# Supplementary material for: Density functional theory investigations on the binding modes of amidoximes with uranyl ions
Source: Royal Society of Chemistry journal article supplement (doi:10.1039/c5dt04645a), 2016-01-01
Supplement: c5dt04645a1.pdf [file c5dt04645a1.pdf]

## Supporting information for

### Density Functional Theory Investigations on the Binding Modes of Amidoximes with Uranyl Ions

Chuting Yang,<sup>a,b</sup> Shuqi Pei,<sup>a,c</sup> Baihua Chen,<sup>b</sup> Lina Ye,<sup>a</sup> Haizhu Yu<sup>a,\*</sup> Sheng Hu<sup>b,\*</sup>

<sup>a</sup> *Department of Chemistry and Center for Atomic Engineering of Advanced Materials, Anhui  
University, Hefei, 230601*

<sup>b</sup> *Institute of Nuclear Physics and Chemistry, CAEP, Mianyang, 621900, China.*

<sup>c</sup> *Department of Polymer Science and Engineering, University of Science and Technology Beijing,  
Beijing 100083, PR China.*

*E-mail: [yuhai Zhu@ahu.edu.cn](mailto:yuhai Zhu@ahu.edu.cn); [husheng@126.com](mailto:husheng@126.com)*

## Table of Contents

|                                                                                                                                     |            |
|-------------------------------------------------------------------------------------------------------------------------------------|------------|
| <b>The Wiberg bond order of U-O(Neu) complexes .....</b>                                                                            | <b>S3</b>  |
| <b>The relative enthalpies of each series of the uranyl complexes. ....</b>                                                         | <b>S4</b>  |
| <b>The relative enthalpies calculated for AAO1, AAO1' and AAO1'' .....</b>                                                          | <b>S16</b> |
| <b>Comparison between the calculation results with B3LYP and B3LYP-D3 .....</b>                                                     | <b>S17</b> |
| <b>Thermal correction to enthalpy (TCE), and total electronic energy (E) in water<br/>solvent for all species (in hartree).....</b> | <b>S18</b> |
| <b>Cartesian coordinates for the examined structures.....</b>                                                                       | <b>S21</b> |

**Table S1.** The Wiberg bond order of U-O(AO1/TAO1/EtOH) of the species in Figure 4.<sup>a</sup>

|                    |            |        |                  |        |            |
|--------------------|------------|--------|------------------|--------|------------|
| <b>U-EtOH</b>      | 0.4022     |        | <b>U-M2-EtOH</b> | 0.4738 | 0.3726     |
|                    | U-O (EtOH) |        |                  | U-N    | U-O (EtOH) |
| <b>U-EtOH-EtOH</b> | 0.3690     |        | <b>U-M1-EtOH</b> | 0.3673 | 0.3754     |
|                    | U-O(EtOH)  |        |                  | U-O    | U-O (EtOH) |
| <b>U-M5</b>        | 0.3129     | 0.3219 | <b>U-M6-EtOH</b> | 0.6563 | 0.3547     |
|                    | U-O        | U-N    |                  | U-O    | U-O (EtOH) |
| <b>U-M2</b>        | 0.4584     |        | <b>U-M2-M2</b>   | 0.4699 |            |
|                    | U-N        |        |                  | U-N    |            |
| <b>U-M4</b>        | 0.4118     | 0.2687 | <b>U-M6-M6</b>   | 0.6394 | 0.5959     |
|                    | U-N        | U-O    |                  | U-N    | U-N        |
| <b>U-M6</b>        | 0.6402     |        |                  |        |            |
|                    | U-O        |        |                  |        |            |

<sup>a</sup>The U-O and U-N distances correspond to the U-oxime bond lengths unless otherwise noted.

# 1. The relative enthalpies of the examined U-AO complexes

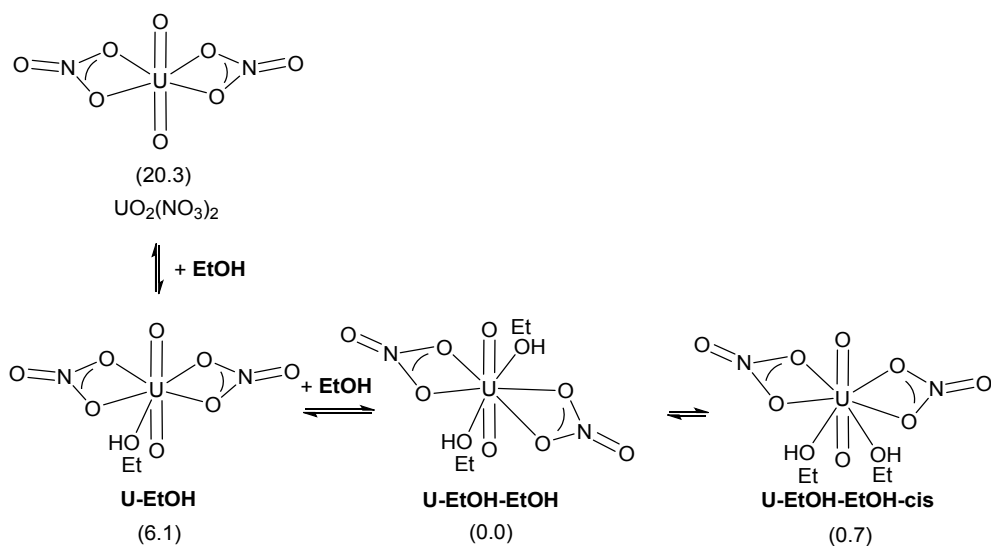

**Figure S1.** The equilibrium between the  $\text{U}(\text{NO}_3)_2(\text{EtOH})_n$  ( $n=0, 1, \text{ or } 2$ ) complexes.

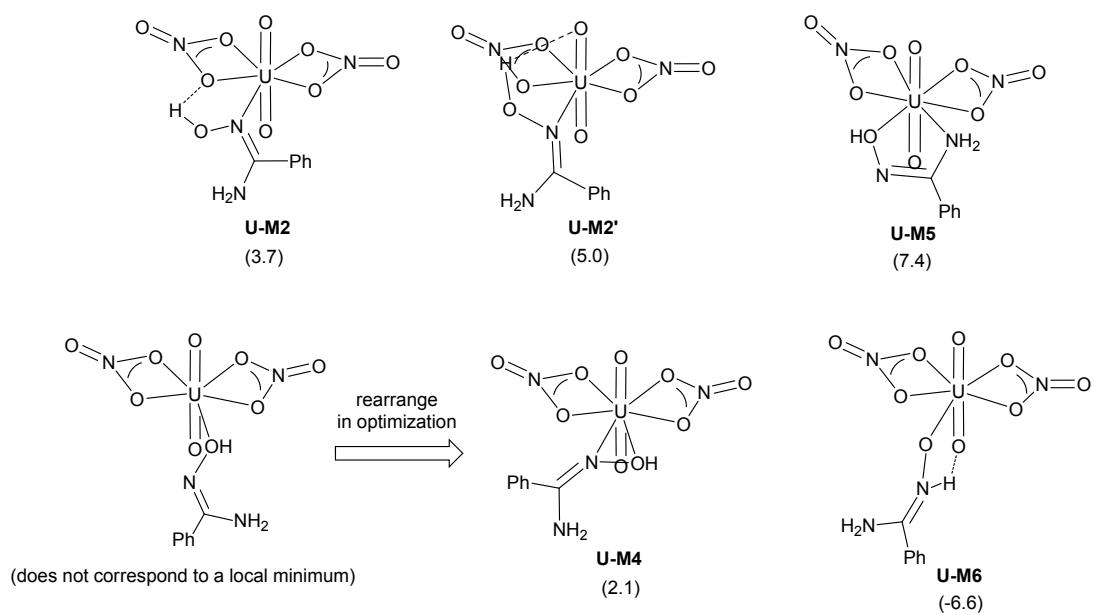

**Figure S2.** The comparison between the different  $\text{UO}_2(\text{NO}_3)_2(\text{AO1})$  and  $\text{UO}_2(\text{NO}_3)_2(\text{TAO1})$  complexes.

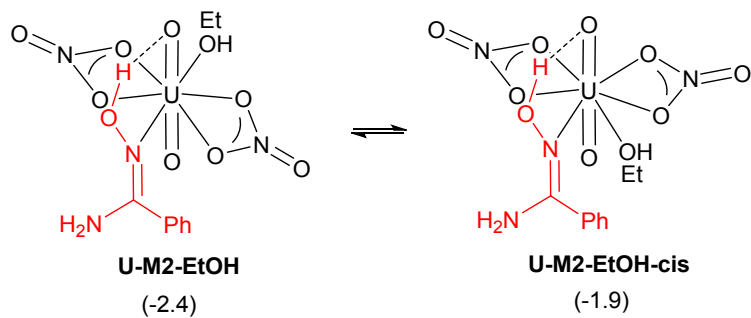

**Figure S3.** The comparison between different  $\text{UO}_2(\text{NO}_3)_2(\text{EtOH})(\text{AO1})$  via the  $\eta^1\text{-N}$  coordination mode.

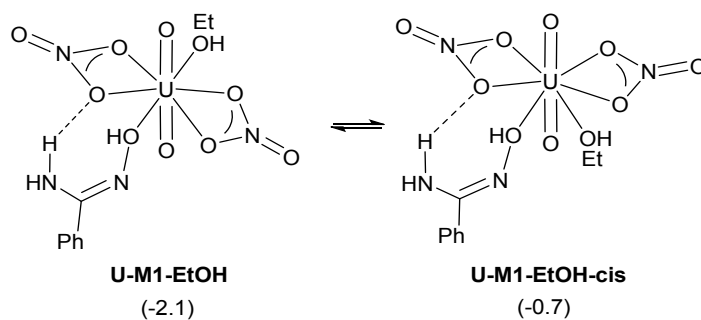

**Figure S4.** The comparison between different  $\text{UO}_2(\text{NO}_3)_2(\text{EtOH})(\text{AO1})$  via the  $\eta^1\text{-O(H)}$  coordination mode.

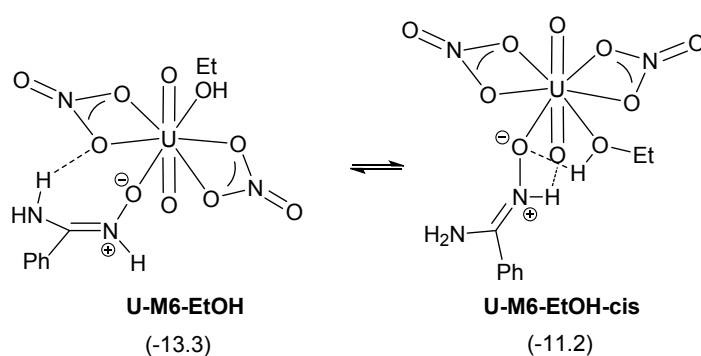

**Figure S5.** The comparison between  $\text{UO}_2(\text{NO}_3)_2(\text{EtOH})(\text{TAO1})$  via the  $\eta^1\text{-O}$  coordinated TAO1.

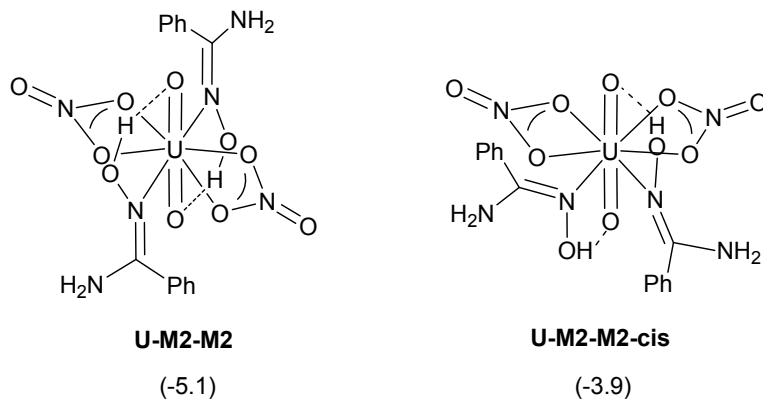

**Figure S6.** The comparison between different  $\text{UO}_2(\text{NO}_3)_2(\text{AO1})_2$  with double  $\eta^1\text{-N}$  coordination modes.

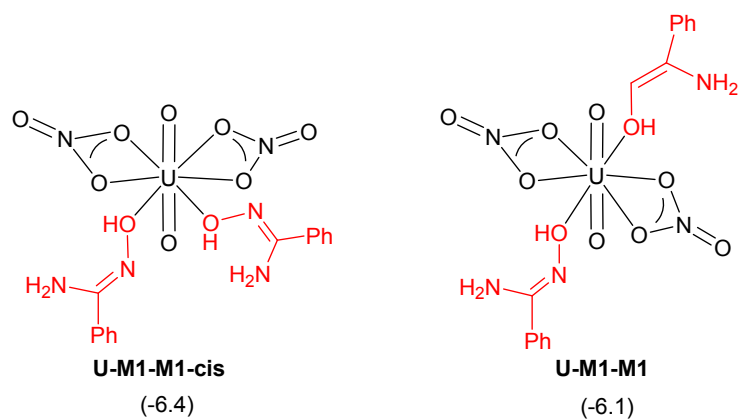

**Figure S7.** The comparison between different  $\text{UO}_2(\text{NO}_3)_2(\text{AO1})_2$  with double  $\eta^1\text{-O(H)}$  coordination modes.

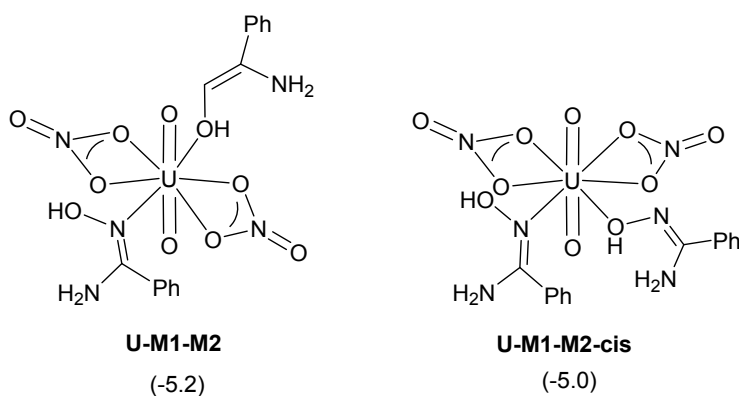

**Figure S8.** The comparison between different  $\text{UO}_2(\text{NO}_3)_2(\text{AO1})_2$  with one  $\eta^1\text{-O(H)}$  and another  $\eta^1\text{-N}$  coordination modes.

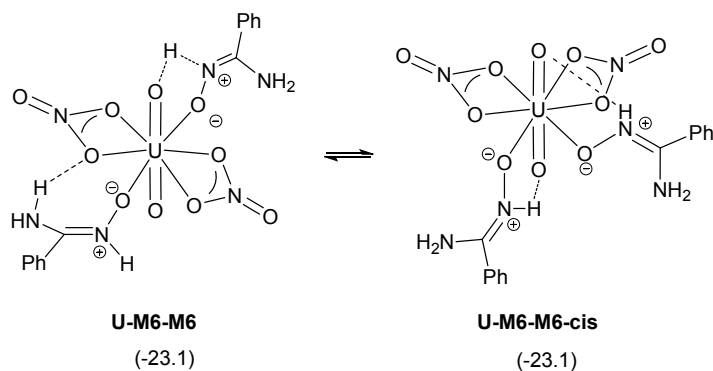

**Figure S9.** The comparison between different  $\text{UO}_2(\text{NO}_3)_2(\text{TAO1})_2$  with double  $\eta^1\text{-O}$  modes.

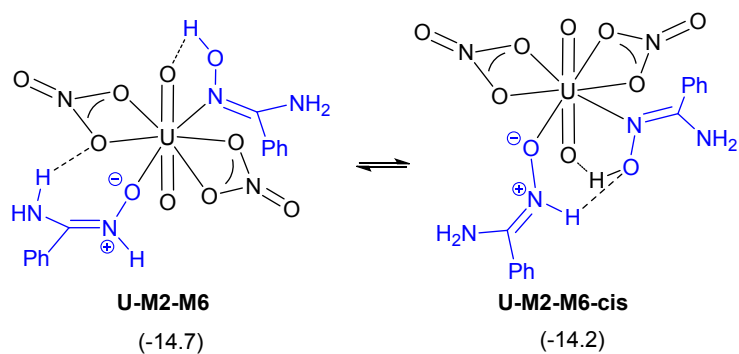

**Figure S10.** The comparison between different  $\text{UO}_2(\text{NO}_3)_2(\text{TAO1})(\text{AO1})$ .

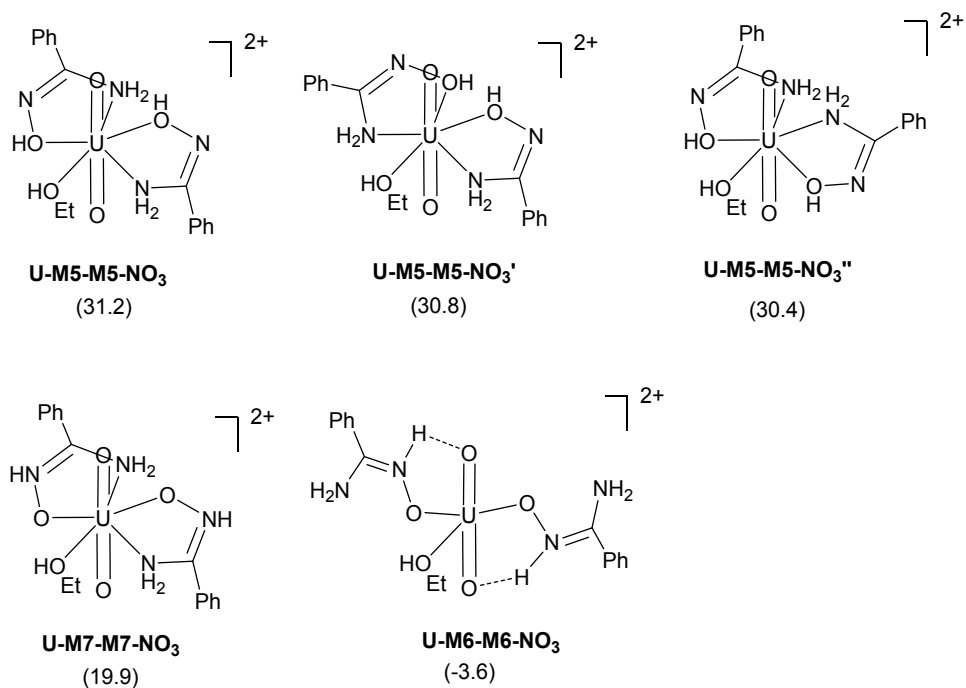

**Figure S11.** The possible complexes formed via the ligand exchange of **AO1/TAO1** with  $\text{NO}_3^-$  on **U-EtOH**.

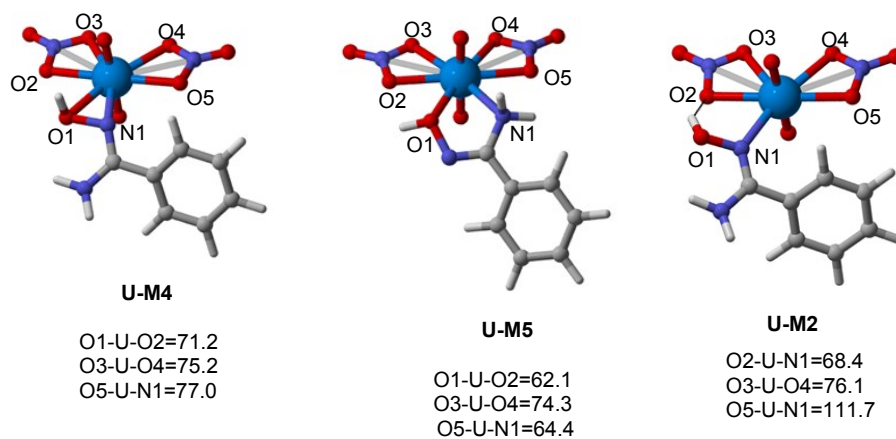

**Figure S12.** The comparison between the structure of **U-M5**, **U-M4**, and **U-M2**. *The large chelating angle of AO1 ligand in U-M5 results in the crowded equatorial plane of the uranium center.*



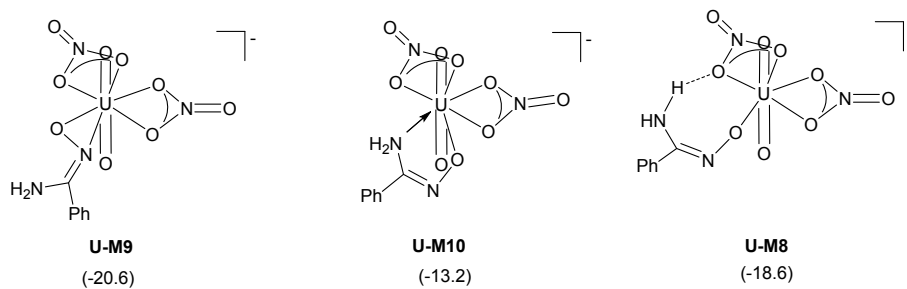

**Figure S13.** The comparison between different  $\text{UO}_2(\text{NO}_3)_2(\text{AAO1})$  complexes.

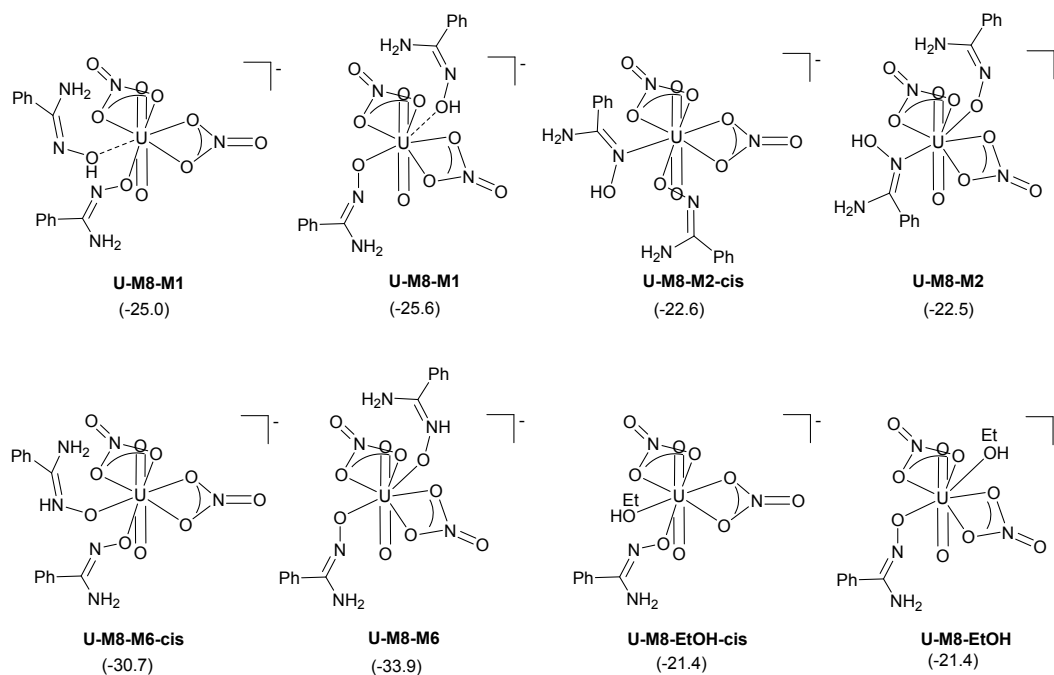

**Figure S14.** The comparison between different  $\text{UO}_2(\text{NO}_3)_2(\text{AAO1})(\text{Neu})$  complexes.

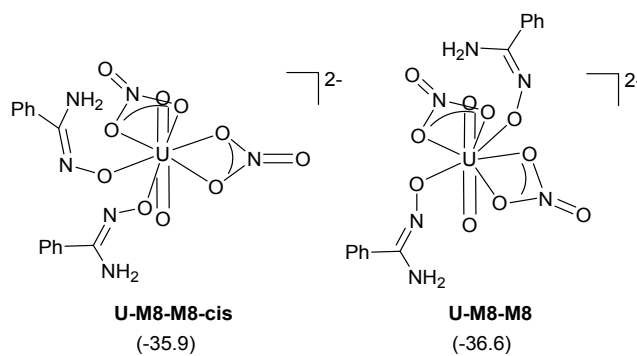

**Figure S15.** The comparison between different  $\text{UO}_2(\text{NO}_3)_2(\text{AAO1})_2$  complexes with double **M8** modes.

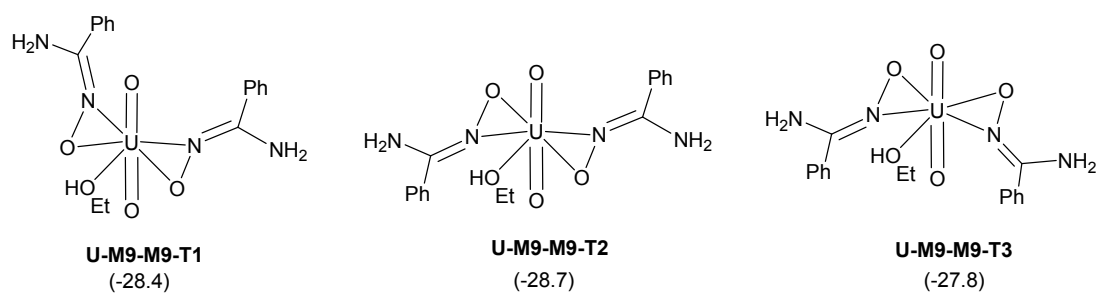

**Figure S16.** The comparisons between different  $\text{UO}_2(\text{EtOH})(\text{AAO1})_2$  complexes with double **M9** modes.

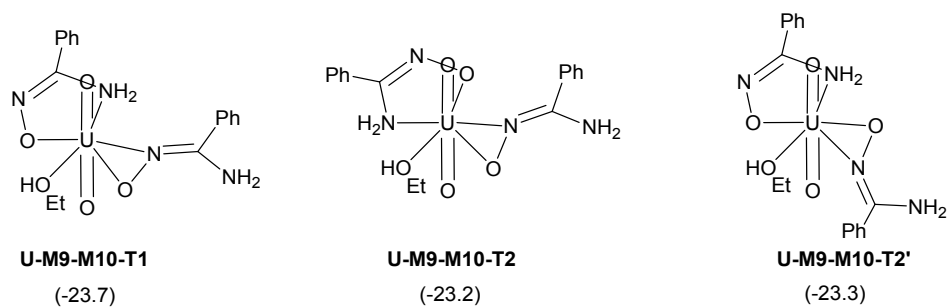

**Figure S17.** The comparison between different  $\text{UO}_2(\text{EtOH})(\text{AAO1})_2$  complexes with one **M9** and one **M10** modes.

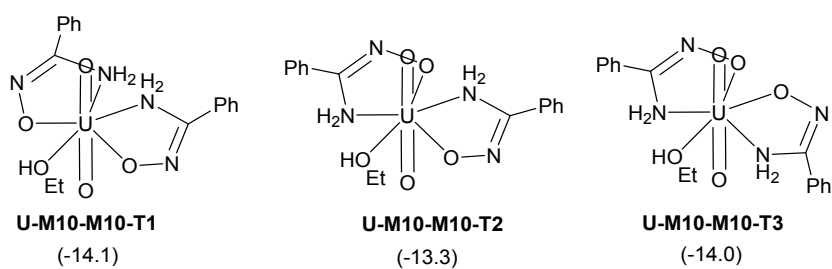

**Figure S18.** The comparison between different  $\text{UO}_2(\text{EtOH})(\text{AAO1})_2$  complexes with double **M10** modes.

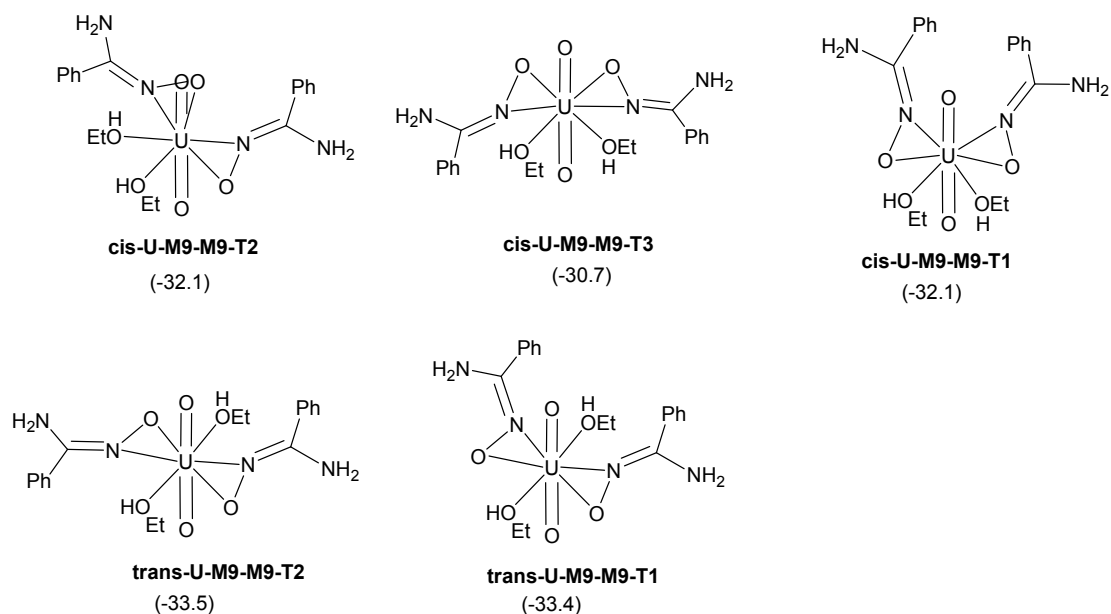

**Figure S19.** The comparison between different  $\text{UO}_2(\text{EtOH})_2(\text{AAO1})_2$  complexes (AAO1 is ligated via **M9** mode).

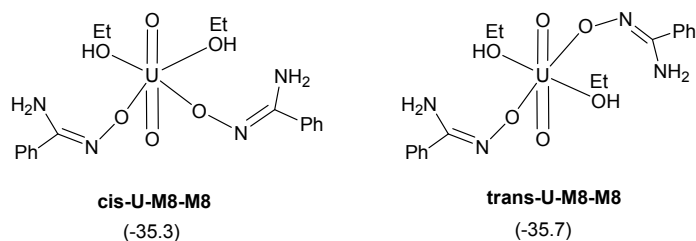

**Figure S20.** The comparison between different  $\text{UO}_2(\text{EtOH})_2(\text{AL1})_2$  complexes with double mono-O coordinated AL1 ligands.

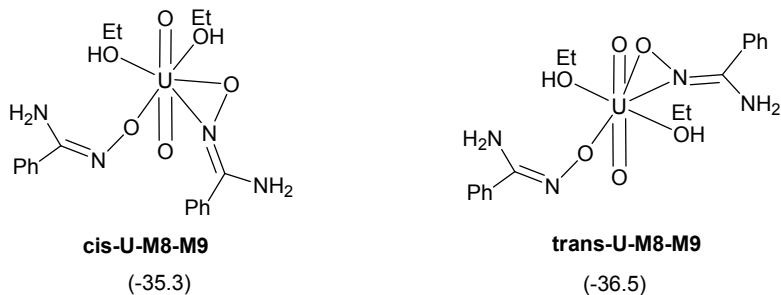

**Figure S21.** The comparison between different  $\text{UO}_2(\text{EtOH})_2(\text{AAO1})_2$  complexes with one **M8** and one **M9** AAOs.

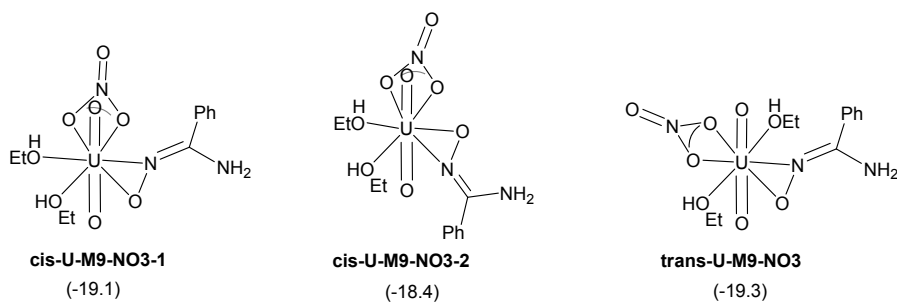

**Figure S22.** The comparison between different  $\text{UO}_2(\text{EtOH})_2(\text{NO}_3)(\text{AAO1})$  complexes (via **M9**).

**Table S2.** The possible coordination modes of AAO1' and AAO1'', and the symbol for each of them in the nomenclature of the formed uranyl complexes.

| Binding modes of AAO1'  |     |     |     |
|-------------------------|-----|-----|-----|
| Symbol                  | M11 | M12 | M13 |
| Binding modes of AAO1'' |     |     |     |
| Symbol                  | M14 | M15 | M16 |

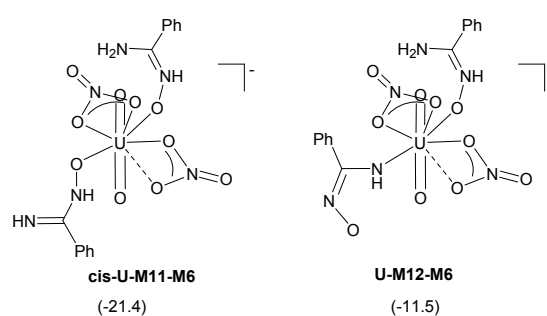

**Figure S23.** The comparison between different  $\text{UO}_2(\text{NO}_3)_2(\text{AAO1}')(\text{TAO1})$  complexes.

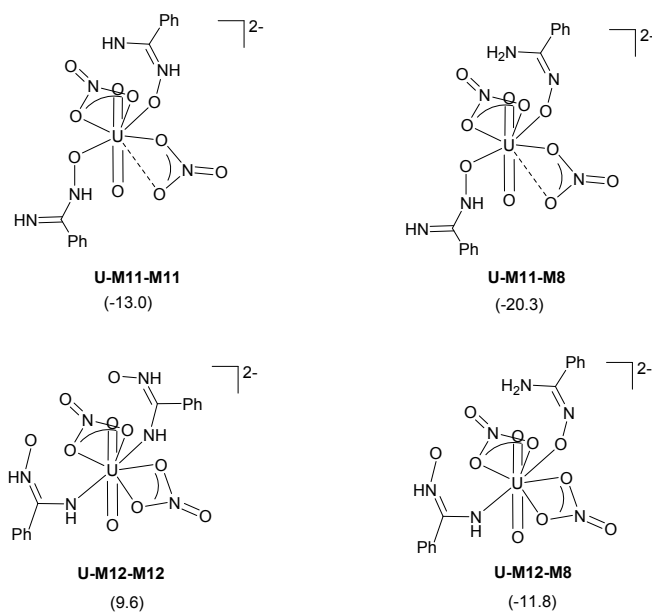

**Figure S24.** The comparison between different  $\text{UO}_2(\text{NO}_3)_2(\text{AAO1}')_2$  and  $\text{UO}_2(\text{NO}_3)_2(\text{AAO1}')(\text{AAO1})$  complexes.

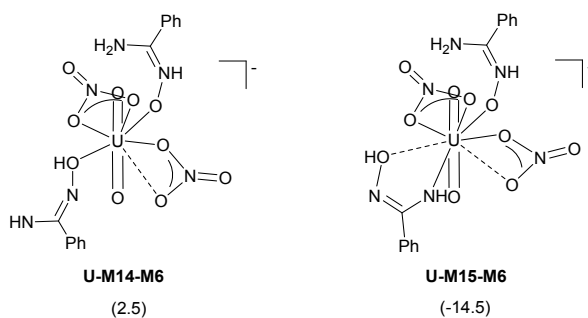

**Figure S25.** The comparison between different  $\text{UO}_2(\text{NO}_3)_2(\text{AAO1}')(\text{TAO1})$  complexes.

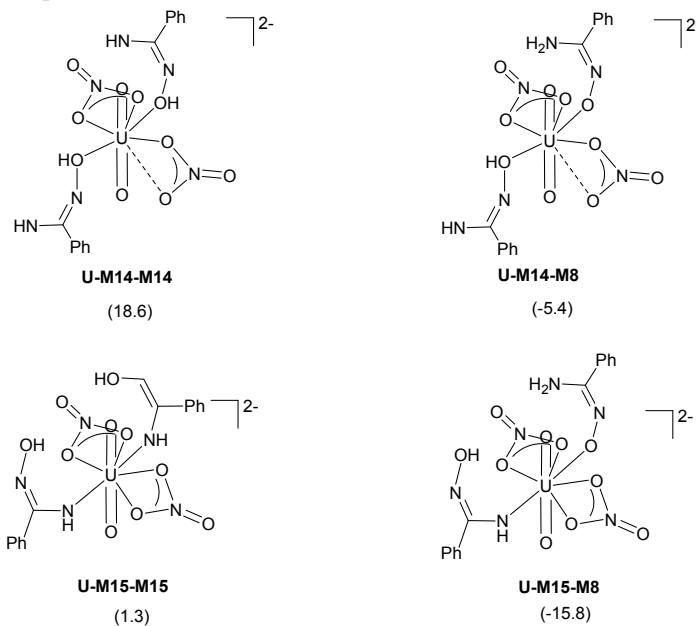

**Figure S26.** The comparison between different  $\text{UO}_2(\text{NO}_3)_2(\text{AAO1}')_2$  and  $\text{UO}_2(\text{NO}_3)_2(\text{AAO1}')(\text{AAO1})$  complexes.

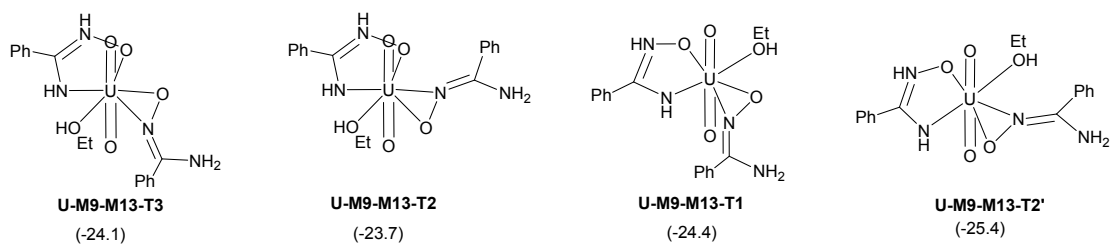

**Figure S27.** The comparison between different  $\text{UO}_2(\text{EtOH})(\text{AAO1}')(\text{AAO1})$  complexes (AAO1' is coordinated with M13 mode, and AAO1 is coordinated with M9 mode).

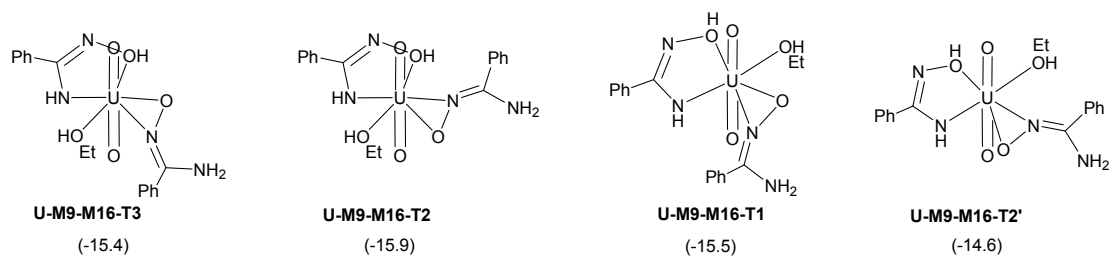

**Figure S28.** The comparison between different  $\text{UO}_2(\text{EtOH})(\text{AAO1}'')(\text{AAO1})$  complexes ( $\text{AAO1}''$  M16, and  $\text{AAO1}$  is coordinated with M9 mode).

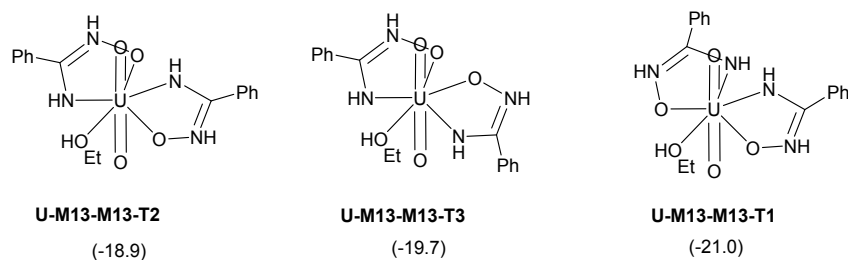

**Figure S29.** The comparison between different  $\text{UO}_2(\text{EtOH})(\text{AAO1}')_2$  complexes (both  $\text{AAO1}'$  are coordinated with chelated modes).

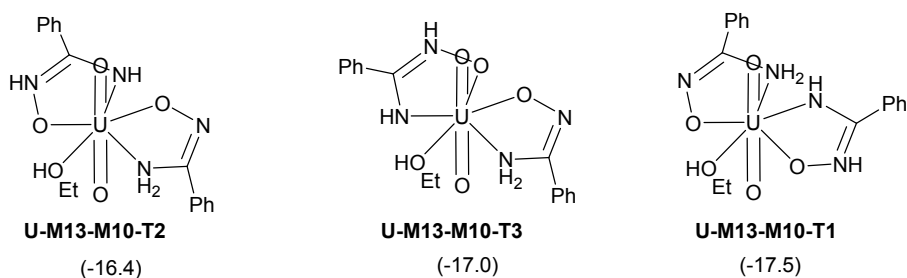

**Figure S30.** The comparison between different  $\text{UO}_2(\text{EtOH})(\text{AAO1}')(\text{AAO1})$  complexes (both  $\text{AAO1}'$  and  $\text{AAO1}$  are coordinated with the chelated modes)

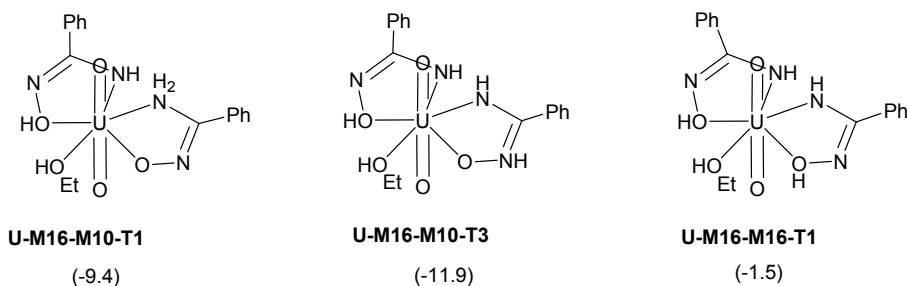

**Figure S31.** The comparison between different  $\text{UO}_2(\text{EtOH})(\text{AAO1}'')(\text{AAO1})$  (both  $\text{AAO1}''$  and  $\text{AAO1}$  are coordinated with the chelated modes)

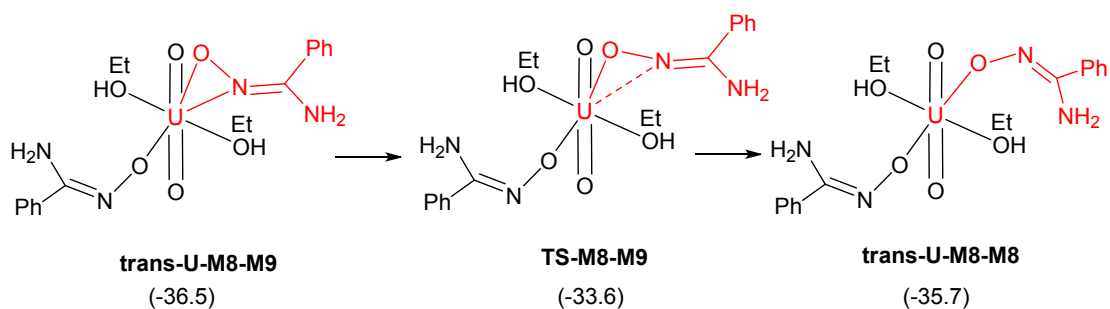

**Figure S32.** The kinetic transformation of **trans-U-M8-M9** to **trans-U-M8-M8** via the transition state of **TS-M8-M9**.

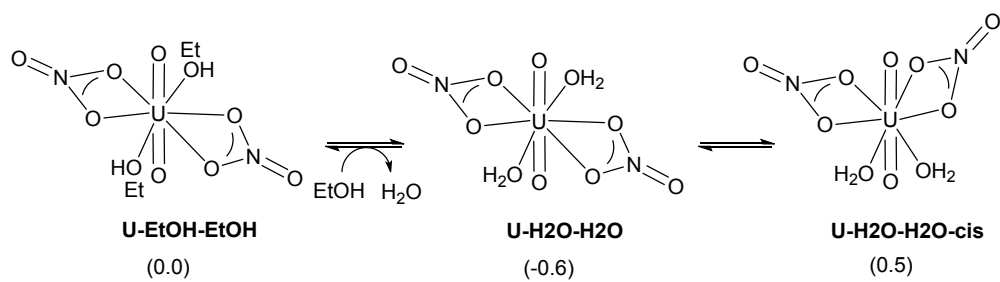

**Figure S33.** The ligand exchange reactions between  $\text{H}_2\text{O}$  and  $\text{EtOH}$  on  $\text{UO}_2(\text{NO}_3)_2(\text{EtOH})_2$ .

## 2. The relative enthalpies calculated for AAO1, AAO1', and AAO1''.

Due to the lack of the absolute energy of H<sup>+</sup>, the relative enthalpy of AAO1, AAO1' and AAO1'' are calculated via the following strategies.

First, similar to our recent studies on predicting the pKa of different organic molecules, the isodesmic reaction (1) has been first designed:

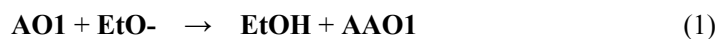

So that

$$\ln K_a = -\frac{\Delta G_{exchange}}{RT} \quad (2)$$

On the basis of eqs 1 and 2, we got

$$e^{-\Delta G_{exchange}/RT} = \frac{[\mathbf{EtO}^-][\mathbf{AO1}]}{[\mathbf{EtOH}][\mathbf{AAO1}]} \quad (3)$$

Using the experimental pKa data of EtOH in H<sub>2</sub>O (i.e. 15.9), we have:

$$pKa(\mathbf{AO1}) = 15.9 + \frac{\Delta G_{exchange}}{2.303RT} \quad (4)$$

With eq.4 and the generated  $\Delta G_{exchange}$ , we got the pKa value of AO1. The Gibbs free energy change ( $\Delta G^0$ ) of the reaction  $\mathbf{AO1} \rightarrow \mathbf{AAO1} + \mathbf{H}^+$  could then be generated from the pKa value and the equation (5).

$$pKa(\mathbf{AO1}) = -\frac{\Delta G^0}{2.303RT} \quad (5)$$

The entropic effect might be negligible in the concerned reaction system. For example, for equation 1,  $\Delta G_{exchange} = -14.2$  kcal/mol, and  $\Delta H_{exchange} = -14.6$  kcal/mol. Therefore,  $\Delta G^0(\mathbf{AAO1})$  data is used as  $\Delta H^0(\mathbf{AAO1})$  in our system.



### 3. Comparison between the calculation results with B3LYP and B3LYP-D3.

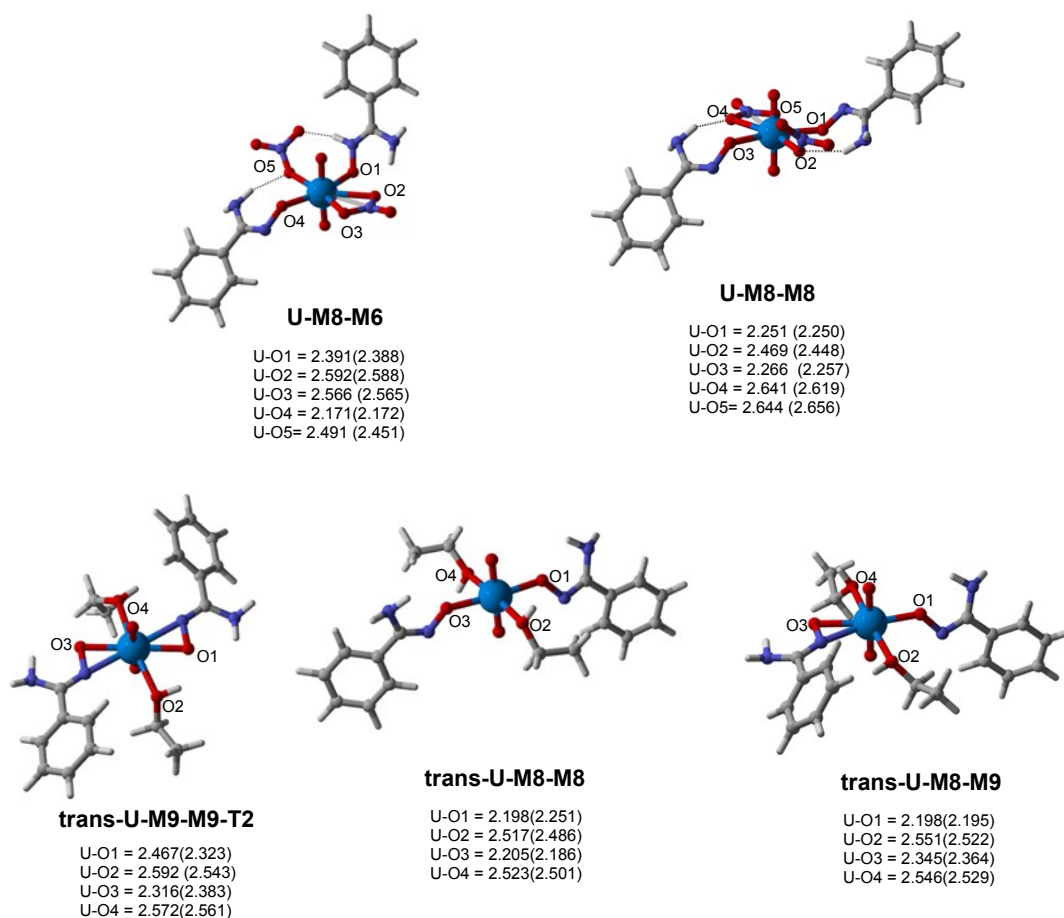

**Figure S34.** The optimized structure and the selected structural parameters of the most stable structures with B3LYP and B3LYP-D3 (in parenthesis) methods. The bond distances are given in angstrom.

**Table 2.** The relative enthalpies of the most stable structures (in kcal/mol).

|                             | <b>U-M8-M6</b>          | <b>U-M8-M8</b>       |                      |  |
|-----------------------------|-------------------------|----------------------|----------------------|--|
| $\Delta H(\text{B3LYP})$    | -33.9                   | -36.6                |                      |  |
| $\Delta H(\text{B3LYP-D3})$ | -30.3                   | -33.1                |                      |  |
|                             | <b>Trans-U-M9-M9-T2</b> | <b>Trans-U-M8-M8</b> | <b>Trans-U-M8-M9</b> |  |
| $\Delta H(\text{B3LYP})$    | -33.5                   | -35.7                | -36.5                |  |
| $\Delta H(\text{B3LYP-D3})$ | -36.3                   | -29.0                | -30.2                |  |

**4. Thermal correction to enthalpy (TCE), and total electronic energy (E) in water solvent for all species (in hartree).**

| <b>Complex</b>                                    | <b>TCG</b> | <b>TCE</b> | <b>E</b>     | <b><math>\Delta H</math></b> | <b><math>\Delta G</math></b> | <b>Complex</b>         | <b>TCG</b> | <b>TCE</b> | <b>E</b>     | <b><math>\Delta H</math></b> | <b><math>\Delta G</math></b> |
|---------------------------------------------------|------------|------------|--------------|------------------------------|------------------------------|------------------------|------------|------------|--------------|------------------------------|------------------------------|
| <b>UO<sub>2</sub>(NO<sub>3</sub>)<sub>2</sub></b> | -0.002659  | 0.050222   | -1188.549988 | 20.3                         | -1.6                         | <b>U-EtOH</b>          | 0.070714   | 0.137805   | -1343.670209 | 6.1                          | -5.5                         |
| <b>U-EtOH-EtOH</b>                                | 0.146667   | 0.225937   | -1498.778067 | 0.0                          | 0.0                          | <b>U-EtOH-EtOH-cis</b> | 0.146816   | 0.225813   | -1498.776862 | 0.7                          | 0.8                          |
| <b>U-M2</b>                                       | 0.128774   | 0.206083   | -1644.949069 | 3.7                          | -5.7                         | <b>U-M2'</b>           | 0.127546   | 0.206041   | -1644.946973 | 5.0                          | -5.2                         |
| <b>U-M5</b>                                       | 0.130037   | 0.206175   | -1644.943271 | 7.4                          | -1.3                         | <b>U-M4</b>            | 0.127719   | 0.205711   | -1644.951254 | 2.1                          | -7.8                         |
| <b>U-M6</b>                                       | 0.126853   | 0.206239   | -1644.965779 | -6.6                         | -17.4                        | <b>U-M2-EtOH</b>       | 0.202538   | 0.293861   | -1800.056651 | -2.4                         | -1.5                         |
| <b>U-M2-EtOH-cis</b>                              | 0.204542   | 0.294073   | -1800.056104 | -1.9                         | 0.1                          | <b>U-M1-EtOH</b>       | 0.201165   | 0.29359    | -1800.056772 | -2.1                         | -2.3                         |
| <b>U-M1-EtOH-cis</b>                              | 0.202433   | 0.29343    | -1800.054399 | -0.7                         | 0.0                          | <b>U-M6-EtOH</b>       | 0.203914   | 0.294253   | -1800.074431 | -13.3                        | -11.8                        |
| <b>U-M6-EtOH-cis</b>                              | 0.203856   | 0.294226   | -1800.070995 | -11.2                        | -9.7                         | <b>U-M2-M2</b>         | 0.259232   | 0.361821   | -2101.335757 | -5.1                         | -2.8                         |
| <b>U-M2-M2-cis</b>                                | 0.261669   | 0.362112   | -2101.334092 | -3.9                         | -0.2                         | <b>U-M1-M1-cis</b>     | 0.259184   | 0.361094   | -2101.337008 | -6.4                         | -3.6                         |
| <b>U-M1-M1</b>                                    | 0.257090   | 0.361105   | -2101.336575 | -6.1                         | -4.6                         | <b>U-M1-M2</b>         | 0.261000   | 0.360769   | -2101.334868 | -5.2                         | -1.1                         |
| <b>U-M1-M2-cis</b>                                | 0.259939   | 0.361584   | -2101.335353 | -5.0                         | -2.1                         | <b>U-M6-M6</b>         | 0.258897   | 0.362126   | -2101.364763 | -23.1                        | -21.2                        |
| <b>U-M6-M6-cis</b>                                | 0.259368   | 0.362088   | -2101.364763 | -23.1                        | -20.9                        | <b>U-M2-M6</b>         | 0.260827   | 0.362287   | -2101.351556 | -14.7                        | -11.7                        |
| <b>U-M2-M6-cis</b>                                | 0.261408   | 0.362319   | -2101.350743 | -14.2                        | -10.8                        | <b>U-M5-M5-NO3</b>     | 0.312689   | 0.407588   | -1695.311489 | 31.2                         | 20.4                         |
| <b>U-M5-M5-NO3'</b>                               | 0.313572   | 0.407637   | -1695.312222 | 30.8                         | 20.5                         | <b>U-M5-M5-NO3''</b>   | 0.313105   | 0.407679   | -1695.312885 | 30.4                         | 19.8                         |
| <b>U-M7-M7-NO3</b>                                | 0.315513   | 0.409429   | -1695.331325 | 19.9                         | 9.7                          | <b>U-M6-M6-NO3</b>     | 0.310546   | 0.409077   | -1695.368577 | -3.6                         | -16.7                        |
| <b>U-M4</b>                                       | 0.127719   | 0.205711   | -1644.951254 | 2.1                          | -7.8                         | <b>U-M9</b>            | 0.116874   | 0.192831   | -1644.505297 | -20.6                        | -29.9                        |
| <b>U-M10</b>                                      | 0.116395   | 0.192503   | -1644.49308  | -13.2                        | -22.5                        | <b>U-M8</b>            | 0.114261   | 0.192528   | -1644.501773 | -18.6                        | -29.3                        |
| <b>U-M8-M1-cis</b>                                | 0.244418   | 0.348191   | -2100.884475 | -25.0                        | -24.0                        | <b>U-M8-M1</b>         | 0.241011   | 0.348137   | -2100.885326 | -25.6                        | -26.7                        |
| <b>U-M8-M2-cis</b>                                | 0.245062   | 0.348004   | -2100.880507 | -22.6                        | -21.1                        | <b>U-M8-M2</b>         | 0.245283   | 0.348195   | -2100.880549 | -22.5                        | -21.0                        |
| <b>U-M8-M6-cis</b>                                | 0.247081   | 0.34786    | -2100.893152 | -30.7                        | -27.8                        | <b>U-M8-M6</b>         | 0.246137   | 0.348363   | -2100.898893 | -33.9                        | -32.0                        |
| <b>U-M8-M8-cis</b>                                | 0.228616   | 0.333678   | -2100.418031 | -35.9                        | -36.3                        | <b>U-M8-M8</b>         | 0.224928   | 0.333792   | -2100.419249 | -36.6                        | -39.4                        |

|                         |          |          |              |       |        |                         |          |          |              |       |        |
|-------------------------|----------|----------|--------------|-------|--------|-------------------------|----------|----------|--------------|-------|--------|
| <b>U-M9-M9-T2</b>       | 0.287933 | 0.382109 | -1694.44269  | -28.7 | -40.1  | <b>U-M9-M9-T3</b>       | 0.288968 | 0.38219  | -1694.441442 | -27.8 | -38.7  |
| <b>U-M9-M9-T1</b>       | 0.289190 | 0.382251 | -1694.442448 | -28.4 | -39.2  | <b>U-M9-M10-T1</b>      | 0.288716 | 0.382014 | -1694.434607 | -23.7 | -34.6  |
| <b>U-M9-M10-T2</b>      | 0.288993 | 0.381959 | -1694.433887 | -23.2 | -34.0  | <b>U-M9-M10-T3</b>      | 0.287270 | 0.381997 | -1694.43404  | -23.3 | -35.1  |
| <b>U-M10-M10-T1</b>     | 0.288374 | 0.381798 | -1694.419174 | -14.1 | -26.8  | <b>U-M10-M10-T3</b>     | 0.285014 | 0.38133  | -1694.418486 | -14.0 | -26.8  |
| <b>U-M10-M10-T2</b>     | 0.287612 | 0.381942 | -1694.417959 | -13.3 | -24.8  | <b>Cis-U-M9-M9-T2</b>   | 0.364534 | 0.469912 | -1849.54601  | -32.1 | -31.4  |
| <b>Cis-U-M9-M9-T3</b>   | 0.365938 | 0.469707 | -1849.543578 | -30.7 | -29.0  | <b>Cis-U-M9-M9-T1</b>   | 0.365041 | 0.46989  | -1849.545898 | -32.1 | -31.0  |
| <b>Trans-U-M9-M9-T2</b> | 0.365050 | 0.469943 | -1849.548245 | -33.5 | -32.5  | <b>Trans-U-M9-M9-T1</b> | 0.365654 | 0.469764 | -1849.547812 | -33.4 | -31.8  |
| <b>Cis-U-M8-M8</b>      | 0.361252 | 0.469059 | -1849.550253 | -35.3 | -36.1  | <b>Trans-U-M8-M8</b>    | 0.359098 | 0.469207 | -1849.550993 | -35.7 | -38.0  |
| <b>Cis-U-M8-M9</b>      | 0.361535 | 0.469479 | -1849.550544 | -35.3 | -36.1  | <b>Trans-U-M8-M9</b>    | 0.360995 | 0.469433 | -1849.552422 | -36.5 | -37.7  |
| <b>Cis-U-M9-NO3-1</b>   | 0.254961 | 0.347874 | -1674.166786 | -19.1 | -19.1  | <b>Cis-U-M9-NO3-2</b>   | 0.255370 | 0.347606 | -1674.165439 | -18.4 | -18.0  |
| <b>Trans-U-M9-NO3</b>   | 0.255802 | 0.347885 | -1674.16714  | -19.3 | -18.8  | <b>U-M11-M6</b>         | 0.246393 | 0.348432 | -2100.878912 | -21.4 | -19.3  |
| <b>U-M12-M6</b>         | 0.248110 | 0.348553 | -2100.863338 | -11.5 | -8.4   | <b>U-M11-M11</b>        | 0.230320 | 0.334247 | -2100.382071 | -13.0 | -12.7  |
| <b>U-M11-M8</b>         | 0.230112 | 0.33394  | -2100.393424 | -20.3 | -19.9  | <b>U-M12-M12</b>        | 0.230599 | 0.33363  | -2100.345402 | 9.6   | 10.5   |
| <b>U-M12-M8</b>         | 0.230875 | 0.333775 | -2100.3797   | -11.8 | -10.8  | <b>U-M14-M6</b>         | 0.243413 | 0.346612 | -2100.839105 | 2.5   | 3.9    |
| <b>U-M15-M6</b>         | 0.248854 | 0.348568 | -2100.868167 | -14.5 | -11.0  | <b>U-M14-M14</b>        | 0.227178 | 0.332427 | -2100.32981  | 18.6  | 18.1   |
| <b>U-M14-M8</b>         | 0.228882 | 0.332975 | -2100.3686   | -5.4  | -5.1   | <b>U-M15-M15</b>        | 0.230268 | 0.333104 | -2100.358129 | 1.3   | 2.3    |
| <b>U-M15-M8</b>         | 0.231386 | 0.333513 | -2100.385704 | -15.8 | -14.3  | <b>U-M9-M13-T3</b>      | 0.288822 | 0.382142 | -1694.43539  | -24.1 | -35.0  |
| <b>U-M9-M13-T2</b>      | 0.288685 | 0.382314 | -1694.435019 | -23.7 | -34.9  | <b>U-M9-M13-T1</b>      | 0.290490 | 0.382521 | -1694.436234 | -24.4 | -34.5  |
| <b>U-M9-M13-T2'</b>     | 0.288484 | 0.382178 | -1694.437592 | -25.4 | -36.6  | <b>U-M9-M16-T3</b>      | 0.287900 | 0.381439 | -1694.420891 | -15.4 | -26.5  |
| <b>U-M9-M16-T2</b>      | 0.285966 | 0.381411 | -1694.421677 | -15.9 | -28.2  | <b>U-M9-M16-T1</b>      | 0.286904 | 0.381442 | -1694.420955 | -15.5 | -27.1  |
| <b>U-M9-M16-T2'</b>     | 0.286556 | 0.381328 | -1694.419499 | -14.6 | -26.5  | <b>U-M13-M13-T2</b>     | 0.290137 | 0.382419 | -1694.427358 | -18.9 | -29.1  |
| <b>U-M13-M13-T3</b>     | 0.289395 | 0.382089 | -1694.428286 | -19.7 | -30.2  | <b>U-M13-M13-T1</b>     | 0.289272 | 0.38218  | -1694.430559 | -21.0 | -31.7  |
| <b>U-M13-M10-T2</b>     | 0.288898 | 0.382161 | -1694.423209 | -16.4 | -208.6 | <b>U-M13-M10-T3</b>     | 0.287706 | 0.381804 | -1694.423807 | -17.0 | -209.0 |

|                      |          |          |              |       |       |                     |          |          |              |       |       |
|----------------------|----------|----------|--------------|-------|-------|---------------------|----------|----------|--------------|-------|-------|
| <b>U-M13-M10-T1</b>  | 0.290199 | 0.382187 | -1694.424869 | -17.5 | -27.5 | <b>U-M16-M10-T1</b> | 0.288126 | 0.381238 | -1694.411089 | -9.4  | -20.2 |
| <b>U-M16-M10-T3</b>  | 0.288086 | 0.381538 | -1694.415353 | -11.9 | -20.2 | <b>U-M16-M16-T1</b> | 0.286950 | 0.380466 | -1694.3978   | -1.5  | -20.2 |
| <b>U-EtOH-EtOH</b>   | 0.146667 | 0.225937 | -1498.778067 | 0.0   | 0.0   | <b>U-H2O-H2O</b>    | 0.041995 | 0.106023 | -1341.509397 | -0.6  | 2.1   |
| <b>U-H2O-H2O-cis</b> | 0.042791 | 0.106429 | -1341.508057 | 0.5   | 3.4   | <b>TS-M8-M9</b>     | 0.362425 | 0.468266 | -1849.546711 | -33.6 | -33.2 |

## 5. Cartesian coordinates for the examined structures.

### UO<sub>2</sub>(NO<sub>3</sub>)<sub>2</sub>

|   |             |             |             |
|---|-------------|-------------|-------------|
| U | 0.0000200   | 0.00002300  | -0.00003900 |
| O | -0.00027000 | 1.75223000  | 0.00003500  |
| O | 0.00024800  | -1.75217700 | -0.00031800 |
| O | 2.16642400  | -0.00005400 | 1.08094100  |
| O | 2.16689900  | 0.00024300  | -1.08094900 |
| O | 4.06674600  | -0.00013900 | 0.00034000  |
| N | 2.87688700  | 0.00001100  | 0.00004600  |
| O | -2.16648200 | -0.00023600 | 1.08095300  |
| N | -2.87688600 | -0.00009600 | 0.00007000  |
| O | -2.16684500 | 0.00004000  | -1.08093600 |
| O | -4.06674600 | -0.00009100 | 0.00028300  |

### U-ETOH

|   |             |             |             |
|---|-------------|-------------|-------------|
| U | 0.0000200   | 0.00002300  | -0.00003900 |
| O | -0.00027000 | 1.75223000  | 0.00003500  |
| O | 0.00024800  | -1.75217700 | -0.00031800 |
| O | 2.16642400  | -0.00005400 | 1.08094100  |
| O | 2.16689900  | 0.00024300  | -1.08094900 |
| O | 4.06674600  | -0.00013900 | 0.00034000  |
| N | 2.87688700  | 0.00001100  | 0.00004600  |
| O | -2.16648200 | -0.00023600 | 1.08095300  |
| N | -2.87688600 | -0.00009600 | 0.00007000  |
| O | -2.16684500 | 0.00004000  | -1.08093600 |
| O | -4.06674600 | -0.00009100 | 0.00028300  |

### U-EtOH-EtOH

|   |             |             |             |
|---|-------------|-------------|-------------|
| U | 0.00001200  | 0.06622600  | 0.00012000  |
| O | -0.16728300 | 0.07347500  | 1.75369800  |
| O | -1.06878400 | -2.17261800 | -0.11222000 |
| O | 2.52664500  | 0.19434200  | 0.17942400  |
| O | 1.06974300  | -2.17213500 | 0.11211800  |
| N | 0.00063400  | -2.87654300 | -0.00008200 |
| O | 0.00092100  | -4.07439200 | -0.00022400 |
| O | 0.16728900  | 0.07416900  | -1.75345800 |
| O | 1.06735800  | 2.34417100  | 0.10202100  |
| O | -2.52671600 | 0.19332100  | -0.17917500 |
| O | -1.06822600 | 2.34373800  | -0.10168500 |

|   |             |             |             |
|---|-------------|-------------|-------------|
| N | -0.00055400 | 3.04928300  | -0.00002000 |
| O | -0.00076100 | 4.24682600  | -0.00028300 |
| H | 2.77516000  | 1.12501200  | 0.25928400  |
| H | -2.77566800 | 1.12391000  | -0.25862300 |
| C | -3.57988600 | -0.54195000 | 0.50066500  |
| C | -4.88551200 | -0.45282000 | -0.26749300 |
| H | -3.67823400 | -0.15041600 | 1.51774300  |
| H | -3.21703100 | -1.56545300 | 0.55444500  |
| H | -5.65525000 | -1.03977500 | 0.24100000  |
| H | -5.24401700 | 0.57915500  | -0.33286100 |
| H | -4.76498200 | -0.84433500 | -1.27951400 |
| C | 3.57976200  | -0.54000100 | -0.50150300 |
| C | 4.88534100  | -0.45231600 | 0.26691500  |
| H | 3.67825500  | -0.14685700 | -1.51794500 |
| H | 3.21675400  | -1.56336200 | -0.55694800 |
| H | 5.65503000  | -1.03857700 | -0.24245400 |
| H | 5.24398700  | 0.57949600  | 0.33399500  |
| H | 4.76463400  | -0.84544700 | 1.27828600  |

### U-EtOH-EtOH-cis

|   |             |             |             |
|---|-------------|-------------|-------------|
| U | 0.03188200  | -0.25537400 | -0.00790300 |
| O | 0.26773900  | -0.21435300 | 1.73968300  |
| O | 2.45536900  | -0.02304700 | -0.39272100 |
| O | 1.71000600  | -2.03879800 | -0.27463200 |
| O | 3.83935400  | -1.69886600 | -0.62883300 |
| N | 2.73176400  | -1.28543000 | -0.44316400 |
| O | -0.26538500 | -0.21101700 | -1.74485900 |
| O | -2.34092400 | -0.87186200 | 0.40427600  |
| O | -0.97526100 | -2.51674000 | 0.16509400  |
| O | -3.08292600 | -2.92229900 | 0.57153700  |
| O | 0.79714600  | 2.19666000  | -0.04269700 |
| N | -2.17958000 | -2.15799200 | 0.39098900  |
| H | 0.16220000  | 2.67941300  | 0.50143000  |
| O | -1.75729000 | 1.66171900  | 0.28765700  |
| H | -2.40680900 | 1.23837800  | 0.86738900  |
| C | -2.46587200 | 2.16417500  | -0.88628700 |
| C | -3.48469200 | 3.22068000  | -0.50327100 |
| H | -2.93032400 | 1.31840400  | -1.39800300 |
| H | -1.68444500 | 2.56840600  | -1.52878900 |
| H | -3.97253000 | 3.60630000  | -1.40245500 |
| H | -4.26358500 | 2.80544500  | 0.14293600  |
| H | -3.01164300 | 4.05700200  | 0.01651400  |
| C | 2.08122600  | 2.87876700  | -0.05087000 |
| C | 2.69151300  | 2.95712900  | 1.33596000  |

|   |            |            |             |
|---|------------|------------|-------------|
| H | 1.92624200 | 3.87084000 | -0.48545700 |
| H | 2.70436000 | 2.29547400 | -0.72375200 |
| H | 3.65730300 | 3.46767600 | 1.28625600  |
| H | 2.05302700 | 3.51821500 | 2.02566500  |
| H | 2.85208700 | 1.95711900 | 1.74135200  |

### U-M2

|   |             |             |             |
|---|-------------|-------------|-------------|
| U | 0.74683500  | 0.17606500  | -0.05518300 |
| O | 0.10968600  | 0.25964100  | 1.58251400  |
| O | -0.17349900 | -2.93988100 | -1.17349200 |
| O | 1.32714400  | 0.06540800  | -1.71229400 |
| O | 1.73394700  | 2.43330100  | 0.16590800  |
| O | -0.28199400 | 2.32755000  | -0.59920000 |
| O | 0.68487700  | 4.27381400  | -0.36772400 |
| N | 0.71928600  | 3.08195600  | -0.27020600 |
| O | 3.04104500  | -0.25605400 | 0.74093000  |
| N | 2.98781400  | -1.53341800 | 0.75648900  |
| H | 0.71077500  | -2.94669600 | -0.77041200 |
| N | -0.78620600 | -1.78115400 | -0.64361600 |
| C | -2.06802300 | -1.96436200 | -0.48235200 |
| N | -2.66098700 | -3.16010800 | -0.66839300 |
| H | -3.65972500 | -3.21408000 | -0.76799100 |
| H | -2.08634700 | -3.92406100 | -0.99059100 |
| C | -2.88749500 | -0.80886600 | -0.05950300 |
| C | -3.80739800 | -0.94001700 | 0.98939900  |
| C | -2.73353200 | 0.42797600  | -0.69622900 |
| C | -4.54811200 | 0.16130700  | 1.40118800  |
| H | -3.91329000 | -1.89078100 | 1.49875800  |
| C | -3.47046800 | 1.53094000  | -0.27084400 |
| H | -2.07176000 | 0.52029500  | -1.55075500 |
| C | -4.37791500 | 1.39729000  | 0.77545700  |
| H | -3.32650600 | 2.48715400  | -0.75751100 |
| O | 1.81999300  | -2.00409400 | 0.43884800  |
| O | 3.91068700  | -2.23745600 | 1.03980300  |
| H | -5.24744300 | 0.06102100  | 2.22288800  |
| H | -4.95134200 | 2.25476700  | 1.10747400  |

### U-M2'

|   |             |             |             |
|---|-------------|-------------|-------------|
| U | -0.93221700 | 0.09990900  | -0.01082000 |
| O | 0.04200600  | 0.25939000  | -1.46573400 |
| O | 0.41734500  | -1.43848400 | 2.62756900  |
| O | -1.84772000 | -0.09319400 | 1.49589500  |
| O | -1.91945900 | 2.31250200  | -0.37471100 |

|   |             |             |             |
|---|-------------|-------------|-------------|
| O | -0.09889100 | 2.28930100  | 0.78512600  |
| O | -1.08179900 | 4.19387500  | 0.35570300  |
| N | -1.03715900 | 3.00266900  | 0.26091600  |
| O | -2.68796700 | -1.04825900 | -1.25699400 |
| N | -2.23535600 | -2.24939700 | -1.12196400 |
| H | -0.49012200 | -1.11328500 | 2.71128400  |
| N | 0.90602100  | -0.78022900 | 1.46748300  |
| C | 2.17671100  | -1.05649800 | 1.30500600  |
| N | 2.81782900  | -1.92561700 | 2.10647900  |
| H | 2.30932800  | -2.34784000 | 2.86807400  |
| H | 3.82153100  | -1.97722900 | 2.08685700  |
| C | 2.94313800  | -0.41370200 | 0.21404600  |
| C | 3.74970600  | -1.19804400 | -0.62149400 |
| C | 2.89469900  | 0.97309400  | 0.03456000  |
| C | 4.48947000  | -0.59866900 | -1.63445500 |
| H | 3.76977900  | -2.27480000 | -0.49743500 |
| C | 3.64254500  | 1.56515100  | -0.97870600 |
| H | 2.28351200  | 1.58529600  | 0.68561400  |
| C | 4.43762300  | 0.78326100  | -1.81289700 |
| H | 3.60173200  | 2.63928700  | -1.11415900 |
| O | -1.14686400 | -2.31860900 | -0.43694300 |
| O | -2.77755700 | -3.20664300 | -1.58963200 |
| H | 5.09800000  | -1.21012000 | -2.29022700 |
| H | 5.01478700  | 1.24846800  | -2.60359200 |

### U-M5

|   |             |             |             |
|---|-------------|-------------|-------------|
| U | 1.06981400  | 0.06103600  | 0.08310600  |
| O | 0.45274900  | -0.16157600 | -1.55241300 |
| O | 1.56053300  | 0.26264300  | 1.76557800  |
| O | 3.33415400  | -0.64670100 | -0.59124900 |
| O | 2.00605100  | -2.21745700 | 0.05023600  |
| O | 4.03736600  | -2.71572000 | -0.58591100 |
| N | 3.18247500  | -1.90330000 | -0.38975900 |
| O | 2.24436500  | 2.12092300  | -0.57031100 |
| N | 1.28910000  | 2.94490300  | -0.34198500 |
| O | 0.21112600  | 2.37864200  | 0.09654200  |
| O | 1.37601800  | 4.12519800  | -0.51422000 |
| N | -1.84961800 | -1.89528400 | 0.49017100  |
| O | -0.47417100 | -1.91111100 | 0.84747000  |
| C | -2.29841700 | -0.69659800 | 0.55510800  |
| N | -1.44144000 | 0.36220900  | 0.98293800  |
| C | -3.68589800 | -0.42042300 | 0.13821300  |
| C | -4.32103200 | -1.26707700 | -0.78270900 |

|   |             |             |             |
|---|-------------|-------------|-------------|
| C | -4.38675900 | 0.67523400  | 0.65972600  |
| C | -5.63181800 | -1.01978300 | -1.16703100 |
| H | -3.77301700 | -2.10425700 | -1.19478900 |
| C | -5.70002900 | 0.91826300  | 0.26945000  |
| H | -3.92355500 | 1.33034100  | 1.38887900  |
| C | -6.32414100 | 0.07286000  | -0.64401200 |
| H | -6.11267800 | -1.67402500 | -1.88458300 |
| H | -6.23441900 | 1.76582900  | 0.68165400  |
| H | -7.34514000 | 0.26634900  | -0.95160900 |
| H | -1.80059400 | 1.28662500  | 0.76693200  |
| H | -1.22808200 | 0.30491900  | 1.97780000  |
| H | -0.16595500 | -2.80434600 | 0.64212000  |

#### U-M4

|   |             |             |             |
|---|-------------|-------------|-------------|
| U | 0.98929400  | 0.08091400  | 0.06359700  |
| O | 1.35242600  | 0.28222200  | 1.78142800  |
| O | -0.79970400 | 1.76968300  | 0.24481200  |
| O | 1.14770500  | 2.49666000  | -0.33637200 |
| O | -0.51411600 | 3.90185300  | -0.13940000 |
| N | -0.07732900 | 2.78790200  | -0.08146300 |
| O | 0.56240800  | -0.22820100 | -1.61995000 |
| O | 2.79892400  | -1.57052200 | -0.08358600 |
| O | 3.34699900  | 0.46830400  | -0.53371600 |
| O | 4.86575300  | -1.10022800 | -0.61693700 |
| N | 3.73722400  | -0.74994700 | -0.42345500 |
| O | 0.05585100  | -2.27557300 | 0.83044000  |
| N | -1.01140200 | -1.28777000 | 0.77152000  |
| C | -2.09374500 | -1.80378200 | 0.23545600  |
| N | -2.18127800 | -3.08684600 | -0.13813400 |
| C | -3.25522500 | -0.90824700 | 0.05026400  |
| H | -3.06666600 | -3.48433600 | -0.39939300 |
| H | -1.36792500 | -3.67789400 | -0.06217800 |
| C | -4.14025900 | -1.11279600 | -1.01774500 |
| C | -3.46476500 | 0.15860000  | 0.93209500  |
| C | -5.22913800 | -0.26651700 | -1.18994300 |
| C | -4.55543000 | 1.00059600  | 0.75257800  |
| H | -2.77217300 | 0.32492100  | 1.74561600  |
| C | -5.43966900 | 0.78815400  | -0.30297300 |
| H | -4.70932700 | 1.82822300  | 1.43402700  |
| H | -6.28686400 | 1.44972600  | -0.44147200 |
| H | 0.31728500  | -2.29591700 | 1.76393700  |
| H | -3.95731200 | -1.90137900 | -1.73879200 |
| H | -5.90313000 | -0.42043000 | -2.02411200 |

#### U-M6

|   |             |             |             |
|---|-------------|-------------|-------------|
| U | -1.39032400 | -0.00056100 | 0.10987900  |
| O | -0.40049500 | 0.01656700  | -1.37113200 |
| O | 0.66849000  | -0.29536700 | 1.12948500  |
| O | -2.26711000 | -0.03328000 | 1.63931500  |
| O | -1.53439800 | -2.45583300 | -0.03973500 |
| O | -3.12422900 | -1.35665500 | -1.00615600 |
| O | -3.12988300 | -3.54060700 | -1.06508600 |
| N | -2.62635600 | -2.50861500 | -0.72374100 |
| O | -0.82484000 | 2.38476500  | 0.44165100  |
| N | -1.84091300 | 2.87028100  | -0.18527800 |
| N | 1.80049200  | -0.22804100 | 0.40736800  |
| C | 2.96861300  | -0.28230300 | 0.99690500  |
| N | 3.00097500  | -0.48881600 | 2.32036900  |
| H | 2.10996900  | -0.53167900 | 2.79861800  |
| H | 3.83613700  | -0.27936800 | 2.83993100  |
| C | 4.20137100  | -0.14715300 | 0.20240800  |
| C | 4.27049400  | 0.78598100  | -0.84112300 |
| C | 5.31113500  | -0.95272400 | 0.49178400  |
| C | 5.43638700  | 0.90193500  | -1.59013900 |
| H | 3.43000400  | 1.43919900  | -1.04534000 |
| C | 6.47322300  | -0.82790600 | -0.26090100 |
| H | 5.25220500  | -1.69340100 | 1.28082500  |
| C | 6.53700800  | 0.09728900  | -1.30179500 |
| H | 7.32550600  | -1.45969700 | -0.04142600 |
| O | -2.63896900 | 1.98019400  | -0.66021300 |
| O | -2.02342300 | 4.04775200  | -0.31462300 |
| H | 5.48789300  | 1.62893200  | -2.39156000 |
| H | 7.44425400  | 0.19189100  | -1.88673000 |
| H | 1.69394900  | -0.18896300 | -0.60506600 |

#### U-M2-EtOH

|   |             |             |             |
|---|-------------|-------------|-------------|
| U | 0.66826700  | 0.04445800  | 0.17104100  |
| O | -0.04396800 | 0.20882300  | -1.42960600 |
| O | -1.27490500 | -0.50468900 | 2.87287000  |
| O | 1.34345400  | -0.11082700 | 1.80874500  |
| O | 1.76963300  | -2.06073500 | -0.53612700 |
| O | -0.19850700 | -2.30200300 | 0.29242700  |
| O | 0.89911600  | -4.06038500 | -0.40030000 |
| N | 0.82337300  | -2.87663300 | -0.22333400 |
| O | 1.65596600  | 2.33925400  | -0.06106600 |
| N | 0.65906000  | 3.01977900  | 0.38804200  |
| H | -0.32122600 | -0.38333400 | 2.97579400  |

|   |             |             |             |
|---|-------------|-------------|-------------|
| N | -1.50529800 | -0.19090600 | 1.50835400  |
| C | -2.75338300 | -0.41148000 | 1.20832300  |
| N | -3.61682300 | -0.95957400 | 2.09190900  |
| H | -4.60481100 | -0.90189100 | 1.91770000  |
| H | -3.28791700 | -1.14929600 | 3.02546900  |
| O | -0.32054600 | 2.29309600  | 0.77369500  |
| O | 0.65841100  | 4.21808900  | 0.43739200  |
| C | -3.26852400 | -0.08195900 | -0.14211200 |
| C | -3.09721200 | 1.19840100  | -0.67807100 |
| C | -3.97182300 | -1.05325100 | -0.86627700 |
| C | -3.62381200 | 1.49873600  | -1.93107700 |
| C | -4.48848000 | -0.74688100 | -2.12044900 |
| H | -4.08601700 | -2.05036500 | -0.45704400 |
| C | -4.31712400 | 0.53021100  | -2.65291900 |
| H | -5.01712300 | -1.50615100 | -2.68499200 |
| H | -4.72093300 | 0.76788600  | -3.63047400 |
| C | 4.27933800  | -0.42328700 | -0.60569400 |
| C | 5.17732000  | -0.21093400 | -1.81142400 |
| H | 4.77167000  | -0.11982200 | 0.32378900  |
| H | 3.97383200  | -1.46239500 | -0.51516700 |
| H | 6.09008600  | -0.80373400 | -1.70450100 |
| H | 4.66993300  | -0.52021600 | -2.72735300 |
| H | 5.47178300  | 0.83815400  | -1.91371900 |
| O | 3.04332200  | 0.32245600  | -0.74073900 |
| H | 3.23136300  | 1.26945200  | -0.78246800 |
| H | -2.55734300 | 1.94888200  | -0.11464800 |
| H | -3.48963900 | 2.49200900  | -2.34311500 |

**U-M2-EtOH-cis**

|   |             |             |             |
|---|-------------|-------------|-------------|
| U | -0.89487700 | -0.12469400 | 0.05893900  |
| O | -0.17183800 | -0.52753600 | -1.49527100 |
| O | 1.05545900  | 0.71455300  | 2.72762200  |
| O | -1.54056700 | 0.34475300  | 1.64858900  |
| O | -3.17704000 | -0.33177300 | -0.93010400 |
| O | -2.29041100 | 1.61947000  | -1.05792300 |
| O | -4.26481600 | 1.27521100  | -1.93351000 |
| N | -3.30561600 | 0.86788300  | -1.34300200 |
| O | -1.94090500 | -2.35883000 | 0.22023700  |
| N | -0.97400400 | -2.97067100 | 0.79370700  |
| H | 0.10667100  | 0.55401100  | 2.83672300  |
| N | 1.31769100  | 0.24900300  | 1.40773900  |
| C | 2.59845600  | 0.26868600  | 1.18091500  |
| N | 3.48203600  | 0.76618000  | 2.08475100  |
| H | 4.44765100  | 0.49604600  | 1.99776000  |

|   |             |             |             |
|---|-------------|-------------|-------------|
| H | 3.13039300  | 0.96887100  | 3.00852500  |
| O | 0.03984000  | -2.20992200 | 1.04411100  |
| O | -0.99812200 | -4.13535500 | 1.07424000  |
| C | 3.14361900  | -0.21470600 | -0.11051100 |
| C | 2.79495900  | -1.47461100 | -0.60716700 |
| C | 4.05601600  | 0.58333200  | -0.81432500 |
| C | 3.34822000  | -1.92335400 | -1.80315000 |
| C | 4.59985900  | 0.12961800  | -2.01097700 |
| H | 4.31993500  | 1.56329200  | -0.43333900 |
| C | 4.24648500  | -1.12486900 | -2.50643800 |
| H | 5.29386500  | 0.75626000  | -2.55907100 |
| H | 4.67112500  | -1.47775200 | -3.43926900 |
| C | 0.14060700  | 3.31405200  | 0.70259600  |
| C | 0.87972500  | 4.52354700  | 0.15872400  |
| H | -0.87255900 | 3.57457100  | 1.02364300  |
| H | 0.66520100  | 2.87116400  | 1.54705200  |
| H | 0.96308200  | 5.28904800  | 0.93527000  |
| H | 1.88544700  | 4.24949500  | -0.16677600 |
| H | 0.34993400  | 4.96747300  | -0.68929600 |
| O | 0.06045600  | 2.25889900  | -0.29228200 |
| H | -0.47406400 | 2.58358800  | -1.03092800 |
| H | 2.10306600  | -2.09705700 | -0.05439500 |
| H | 3.07403900  | -2.89982800 | -2.18429800 |

**U-M1-EtOH**

|   |             |             |             |
|---|-------------|-------------|-------------|
| U | -1.10748900 | 0.07235600  | -0.29035800 |
| O | -1.93025700 | 0.30922000  | -1.82948100 |
| O | -0.08630000 | 2.35678200  | -0.57893500 |
| O | -1.91735000 | 2.31701300  | 0.53540700  |
| O | -0.87863600 | 4.21747700  | 0.24925700  |
| N | -0.95680500 | 3.03380700  | 0.07875900  |
| O | -0.22057300 | -0.14176800 | 1.21571300  |
| O | -0.40508800 | -2.15120400 | -1.17119700 |
| O | -2.21349200 | -2.12314500 | -0.01022700 |
| O | -1.52620900 | -4.00444400 | -0.88381700 |
| O | 1.09472000  | 0.06595300  | -1.59370700 |
| N | -1.38690600 | -2.82912100 | -0.70225600 |
| H | 0.93825900  | -0.51929000 | -2.34660900 |
| O | -3.30797400 | 0.21706300  | 0.96368100  |
| H | -3.46106500 | 1.13200500  | 1.23237700  |
| N | 2.32917100  | -0.51506800 | -1.04151200 |
| C | 3.05208500  | 0.41705000  | -0.50416100 |
| N | 2.80655900  | 1.75281400  | -0.52242300 |
| C | 4.30473400  | -0.05142600 | 0.14816600  |



|   |             |             |             |
|---|-------------|-------------|-------------|
| H | 1.90729700  | 2.08280400  | -0.84651900 |
| H | 3.24657700  | 2.31215300  | 0.18992500  |
| C | 5.45713100  | 0.74343700  | 0.11768600  |
| C | 4.34267300  | -1.29492800 | 0.78954200  |
| C | 6.62821000  | 0.30266300  | 0.72730600  |
| C | 5.51595800  | -1.73053600 | 1.39564100  |
| H | 3.44818500  | -1.90347600 | 0.80885300  |
| C | 6.65952700  | -0.93352100 | 1.36872000  |
| H | 5.53616300  | -2.69244100 | 1.89485000  |
| H | 7.57172800  | -1.27541400 | 1.84436100  |
| H | 5.44522900  | 1.69271200  | -0.40531200 |
| H | 7.51758300  | 0.92134300  | 0.69310600  |
| C | -4.34167200 | -0.64880500 | 1.50046800  |
| C | -4.32776900 | -0.65207500 | 3.01866900  |
| H | -4.12618700 | -1.63332000 | 1.09419500  |
| H | -5.30388400 | -0.31087400 | 1.10431100  |
| H | -5.10528700 | -1.32260500 | 3.39531700  |
| H | -3.36313600 | -0.99752000 | 3.39592000  |
| H | -4.52262400 | 0.34542600  | 3.42434600  |

**U-M1-EtOH-cis**

|   |             |             |             |
|---|-------------|-------------|-------------|
| U | -1.29396900 | -0.10178100 | 0.07640900  |
| O | -2.03580600 | 0.06550900  | 1.66936100  |
| O | -0.47768300 | -2.38163500 | 0.67687500  |
| O | -2.38335500 | -2.31013400 | -0.31027500 |
| O | -1.50120900 | -4.24947200 | 0.17430900  |
| N | -1.46687100 | -3.05184900 | 0.17411800  |
| O | -0.45114800 | -0.24963200 | -1.46276800 |
| O | -2.54968300 | 1.87874000  | -0.75914200 |
| O | -3.50780200 | -0.01748600 | -1.05765600 |
| O | -4.49913000 | 1.80409400  | -1.74616300 |
| O | 0.87905700  | -0.21357300 | 1.40654700  |
| N | -3.57955600 | 1.24590300  | -1.22146000 |
| H | 0.78813300  | 0.02972200  | 2.33508300  |
| O | -0.30783700 | 2.27242600  | 0.36363200  |
| H | -0.99723700 | 2.83828700  | -0.01192400 |
| N | 2.21706300  | 0.26956200  | 1.03814800  |
| C | 2.84787500  | -0.67351100 | 0.40085900  |
| N | 2.42469800  | -1.94303300 | 0.21519900  |
| C | 4.18717000  | -0.29918000 | -0.12700400 |
| H | 1.49641800  | -2.22248600 | 0.51238800  |
| H | 2.85880500  | -2.48887200 | -0.51013200 |
| C | 5.24495700  | -1.21540500 | -0.07865300 |
| C | 4.40060400  | 0.97248100  | -0.66987100 |

|   |             |             |             |
|---|-------------|-------------|-------------|
| C | 6.49830500  | -0.86228100 | -0.56959000 |
| C | 5.65500900  | 1.31961400  | -1.16022100 |
| H | 3.57561200  | 1.67129900  | -0.71329300 |
| C | 6.70512200  | 0.40428300  | -1.11218900 |
| H | 5.81155700  | 2.30349300  | -1.58712500 |
| H | 7.68128200  | 0.67673600  | -1.49674100 |
| H | 5.09325100  | -2.19258700 | 0.36512000  |
| H | 7.31424300  | -1.57405600 | -0.52202200 |
| C | 0.36667000  | 2.98131400  | 1.43238800  |
| C | 0.69257100  | 4.40571100  | 1.01915500  |
| H | 1.27601300  | 2.41401000  | 1.62172000  |
| H | -0.26790300 | 2.96563200  | 2.32532400  |
| H | 1.22884300  | 4.91408700  | 1.82479600  |
| H | 1.32158800  | 4.41551600  | 0.12638900  |
| H | -0.21573500 | 4.98011900  | 0.81178500  |

**U-M6-EtOH**

|   |             |             |             |
|---|-------------|-------------|-------------|
| U | -1.02964300 | 0.04002100  | -0.27579300 |
| O | -0.09414700 | 0.06717300  | 1.22811500  |
| O | 0.93199600  | -0.34247400 | -1.46609700 |
| O | -1.96531900 | 0.01249700  | -1.77312600 |
| O | 0.24144600  | 2.19309900  | -0.84879900 |
| O | -1.63778500 | 2.46057800  | 0.15348400  |
| O | -0.39481000 | 4.20389600  | -0.27921300 |
| N | -0.58254600 | 3.01717700  | -0.32410600 |
| O | -0.45271500 | -2.42511500 | -0.45579700 |
| N | -1.45263700 | -2.88289400 | 0.21007700  |
| N | 2.11421500  | 0.05805300  | -0.98379400 |
| C | 2.93166900  | -0.78409600 | -0.40096200 |
| N | 2.58721100  | -2.07733100 | -0.33275200 |
| H | 1.64528800  | -2.33914700 | -0.61671300 |
| H | 3.05868300  | -2.66458100 | 0.33473900  |
| C | 4.21770000  | -0.29861900 | 0.13358100  |
| C | 4.28340900  | 0.92790500  | 0.80823300  |
| C | 5.37879900  | -1.06603300 | -0.02751000 |
| C | 5.50109700  | 1.38316000  | 1.30290600  |
| H | 3.38138800  | 1.50588000  | 0.97353100  |
| C | 6.59125000  | -0.60502900 | 0.47337000  |
| H | 5.33454700  | -2.00533800 | -0.56642400 |
| C | 6.65470500  | 0.61949600  | 1.13659400  |
| H | 7.48812200  | -1.19791600 | 0.33854800  |
| O | -2.27597800 | -1.97983200 | 0.58970900  |
| O | -1.59699200 | -4.05151200 | 0.45335800  |

|   |             |             |             |
|---|-------------|-------------|-------------|
| H | 5.54486800  | 2.32874500  | 1.82989400  |
| H | 7.60111300  | 0.97601000  | 1.52603100  |
| H | 2.34741200  | 1.03824300  | -1.11074200 |
| O | -3.22721300 | 0.58998000  | 0.94416900  |
| C | -4.55772300 | 0.05902700  | 0.72704800  |
| C | -5.46963000 | 0.37744600  | 1.89877700  |
| H | -4.41666700 | -1.01338300 | 0.61367100  |
| H | -4.95102600 | 0.46074800  | -0.21227700 |
| H | -6.45752700 | -0.06125300 | 1.73257000  |
| H | -5.06122900 | -0.03087600 | 2.82543200  |
| H | -5.60134500 | 1.45696300  | 2.02250100  |
| H | -3.26568400 | 1.55310400  | 1.01754200  |

### U-M6-EtOH-cis

|   |             |             |             |
|---|-------------|-------------|-------------|
| U | -1.12692500 | -0.24140600 | -0.09709600 |
| O | -0.36416800 | -0.27313000 | 1.50791500  |
| O | 0.62873200  | 1.39748200  | -0.59191200 |
| O | -1.81133100 | -0.14891400 | -1.72387700 |
| O | -3.33490000 | 0.28085800  | 0.90786300  |
| O | -2.91581200 | -1.80988300 | 0.62236900  |
| O | -4.83292000 | -1.20488900 | 1.47794700  |
| N | -3.75462100 | -0.93267200 | 1.02733900  |
| O | 0.96137600  | -1.28242600 | -1.02506800 |
| N | 0.59242700  | -2.51409300 | -0.90797100 |
| N | 1.79335700  | 1.17817800  | 0.04216500  |
| C | 2.89857300  | 0.96209300  | -0.62364700 |
| N | 2.88325700  | 1.11959000  | -1.95743900 |
| H | 1.95970000  | 1.21823100  | -2.36308500 |
| H | 3.57541700  | 0.62257200  | -2.49489800 |
| C | 4.13227000  | 0.60147900  | 0.09588100  |
| C | 4.08906500  | -0.34738700 | 1.12583800  |
| C | 5.35198500  | 1.19161700  | -0.26072800 |
| C | 5.25655500  | -0.68779100 | 1.80112700  |
| H | 3.15611700  | -0.84309200 | 1.36700900  |
| C | 6.51380300  | 0.84399400  | 0.41916600  |
| H | 5.38193800  | 1.93403900  | -1.04975000 |
| C | 6.46700300  | -0.09308700 | 1.45061100  |
| H | 7.45466300  | 1.30800900  | 0.14809100  |
| O | -0.57531400 | -2.66121600 | -0.41894800 |
| O | 1.30005200  | -3.43137400 | -1.23204600 |
| H | 5.22181000  | -1.42926600 | 2.59014300  |
| H | 7.37498200  | -0.36367600 | 1.97675000  |
| H | 1.76261500  | 1.08770700  | 1.05372500  |
| O | -1.68389300 | 2.25665500  | 0.08768300  |

|   |             |            |             |
|---|-------------|------------|-------------|
| C | -2.83695300 | 3.01567900 | -0.34005400 |
| C | -2.84430400 | 4.39992200 | 0.28578300  |
| H | -3.69426400 | 2.42968400 | -0.01599100 |
| H | -2.84599200 | 3.06781900 | -1.43385800 |
| H | -3.74451300 | 4.94270900 | -0.01606800 |
| H | -2.83429900 | 4.32773500 | 1.37530500  |
| H | -1.97791600 | 4.98903600 | -0.03151700 |
| H | -0.85663700 | 2.65640900 | -0.22098400 |

### U-M2-M2

|   |             |             |             |
|---|-------------|-------------|-------------|
| U | 0.00001400  | 0.03484400  | -0.00002900 |
| O | 0.92021100  | 0.04254400  | 1.51874000  |
| O | 1.50759900  | -0.16587600 | -3.03085400 |
| O | -0.91996200 | 0.04312900  | -1.51889400 |
| O | 0.91820300  | 2.30775400  | -0.55709400 |
| O | -0.91865500 | 2.30740200  | 0.55761500  |
| O | -0.00041900 | 4.21132400  | 0.00052600  |
| N | -0.00028800 | 3.01048200  | 0.00036200  |
| O | 0.93675800  | -2.21929300 | -0.52640900 |
| N | -0.00013200 | -2.92292100 | -0.00122000 |
| H | 0.55020800  | -0.05185500 | -2.96277100 |
| N | 1.95857300  | -0.00194200 | -1.69620300 |
| C | 3.23704400  | -0.22845000 | -1.62866500 |
| N | 3.95076300  | -0.65919600 | -2.69663500 |
| H | 3.47573400  | -0.72745400 | -3.58290400 |
| H | 4.95121800  | -0.56262800 | -2.68589300 |
| C | 3.96121600  | -0.04664900 | -0.34776400 |
| C | 4.79256000  | -1.07002100 | 0.12593900  |
| C | 3.85326400  | 1.14972200  | 0.36861000  |
| C | 5.50053600  | -0.89888300 | 1.31059800  |
| H | 4.85836700  | -2.00370400 | -0.42039100 |
| C | 4.57000100  | 1.31500700  | 1.55057100  |
| H | 3.21435300  | 1.94073700  | -0.00294800 |
| C | 5.39207400  | 0.29479100  | 2.02294000  |
| H | 4.48470100  | 2.24427100  | 2.10169600  |
| O | -0.93674600 | -2.21957600 | 0.52491400  |
| O | -0.00037400 | -4.12324700 | -0.00198300 |
| H | 6.13023000  | -1.69930000 | 1.68161500  |
| H | 5.94621100  | 0.42715200  | 2.94530200  |
| N | -1.95827400 | -0.00282100 | 1.69626100  |
| O | -1.50688800 | -0.16790000 | 3.03069000  |
| C | -3.23672000 | -0.22965800 | 1.62882400  |
| N | -3.95001900 | -0.66140600 | 2.69660600  |

|   |             |             |             |
|---|-------------|-------------|-------------|
| H | -0.54966800 | -0.05275100 | 2.96233600  |
| H | -4.95053500 | -0.56554500 | 2.68618800  |
| C | -3.96115400 | -0.04694700 | 0.34823300  |
| C | -3.85353700 | 1.14999400  | -0.36721000 |
| C | -4.79240700 | -1.07008400 | -0.12615000 |
| C | -4.57050800 | 1.31610000  | -1.54891100 |
| H | -3.21475200 | 1.94089300  | 0.00483200  |
| C | -5.50061900 | -0.89813300 | -1.31056100 |
| H | -4.85794100 | -2.00423100 | 0.41941300  |
| C | -5.39248900 | 0.29612400  | -2.02196900 |
| H | -4.48546800 | 2.24581400  | -2.09931900 |
| H | -6.13023800 | -1.69838000 | -1.68206700 |
| H | -5.94679400 | 0.42914600  | -2.94413300 |
| H | -3.47464900 | -0.73078800 | 3.58259700  |

### U-M2-M2-cis

|   |             |             |             |
|---|-------------|-------------|-------------|
| U | -0.00047600 | -0.99170900 | -0.00055200 |
| O | -1.23177000 | -0.91439300 | 1.27668500  |
| O | 0.19238300  | 1.67014800  | -2.09241600 |
| O | 1.23095500  | -0.91639600 | -1.27778500 |
| O | 0.93189800  | -3.12259900 | 0.88232700  |
| O | 1.73796200  | -1.33701600 | 1.76240600  |
| O | 2.48486300  | -3.28778400 | 2.41047300  |
| N | 1.75708900  | -2.62683700 | 1.72279800  |
| O | -0.93664200 | -3.12048500 | -0.88343200 |
| N | -1.76290500 | -2.62323100 | -1.72208900 |
| H | 0.75689300  | 0.89853300  | -2.23989800 |
| N | -0.80193100 | 1.19542200  | -1.19441600 |
| C | -1.72672100 | 2.09624200  | -1.04605200 |
| N | -1.64098600 | 3.31996400  | -1.63334700 |
| H | -0.91449800 | 3.44574100  | -2.32191700 |
| H | -2.49133100 | 3.84644900  | -1.74545500 |
| C | -2.90673000 | 1.84629200  | -0.18018100 |
| C | -3.24089500 | 2.78528800  | 0.80537400  |
| C | -3.71529900 | 0.72144400  | -0.36990600 |
| C | -4.36582800 | 2.59205900  | 1.59974400  |
| H | -2.60387900 | 3.64782100  | 0.96008400  |
| C | -4.84226500 | 0.53758000  | 0.42738100  |
| H | -3.45929500 | 0.00082500  | -1.13535200 |
| C | -5.16896100 | 1.46781800  | 1.41083400  |
| H | -5.46520000 | -0.33620500 | 0.27650900  |
| O | -1.74105300 | -1.33353500 | -1.76212500 |
| O | -2.49382100 | -3.28288300 | -2.40764100 |
| H | -4.61262500 | 3.31459700  | 2.36919800  |

|   |             |             |             |
|---|-------------|-------------|-------------|
| H | -6.04595800 | 1.31804500  | 2.03020100  |
| N | 0.80422200  | 1.19366900  | 1.19450000  |
| O | -0.18890600 | 1.66857900  | 2.09366500  |
| C | 1.73030900  | 2.09330700  | 1.04696200  |
| N | 1.64666300  | 3.31625400  | 1.63608500  |
| H | -0.75520000 | 0.89787800  | 2.23936500  |
| H | 2.49753100  | 3.84186100  | 1.74813500  |
| C | 2.90971500  | 1.84266800  | 0.18052200  |
| C | 3.71520800  | 0.71506600  | 0.36715000  |
| C | 3.24655400  | 2.78346000  | -0.80238400 |
| C | 4.84179900  | 0.53040800  | -0.43043100 |
| H | 3.45695300  | -0.00702400 | 1.13045100  |
| C | 4.37115900  | 2.58947000  | -1.59706700 |
| H | 2.61184600  | 3.64808200  | -0.95494300 |
| C | 5.17125500  | 1.46259400  | -1.41114900 |
| H | 5.46233600  | -0.34549100 | -0.28195900 |
| H | 4.61999400  | 3.31351700  | -2.36444400 |
| H | 6.04800900  | 1.31220900  | -2.03071100 |
| H | 0.92038900  | 3.44244600  | 2.32477700  |

### U-M1-M1-cis

|   |             |             |             |
|---|-------------|-------------|-------------|
| U | -1.87391300 | -0.10467500 | -0.05889900 |
| O | -2.15640900 | -1.24288300 | -1.37340900 |
| O | -1.69186900 | 1.71509000  | -1.73675400 |
| O | -3.64532200 | 1.42153900  | -0.89150000 |
| O | -3.33783100 | 3.01589500  | -2.35438800 |
| N | -2.92509700 | 2.10334200  | -1.69613100 |
| O | -1.50701800 | 1.00618000  | 1.25859400  |
| O | -2.53653700 | -1.88657600 | 1.54855000  |
| O | -4.12486400 | -0.60556800 | 0.86796000  |
| O | -4.58072700 | -2.24931700 | 2.23219800  |
| O | 0.48476100  | 0.18876400  | -0.97050500 |
| N | -3.80118400 | -1.61228100 | 1.58312700  |
| H | 0.80461900  | -0.74548800 | -1.01955700 |
| O | -0.12180600 | -1.92375300 | 0.81632400  |
| N | 0.97503500  | -2.29686800 | -0.07618700 |
| C | 2.08417000  | -2.35232700 | 0.61431400  |
| N | 2.17975600  | -2.12152000 | 1.93333800  |
| C | 3.31337800  | -2.70007100 | -0.14167000 |
| H | 3.04789400  | -2.26103400 | 2.41840900  |
| H | 1.36610900  | -1.79706400 | 2.43142500  |
| C | 4.51991000  | -2.04639500 | 0.13542500  |
| C | 3.26524000  | -3.67157500 | -1.14751400 |
| C | 5.66818500  | -2.37211800 | -0.57957600 |

|   |             |             |             |
|---|-------------|-------------|-------------|
| C | 4.41730300  | -3.99430200 | -1.85666600 |
| H | 2.32660300  | -4.16628200 | -1.36119400 |
| C | 5.61951100  | -3.34851300 | -1.57259700 |
| H | 4.37685500  | -4.75177700 | -2.63059400 |
| H | 6.51544400  | -3.60161400 | -2.12774200 |
| H | -0.69910400 | -2.70144100 | 0.86615000  |
| N | 1.52646100  | 0.80144500  | -0.15170400 |
| C | 1.69024100  | 2.04134300  | -0.49111900 |
| N | 1.07932500  | 2.68978500  | -1.51763600 |
| C | 2.69810800  | 2.79583100  | 0.30249600  |
| H | 0.27609200  | 2.24956900  | -1.94834600 |
| H | 1.03183300  | 3.69432300  | -1.45541800 |
| C | 3.52630700  | 3.73713800  | -0.32070300 |
| C | 2.82825400  | 2.57047000  | 1.67765500  |
| C | 4.46953500  | 4.44192400  | 0.42201800  |
| C | 3.77155400  | 3.27824900  | 2.41551000  |
| H | 2.17551800  | 1.85087700  | 2.15435000  |
| C | 4.59357200  | 4.21526300  | 1.79092800  |
| H | 3.85772700  | 3.10713800  | 3.48260000  |
| H | 5.32478600  | 4.76857800  | 2.36918100  |
| H | 6.59708900  | -1.85519200 | -0.36910300 |
| H | 4.55054700  | -1.25660700 | 0.87693400  |
| H | 3.44694500  | 3.89993500  | -1.38927000 |
| H | 5.11031100  | 5.16439700  | -0.07033600 |

**U-M1-M1**

|   |             |             |             |
|---|-------------|-------------|-------------|
| U | 0.01118200  | 0.01332100  | 0.01998400  |
| O | 1.03093600  | 0.04325300  | -1.41567500 |
| N | -3.37082600 | -0.58226500 | -0.99728900 |
| O | 0.93358200  | -2.20720300 | 0.67212100  |
| C | -4.11807400 | 0.42282500  | -0.65857900 |
| O | -2.06545400 | -0.09893700 | -1.48018300 |
| O | -0.66805500 | -2.28102800 | -0.75430400 |
| N | 0.20394700  | -2.94434000 | -0.09645700 |
| O | 0.33922300  | -4.13219700 | -0.17757800 |
| O | -1.00478700 | -0.01280500 | 1.45674000  |
| N | 3.38624700  | 0.58838300  | 1.03551200  |
| O | -0.90182000 | 2.23503100  | -0.65177000 |
| C | 4.12469400  | -0.43352300 | 0.73324400  |
| O | 2.07771300  | 0.13128300  | 1.53338200  |
| O | 0.69642100  | 2.31441600  | 0.77845000  |
| N | -0.17504500 | 2.97482400  | 0.11769700  |
| O | -0.31122100 | 4.16291100  | 0.19423700  |
| H | 1.87464600  | 0.82955600  | 2.17001700  |

|   |             |             |             |
|---|-------------|-------------|-------------|
| H | -1.84796700 | -0.78917700 | -2.12088400 |
| N | 3.82329500  | -1.74367500 | 0.92444600  |
| H | 2.87397300  | -1.99639500 | 1.16717400  |
| H | 4.32242100  | -2.41568500 | 0.36454600  |
| C | 5.46214700  | -0.10202500 | 0.17071600  |
| C | 6.56893500  | -0.90917100 | 0.46136100  |
| C | 5.62660400  | 1.02455000  | -0.64325100 |
| C | 7.82035600  | -0.59663100 | -0.06153600 |
| C | 6.87949700  | 1.33213400  | -1.16229200 |
| H | 4.76721500  | 1.64408800  | -0.86321500 |
| C | 7.97791100  | 0.52286200  | -0.87533900 |
| H | 6.99771000  | 2.20311600  | -1.79654900 |
| H | 8.95276800  | 0.76468000  | -1.28324500 |
| N | -3.77076200 | 1.72877300  | -0.64042200 |
| H | -4.49168100 | 2.42344500  | -0.55406800 |
| H | -2.84302800 | 2.02946300  | -0.90961400 |
| C | -5.49319300 | 0.06322000  | -0.21147200 |
| C | -6.11413300 | 0.78198200  | 0.81678000  |
| C | -6.17397900 | -1.00074800 | -0.81371400 |
| C | -7.40105500 | 0.44675500  | 1.22859300  |
| C | -7.45902000 | -1.33177900 | -0.39882100 |
| H | -5.68608400 | -1.55786300 | -1.60269200 |
| C | -8.07694700 | -0.60812900 | 0.62016300  |
| H | -7.98081200 | -2.15462400 | -0.87377800 |
| H | -9.07929200 | -0.86797600 | 0.94099200  |
| H | 8.67290100  | -1.22318400 | 0.17416300  |
| H | 6.45657200  | -1.76455300 | 1.11748100  |
| H | -5.58063000 | 1.58214900  | 1.31691000  |
| H | -7.87019000 | 1.00381900  | 2.03138000  |

**U-M1-M2**

|   |             |             |             |
|---|-------------|-------------|-------------|
| U | 0.37950800  | 0.30962000  | -0.00475100 |
| O | -0.40095100 | 0.92266200  | 1.46562100  |
| O | -1.77230900 | 0.68894000  | -1.45763800 |
| O | 1.18554300  | -0.30476300 | -1.44414100 |
| O | 1.89835600  | 2.31913500  | -0.09651400 |
| O | 0.04796600  | 2.48788900  | -1.16851400 |
| O | 1.47925500  | 4.13874000  | -1.23191300 |
| N | 1.16755600  | 3.04598200  | -0.85158900 |
| O | 0.58933000  | -1.95559500 | 1.06315900  |
| N | -0.49805100 | -2.45248300 | 0.60018800  |
| H | -1.60678900 | 1.57900600  | -1.80266100 |
| N | -3.04912900 | 0.85863200  | -0.75746500 |

|   |             |             |             |
|---|-------------|-------------|-------------|
| C | -3.81710000 | -0.15470300 | -1.00526000 |
| N | -3.56111200 | -1.15732700 | -1.89584500 |
| H | -2.60509000 | -1.20292000 | -2.21699600 |
| H | -3.96312400 | -2.05505100 | -1.67219000 |
| C | -5.12218200 | -0.16867000 | -0.29523300 |
| C | -6.25235400 | -0.72818700 | -0.90401500 |
| C | -5.23365700 | 0.38568900  | 0.98554000  |
| C | -7.47427200 | -0.73754100 | -0.23765500 |
| H | -6.17966300 | -1.13163700 | -1.90715700 |
| C | -6.45730600 | 0.37492300  | 1.64556700  |
| H | -4.35512100 | 0.81361200  | 1.45032900  |
| C | -7.57913800 | -0.18773600 | 1.03800200  |
| H | -6.53447300 | 0.80131000  | 2.63916000  |
| O | -1.17979200 | -1.62979800 | -0.11406400 |
| O | -0.84995100 | -3.58125700 | 0.80916100  |
| H | -8.34557700 | -1.16698800 | -0.71873400 |
| H | -8.53111800 | -0.19697800 | 1.55664200  |
| N | 2.36591400  | 0.19308600  | 1.60621400  |
| O | 2.09729100  | 0.82780200  | 2.84645000  |
| C | 3.64833200  | 0.00449100  | 1.47539500  |
| H | 1.14070600  | 0.96702700  | 2.82912800  |
| N | 4.53637700  | 0.46706100  | 2.38301700  |
| H | 4.18100200  | 0.92247700  | 3.20890900  |
| H | 5.47598600  | 0.11066400  | 2.38056800  |
| C | 4.18337800  | -0.71705900 | 0.29614000  |
| C | 3.69274800  | -1.98040000 | -0.04918100 |
| C | 5.22031800  | -0.14307200 | -0.45068600 |
| C | 4.23619300  | -2.65866200 | -1.13651200 |
| H | 2.89392200  | -2.42310100 | 0.53217000  |
| C | 5.75281000  | -0.82468200 | -1.53960600 |
| H | 5.58461100  | 0.84466900  | -0.19309600 |
| C | 5.26280100  | -2.08419600 | -1.88208600 |
| H | 3.85477900  | -3.63811900 | -1.40036200 |
| H | 6.54363100  | -0.37006000 | -2.12489200 |
| H | 5.67941200  | -2.61481300 | -2.73065000 |

**U-M1-M2-cis**

|   |             |             |             |
|---|-------------|-------------|-------------|
| U | -1.41856400 | -0.65483900 | -0.10848900 |
| O | -1.00996100 | -1.81730400 | -1.36614300 |
| O | 0.95181600  | -1.38213100 | 1.02278000  |
| O | -1.76394100 | 0.48547200  | 1.19067000  |
| O | -3.67428700 | -0.33347700 | -1.06414800 |
| O | -2.15880600 | 0.98681300  | -1.83035600 |

|   |             |             |             |
|---|-------------|-------------|-------------|
| O | -4.21480500 | 1.17214800  | -2.55239300 |
| N | -3.39972800 | 0.63416400  | -1.85538100 |
| O | -3.17239200 | -2.24490100 | 0.74307300  |
| N | -2.43086600 | -2.92427400 | 1.52091400  |
| H | 0.69845400  | -2.30421500 | 1.19535500  |
| N | 2.16894500  | -1.45815800 | 0.23929300  |
| C | 3.13206000  | -0.85367000 | 0.87312600  |
| N | 2.98689300  | -0.20464000 | 2.05419900  |
| H | 2.09079700  | -0.28983500 | 2.51147300  |
| H | 3.79924300  | -0.05029800 | 2.62748400  |
| C | 4.46313900  | -0.84489500 | 0.21515000  |
| C | 5.32917800  | 0.24436700  | 0.37388600  |
| C | 4.85837800  | -1.92959000 | -0.57741100 |
| C | 6.57532900  | 0.24378100  | -0.24604100 |
| H | 5.01778100  | 1.10403000  | 0.95553300  |
| C | 6.10356700  | -1.92359900 | -1.19584800 |
| H | 4.18629000  | -2.76951600 | -0.69587400 |
| C | 6.96495500  | -0.83985000 | -1.03012700 |
| H | 6.40444100  | -2.76861500 | -1.80393200 |
| O | -1.20655700 | -2.50219000 | 1.56971100  |
| O | -2.80907000 | -3.86562100 | 2.16071100  |
| H | 7.23771100  | 1.09277500  | -0.12309600 |
| H | 7.93596100  | -0.83947500 | -1.51177300 |
| N | 0.53244900  | 0.84702800  | -0.87669400 |
| O | 1.30212200  | 0.17247400  | -1.87175400 |
| C | 0.95222000  | 2.07418700  | -0.73478900 |
| H | 1.63811000  | -0.61666800 | -1.39594900 |
| N | 2.05720900  | 2.53097800  | -1.36803100 |
| H | 2.46029000  | 1.92476100  | -2.06799300 |
| H | 2.19939800  | 3.52432300  | -1.43394300 |
| C | 0.26660900  | 3.02578400  | 0.17910200  |
| C | -1.06470900 | 3.39683700  | -0.02539000 |
| C | 0.99653800  | 3.59601500  | 1.23016000  |
| C | -1.65999400 | 4.32558100  | 0.82423100  |
| H | -1.62227900 | 2.95992900  | -0.84340400 |
| C | 0.39151900  | 4.51569600  | 2.08022500  |
| H | 2.02719200  | 3.30004000  | 1.38969100  |
| C | -0.93795800 | 4.88257000  | 1.87654700  |
| H | -2.69326600 | 4.60945300  | 0.66316700  |
| H | 0.95500900  | 4.94317700  | 2.90168200  |
| H | -1.40947600 | 5.60009200  | 2.53832300  |

**U-M6-M6**

|   |             |             |             |
|---|-------------|-------------|-------------|
| U | -0.02018500 | 0.15081200  | -0.01989300 |
| O | -1.00812000 | -0.13291800 | 1.42650800  |
| O | -1.89852600 | -0.15997600 | -1.40584900 |
| O | 1.03308500  | 0.42427400  | -1.43692900 |
| O | -0.54008600 | -2.27566700 | -0.68615400 |
| O | 1.25021000  | -2.03778100 | 0.47317200  |
| O | 0.56541700  | -4.04862000 | -0.03967200 |
| N | 0.43716300  | -2.84882200 | -0.07870700 |
| O | -1.46790100 | 2.22661100  | -0.40359500 |
| N | -0.76812200 | 3.05574700  | 0.28539800  |
| N | -3.12901100 | 0.13882800  | -0.98240000 |
| C | -3.96840600 | -0.81250300 | -0.64560800 |
| N | -3.54288500 | -2.07978800 | -0.65898200 |
| H | -2.56063400 | -2.27743900 | -0.84786900 |
| H | -4.20266900 | -2.83278000 | -0.57738300 |
| C | -5.34523800 | -0.46347800 | -0.24887000 |
| C | -6.04698300 | 0.54097300  | -0.92838500 |
| C | -5.95832200 | -1.13312400 | 0.81855300  |
| C | -7.33933800 | 0.87479700  | -0.53713400 |
| H | -5.59129500 | 1.04016900  | -1.77543000 |
| C | -7.25225600 | -0.79728900 | 1.20086400  |
| H | -5.40891800 | -1.88945300 | 1.36693500  |
| C | -7.94432700 | 0.20666500  | 0.52534700  |
| H | -7.71616200 | -1.31181700 | 2.03412500  |
| O | 0.30352100  | 2.55734700  | 0.76396200  |
| O | -1.10055300 | 4.20286200  | 0.45435900  |
| H | -7.87724900 | 1.65006000  | -1.06981800 |
| H | -8.95234500 | 0.46716300  | 0.82636800  |
| H | -3.31469800 | 1.12227300  | -0.79529700 |
| O | 2.01854700  | 0.45291000  | 1.15901000  |
| N | 3.15110800  | 0.40646800  | 0.45639100  |
| C | 4.27692700  | 0.05321000  | 1.02232900  |
| H | 3.06596500  | 0.52638600  | -0.55266300 |
| N | 4.24042900  | -0.33028700 | 2.31108800  |
| C | 5.52861600  | 0.04884600  | 0.24802200  |
| H | 3.33679500  | -0.27092900 | 2.76372100  |
| H | 5.07769400  | -0.29529100 | 2.86620500  |
| C | 5.78977000  | 1.05717300  | -0.68987000 |
| C | 6.46805500  | -0.97265000 | 0.44544900  |
| C | 6.96901700  | 1.03341400  | -1.42672100 |
| H | 5.08621500  | 1.87095700  | -0.82183200 |
| C | 7.64718200  | -0.98555400 | -0.29102000 |
| H | 6.25692700  | -1.76849900 | 1.14992800  |
| C | 7.89908400  | 0.01482500  | -1.22861200 |

|   |            |             |             |
|---|------------|-------------|-------------|
| H | 7.16614400 | 1.81804300  | -2.14748600 |
| H | 8.36456600 | -1.78376600 | -0.14111300 |
| H | 8.81845500 | 0.00101400  | -1.80226600 |

### U-M6-M6-cis

|   |             |             |             |
|---|-------------|-------------|-------------|
| U | -0.00002200 | 0.58176900  | -0.00012200 |
| O | -0.96383300 | 0.56775700  | -1.50106700 |
| O | -1.31640700 | -1.37971800 | 0.41956700  |
| O | 0.96381300  | 0.56875700  | 1.50077700  |
| O | -2.07521500 | 0.97525200  | 1.40988000  |
| O | -1.13104600 | 2.75803100  | 0.67158100  |
| O | -2.95034600 | 2.92281600  | 1.86982800  |
| N | -2.08992800 | 2.26083100  | 1.34159200  |
| O | 2.07581300  | 0.97486900  | -1.41007400 |
| N | 2.09023700  | 2.26040700  | -1.34173100 |
| N | -2.54420600 | -1.36902900 | -0.11009500 |
| C | -3.60994600 | -1.49700600 | 0.63933300  |
| N | -3.44867800 | -1.68969500 | 1.95519100  |
| H | -2.54245600 | -1.44357900 | 2.33375300  |
| H | -4.25433200 | -1.67605700 | 2.55579100  |
| C | -4.94928700 | -1.43219200 | 0.02374700  |
| C | -5.25906900 | -2.20604900 | -1.10062700 |
| C | -5.91018400 | -0.56420800 | 0.55931000  |
| C | -6.52042300 | -2.11188700 | -1.68145500 |
| H | -4.52294400 | -2.89293900 | -1.50185200 |
| C | -7.16778300 | -0.47627400 | -0.02716300 |
| H | -5.65371000 | 0.07030900  | 1.40017800  |
| C | -7.47501300 | -1.25034500 | -1.14544200 |
| H | -7.90309600 | 0.20705200  | 0.38077700  |
| O | 1.13047700  | 2.75741100  | -0.67275100 |
| O | 2.95110900  | 2.92261900  | -1.86891700 |
| H | -6.75892700 | -2.71700800 | -2.54817100 |
| H | -8.45617500 | -1.17885200 | -1.60022500 |
| H | -2.62340800 | -1.06419600 | -1.07805400 |
| O | 1.31623900  | -1.38000100 | -0.41849700 |
| N | 2.54417700  | -1.36918500 | 0.11073700  |
| C | 3.60973300  | -1.49739200 | -0.63888100 |
| H | 2.62369000  | -1.06476600 | 1.07878600  |
| N | 3.44821400  | -1.69047000 | -1.95465500 |
| C | 4.94920300  | -1.43233100 | -0.02357300 |
| H | 2.54196400  | -1.44427500 | -2.33309100 |
| H | 4.25375000  | -1.67629500 | -2.55540200 |
| C | 5.25938200  | -2.20619000 | 1.10069100  |

|   |            |             |             |
|---|------------|-------------|-------------|
| C | 5.90979100 | -0.56409300 | -0.55926300 |
| C | 6.52082900 | -2.11179000 | 1.68127700  |
| H | 4.52349600 | -2.89328100 | 1.50201700  |
| C | 7.16748900 | -0.47592100 | 0.02696800  |
| H | 5.65300200 | 0.07045700  | -1.40001100 |
| C | 7.47512000 | -1.24999900 | 1.14512900  |
| H | 6.75963500 | -2.71691500 | 2.54790700  |
| H | 7.90256000 | 0.20760800  | -0.38106800 |
| H | 8.45635500 | -1.17831100 | 1.59972200  |

**U-M2-M6**

|   |             |             |             |
|---|-------------|-------------|-------------|
| U | -0.31427200 | 0.11912500  | -0.14628100 |
| O | 0.67233700  | -0.12954500 | 1.32416700  |
| O | 1.59907800  | 0.58723700  | -1.41385000 |
| O | -1.33166400 | 0.36302800  | -1.56536900 |
| O | -0.97949100 | -2.32551600 | -0.06647100 |
| O | 0.87342900  | -1.92588100 | -1.07575000 |
| O | 0.19505800  | -3.99128800 | -0.85335400 |
| N | 0.03381200  | -2.81222600 | -0.67337100 |
| O | -1.36980000 | 2.15718800  | 0.96215600  |
| N | -0.49110300 | 3.02529100  | 0.63019200  |
| N | 2.77605600  | 0.04057600  | -1.09336900 |
| C | 3.70962900  | 0.75058300  | -0.51028300 |
| N | 3.47673600  | 2.05181300  | -0.28175900 |
| H | 2.53294700  | 2.39849000  | -0.44462300 |
| H | 4.04593800  | 2.52877000  | 0.39719300  |
| C | 4.99435200  | 0.12079400  | -0.15318100 |
| C | 6.19389000  | 0.82076600  | -0.33830300 |
| C | 5.02199700  | -1.17504000 | 0.37941000  |
| C | 7.40496200  | 0.22625700  | -0.00140200 |
| H | 6.17710900  | 1.81528600  | -0.76878900 |
| C | 6.23799700  | -1.76361400 | 0.71054700  |
| H | 4.09521200  | -1.70677100 | 0.56170200  |
| C | 7.42919400  | -1.06555200 | 0.52167400  |
| H | 6.25267000  | -2.76348600 | 1.12753000  |
| O | 0.45409400  | 2.55043000  | -0.09880800 |
| O | -0.54025300 | 4.17940500  | 0.96876600  |
| H | 8.33039700  | 0.76866200  | -0.15481200 |
| H | 8.37445400  | -1.52619800 | 0.78391700  |
| N | -2.20790900 | -0.47196500 | 1.54760600  |
| O | -1.66936800 | -0.90925600 | 2.78526500  |
| C | -3.47067700 | -0.77019900 | 1.48092500  |
| H | -0.73102300 | -0.68764600 | 2.70949400  |

|   |             |             |             |
|---|-------------|-------------|-------------|
| N | -4.09394000 | -1.49600200 | 2.44365400  |
| H | -3.56420000 | -1.72254300 | 3.27074700  |
| H | -5.09611000 | -1.45083000 | 2.50971100  |
| C | -4.27826200 | -0.34448000 | 0.31297700  |
| C | -4.25761900 | 0.98429300  | -0.12311000 |
| C | -5.09814900 | -1.27730500 | -0.33568100 |
| C | -5.04664700 | 1.36996200  | -1.20296500 |
| H | -3.62925300 | 1.70551100  | 0.38383800  |
| C | -5.87996500 | -0.88464400 | -1.41664900 |
| H | -5.09703100 | -2.31063700 | -0.00879000 |
| C | -5.85610600 | 0.43999400  | -1.85073300 |
| H | -5.02575700 | 2.40019800  | -1.53859100 |
| H | -6.49958600 | -1.61376600 | -1.92596100 |
| H | -6.46496100 | 0.74464000  | -2.69448100 |
| H | 2.90169800  | -0.93885800 | -1.33430200 |

**U-M2-M6-cis**

|   |             |             |             |
|---|-------------|-------------|-------------|
| U | 0.73727700  | -0.97338800 | 0.03193800  |
| O | 1.85571300  | -0.68466700 | -1.30032700 |
| O | -0.52756400 | 1.64177200  | 1.86563800  |
| O | -0.40399500 | -1.16152900 | 1.39564400  |
| O | 0.67109800  | -3.46048900 | -0.40862100 |
| O | -0.76278500 | -2.30356300 | -1.50568500 |
| O | -0.73116600 | -4.47866200 | -1.74035700 |
| N | -0.29036400 | -3.47699500 | -1.24139200 |
| O | 2.45907000  | -2.39106300 | 1.18143200  |
| N | 3.02831700  | -1.46640600 | 1.85081000  |
| H | -0.56129400 | 0.73575800  | 2.21108800  |
| N | 0.59084800  | 1.57969100  | 0.96707600  |
| C | 0.99360500  | 2.77738900  | 0.68007800  |
| N | 0.36627700  | 3.89638600  | 1.14974500  |
| H | -0.28146000 | 3.75426100  | 1.91076100  |
| H | 0.90872600  | 4.74493400  | 1.17062700  |
| C | 2.13703600  | 2.97354400  | -0.24423700 |
| C | 2.03755400  | 3.92964300  | -1.26449200 |
| C | 3.31946400  | 2.24248700  | -0.09007900 |
| C | 3.10771100  | 4.14344300  | -2.12642900 |
| H | 1.11479900  | 4.48291800  | -1.39602900 |
| C | 4.38677300  | 2.46607800  | -0.95521900 |
| H | 3.39861800  | 1.51156800  | 0.70422800  |
| C | 4.28447500  | 3.41237600  | -1.97202700 |
| H | 5.30007200  | 1.89599200  | -0.83236200 |
| O | 2.49549100  | -0.30169000 | 1.68825100  |

|   |             |             |             |
|---|-------------|-------------|-------------|
| O | 3.97348200  | -1.65031200 | 2.56999700  |
| H | 3.01980500  | 4.87303100  | -2.92321600 |
| H | 5.11778100  | 3.57820600  | -2.64529700 |
| N | -2.06717700 | 0.68163800  | -0.47307500 |
| O | -0.91895800 | 0.29883700  | -1.04289000 |
| C | -3.21613100 | 0.15252600  | -0.81625700 |
| N | -3.24921300 | -0.78361100 | -1.77611300 |
| H | -2.36367000 | -1.21312800 | -2.04146700 |
| H | -4.06993300 | -1.36459000 | -1.83137000 |
| C | -4.45714800 | 0.63561300  | -0.17755200 |
| C | -4.49540000 | 0.89755300  | 1.19810400  |
| C | -5.61014100 | 0.82572600  | -0.95069000 |
| C | -5.66990200 | 1.35448800  | 1.78702600  |
| H | -3.61990500 | 0.71403400  | 1.80965700  |
| C | -6.78113000 | 1.28071500  | -0.35415000 |
| H | -5.57953700 | 0.64143300  | -2.01824300 |
| C | -6.81285700 | 1.54702200  | 1.01359200  |
| H | -5.69550900 | 1.54612900  | 2.85315000  |
| H | -7.66719800 | 1.43335200  | -0.95888300 |
| H | -7.72736200 | 1.89935200  | 1.47616500  |
| H | -2.00074900 | 1.40280200  | 0.24289000  |

**U-M5-M5-NO3**

|   |             |             |             |
|---|-------------|-------------|-------------|
| U | -0.00230400 | -0.94300900 | -0.13214400 |
| O | -0.87778900 | -1.02864100 | 1.37876000  |
| O | 0.87417100  | -0.83618400 | -1.64085400 |
| O | -0.01890600 | -3.34353300 | -0.33916000 |
| H | 0.46106100  | -3.75420600 | -1.07404600 |
| C | -0.70800000 | -4.42284100 | 0.44229400  |
| C | 0.25991600  | -5.51537000 | 0.82781000  |
| H | -1.51898600 | -4.78756700 | -0.18923100 |
| H | -1.12606800 | -3.90273200 | 1.30221700  |
| H | -0.28296700 | -6.28181700 | 1.38733500  |
| H | 0.69353300  | -6.00414300 | -0.04910700 |
| H | 1.06243400  | -5.14322800 | 1.46764200  |
| O | -2.13669200 | -1.22727000 | -1.38170200 |
| N | -3.27385900 | -0.39721600 | -1.02162800 |
| C | -2.87045500 | 0.78227700  | -0.71526400 |
| N | -1.46874700 | 1.13154700  | -0.87790700 |
| C | -3.81388300 | 1.76347500  | -0.17992600 |
| H | -1.30897300 | 2.05266500  | -0.47576000 |
| C | -3.62788000 | 3.13839300  | -0.41347700 |
| C | -4.93960200 | 1.32486000  | 0.53970600  |

|   |             |             |             |
|---|-------------|-------------|-------------|
| C | -4.55252000 | 4.05509000  | 0.06841500  |
| H | -2.79764200 | 3.50134000  | -1.01124100 |
| C | -5.85620800 | 2.24995900  | 1.01850100  |
| H | -5.07857000 | 0.26779300  | 0.72568900  |
| C | -5.66458900 | 3.61262500  | 0.78604700  |
| H | -4.41566600 | 5.11167300  | -0.12527800 |
| H | -6.71922000 | 1.91105600  | 1.57802700  |
| H | -6.38277900 | 4.33108400  | 1.16245900  |
| N | 3.28129500  | -0.59386800 | 0.81554200  |
| C | 2.90343200  | 0.62558000  | 0.68364900  |
| O | 2.12757600  | -1.44388000 | 1.05476500  |
| N | 1.50869600  | 0.97772600  | 0.89472400  |
| C | 3.86970800  | 1.65349600  | 0.29725400  |
| C | 4.98819900  | 1.30001800  | -0.47834200 |
| C | 3.71338500  | 2.98284500  | 0.73060800  |
| C | 5.92747600  | 2.26441500  | -0.81417900 |
| H | 5.10405200  | 0.27912900  | -0.81841000 |
| C | 4.66064700  | 3.93913500  | 0.39059500  |
| H | 2.88862000  | 3.27240400  | 1.37422800  |
| C | 5.76581000  | 3.58177500  | -0.38296000 |
| H | 6.78498800  | 1.99219400  | -1.41693200 |
| H | 4.54681400  | 4.95845400  | 0.73790100  |
| H | 6.50194300  | 4.33103300  | -0.64822300 |
| H | -1.24854900 | 1.19393900  | -1.87546900 |
| H | 1.36963800  | 1.94883100  | 0.62389600  |
| H | -2.53362900 | -1.96969100 | -1.85764000 |
| H | 2.51304300  | -2.26340200 | 1.39370000  |
| H | 1.28770100  | 0.90635000  | 1.89150000  |

**U-M5-M5-NO3'**

|   |             |             |             |
|---|-------------|-------------|-------------|
| U | -0.00176400 | 0.04008200  | 0.05351900  |
| O | 0.71618200  | -0.18051400 | 1.63425700  |
| O | -0.71682400 | 0.39252600  | -1.50435700 |
| O | 0.00162300  | 2.40637700  | 0.52675700  |
| H | 0.36887300  | 2.70609000  | 1.37160900  |
| C | -0.50586400 | 3.60077800  | -0.22140500 |
| C | 0.56447400  | 4.65826600  | -0.34860700 |
| H | -1.37932500 | 3.95780700  | 0.32584400  |
| H | -0.82123200 | 3.19841300  | -1.18221600 |
| H | 0.15157200  | 5.51117200  | -0.89377100 |
| H | 0.89042000  | 5.02785600  | 0.62759800  |
| H | 1.43071000  | 4.29552600  | -0.90538100 |
| O | -1.32149400 | -2.03275400 | 0.37397000  |



|                      |             |             |             |   |             |             |             |
|----------------------|-------------|-------------|-------------|---|-------------|-------------|-------------|
| N                    | -2.75590000 | -2.03248500 | 0.13317400  | C | -2.61662400 | 4.40721300  | -1.43644900 |
| C                    | -3.25334200 | -0.89454800 | 0.46161800  | H | -0.45812400 | 4.65144900  | -1.37746500 |
| N                    | -2.41602200 | 0.10102400  | 1.11128700  | H | -1.17818100 | 4.20868000  | 0.18721600  |
| C                    | -4.65484800 | -0.59927400 | 0.16807500  | H | -2.81508000 | 5.46845700  | -1.26431500 |
| H                    | -2.90799400 | 0.99211500  | 1.13246200  | H | -2.67695000 | 4.23977800  | -2.51545000 |
| C                    | -5.38559200 | 0.29052300  | 0.97695600  | H | -3.40230100 | 3.83634400  | -0.93773300 |
| C                    | -5.29086600 | -1.24523500 | -0.90766500 | O | 2.11446500  | 1.96300300  | -0.37602900 |
| C                    | -6.72733700 | 0.52751600  | 0.71117900  | N | 3.24333600  | 1.12105700  | -0.73397700 |
| H                    | -4.93475800 | 0.76603500  | 1.84211200  | C | 3.26149600  | 0.07305200  | 0.00727900  |
| C                    | -6.63184700 | -1.00003400 | -1.16470000 | N | 2.30802100  | -0.05632500 | 1.09909600  |
| H                    | -4.72693600 | -1.92217700 | -1.53613400 | C | 4.22770600  | -0.99243700 | -0.25647000 |
| C                    | -7.35047600 | -0.11522800 | -0.35934000 | H | 2.32812400  | -1.01426700 | 1.44389900  |
| H                    | -7.29128300 | 1.20195600  | 1.34337700  | C | 4.68455200  | -1.82031100 | 0.78531500  |
| H                    | -7.11845000 | -1.49379200 | -1.99664800 | C | 4.73706100  | -1.16397700 | -1.55643300 |
| H                    | -8.39722100 | 0.07378200  | -0.56498700 | C | 5.63278000  | -2.80107900 | 0.52781200  |
| N                    | 2.74121500  | -1.89390900 | -0.71856700 | H | 4.34539800  | -1.68081500 | 1.80661900  |
| C                    | 3.24772700  | -0.71775000 | -0.61628200 | C | 5.68347400  | -2.14774200 | -1.80260800 |
| O                    | 1.31178300  | -1.79579200 | -0.97090800 | H | 4.37925700  | -0.53389500 | -2.36027800 |
| N                    | 2.42631600  | 0.45059200  | -0.88987500 | C | 6.13124100  | -2.96669600 | -0.76479400 |
| C                    | 4.64306200  | -0.55863100 | -0.20996700 | H | 5.99195000  | -3.42845200 | 1.33398600  |
| H                    | 2.92059500  | 1.28803500  | -0.58833700 | H | 6.07008600  | -2.28234300 | -2.80517400 |
| C                    | 5.25086700  | -1.54401500 | 0.58909900  | H | 6.86942000  | -3.73453200 | -0.96273200 |
| C                    | 5.39614200  | 0.54689800  | -0.64653900 | N | -1.72239700 | -1.85949800 | 1.42295600  |
| C                    | 6.58630700  | -1.41852600 | 0.94299100  | C | -2.61409800 | -1.22565300 | 0.74758300  |
| H                    | 4.66949200  | -2.38961100 | 0.93287700  | O | -0.68383300 | -0.93010100 | 1.86028000  |
| C                    | 6.73231400  | 0.66115000  | -0.28807600 | N | -2.55039500 | 0.21988300  | 0.64111400  |
| H                    | 4.96688900  | 1.29730000  | -1.30258200 | C | -3.67643500 | -1.96847900 | 0.07165800  |
| C                    | 7.32732500  | -0.31895400 | 0.50751400  | H | -3.23024500 | 0.54209500  | -0.04450100 |
| H                    | 7.05109700  | -2.17481000 | 1.56323200  | C | -3.44667800 | -3.29487800 | -0.33653500 |
| H                    | 7.31390900  | 1.50540000  | -0.63670900 | C | -4.93963800 | -1.38392100 | -0.13523600 |
| H                    | 8.36968500  | -0.22511300 | 0.78741500  | C | -4.46473100 | -4.01615300 | -0.94297700 |
| H                    | 2.28064900  | 0.52982200  | -1.89950400 | H | -2.47245700 | -3.74126600 | -0.18567100 |
| H                    | -2.25336300 | -0.17855400 | 2.08206100  | C | -5.95156800 | -2.11573500 | -0.74121900 |
| H                    | -1.09999100 | -2.96614100 | 0.49922200  | H | -5.15975100 | -0.37994400 | 0.21316300  |
| H                    | 1.09124600  | -2.62155500 | -1.42423400 | C | -5.71476100 | -3.42982900 | -1.14694200 |
|                      |             |             |             | H | -4.28475100 | -5.03493300 | -1.26295900 |
|                      |             |             |             | H | -6.92699500 | -1.66888200 | -0.88751100 |
|                      |             |             |             | H | -6.50613300 | -3.99705300 | -1.62201400 |
|                      |             |             |             | H | 2.59791400  | 0.55186000  | 1.86948000  |
|                      |             |             |             | H | -2.79739800 | 0.63953900  | 1.54067300  |
|                      |             |             |             | H | 2.34193500  | 2.82399200  | -0.75292400 |
|                      |             |             |             | H | -0.34963600 | -1.32504200 | 2.67717900  |
| <b>U-M5-M5-NO3''</b> |             |             |             |   |             |             |             |
| U                    | -0.02231300 | 0.91181500  | 0.32745700  |   |             |             |             |
| O                    | 0.01734700  | -0.15801000 | -1.05383800 |   |             |             |             |
| O                    | -0.11572400 | 2.01570100  | 1.68290500  |   |             |             |             |
| O                    | -0.91421000 | 2.63230700  | -1.10698200 |   |             |             |             |
| H                    | -1.02334500 | 2.42996400  | -2.04823100 |   |             |             |             |
| C                    | -1.24781900 | 4.07716700  | -0.89103300 |   |             |             |             |

**U-M7-M7-NO3**

|   |             |             |             |
|---|-------------|-------------|-------------|
| U | -0.02027400 | 0.83229200  | 0.14120600  |
| O | -0.21166300 | 0.04690300  | -1.42187100 |
| O | 0.00577700  | 1.65457700  | 1.69983000  |
| O | -1.03494500 | 2.80736900  | -0.83903900 |
| H | -1.21885800 | 2.79172800  | -1.78893200 |
| C | -1.08706400 | 4.21892500  | -0.36644300 |
| C | -2.38240700 | 4.88052900  | -0.77604600 |
| H | -0.21252300 | 4.72209500  | -0.78116100 |
| H | -0.97599900 | 4.14493600  | 0.71382300  |
| H | -2.38709700 | 5.90966400  | -0.40799100 |
| H | -2.48781300 | 4.92651700  | -1.86375200 |
| H | -3.24926700 | 4.36824500  | -0.35409100 |
| O | 2.03605600  | 1.67150200  | -0.47312700 |
| N | 3.15462400  | 0.95357000  | -0.56874700 |
| C | 3.35196700  | -0.12544100 | 0.14537300  |
| N | 2.33817400  | -0.35591500 | 1.09490400  |
| C | 4.48149700  | -1.00873400 | -0.07034300 |
| H | 2.33958200  | -1.30349500 | 1.45910700  |
| C | 5.02984600  | -1.71966400 | 1.01543900  |
| C | 5.05404100  | -1.14134600 | -1.35190100 |
| C | 6.14014200  | -2.52829400 | 0.82230400  |
| H | 4.61921900  | -1.60986000 | 2.01265300  |
| C | 6.16248200  | -1.95428900 | -1.53245500 |
| H | 4.60730500  | -0.65168100 | -2.21010900 |
| C | 6.70795700  | -2.64444300 | -0.44764500 |
| H | 6.57038800  | -3.06150100 | 1.66078300  |
| H | 6.59423700  | -2.06534100 | -2.51925600 |
| H | 7.57316800  | -3.27976000 | -0.59425300 |
| N | -1.66878700 | -1.84970000 | 0.80150200  |
| C | -2.78692100 | -1.20617600 | 0.58853300  |
| O | -0.53703200 | -1.21963000 | 1.13881900  |
| N | -2.70624000 | 0.17340000  | 0.84163400  |
| C | -3.97936000 | -1.86110700 | 0.08188100  |
| H | -3.54045200 | 0.67306600  | 0.55262600  |
| C | -3.87097100 | -2.95358200 | -0.80123200 |
| C | -5.25187400 | -1.41816600 | 0.49234500  |
| C | -5.01590400 | -3.59561500 | -1.24905900 |
| H | -2.90224100 | -3.26508400 | -1.17547700 |
| C | -6.38936200 | -2.07111500 | 0.04025700  |
| H | -5.35438200 | -0.59926300 | 1.19575700  |
| C | -6.27314400 | -3.15831500 | -0.82765000 |
| H | -4.93308300 | -4.42601200 | -1.93906600 |

|   |             |             |             |
|---|-------------|-------------|-------------|
| H | -7.36655700 | -1.74067700 | 0.36947600  |
| H | -7.16469200 | -3.66166600 | -1.18185500 |
| H | 2.37207400  | 0.31235900  | 1.86721000  |
| H | -2.48798900 | 0.37855600  | 1.81862000  |
| H | 3.86185800  | 1.31777800  | -1.20334600 |
| H | -1.62714500 | -2.86567800 | 0.77621000  |

**U-M6-M6-NO3**

|   |             |             |             |
|---|-------------|-------------|-------------|
| U | -0.00125500 | 0.91131800  | 0.15300700  |
| O | 0.77044900  | 0.74544300  | 1.73130400  |
| O | -0.76811400 | 1.13338100  | -1.42022800 |
| O | 0.04564500  | 3.31384600  | 0.47728800  |
| H | 0.42411000  | 3.66250100  | 1.29696800  |
| C | -0.43931800 | 4.45671800  | -0.34896400 |
| C | 0.66183500  | 5.46513500  | -0.57968800 |
| H | -1.29357600 | 4.88239800  | 0.17926700  |
| H | -0.78277500 | 3.99235400  | -1.27158200 |
| H | 0.27077100  | 6.28230300  | -1.19133200 |
| H | 1.01257100  | 5.90343200  | 0.35888700  |
| H | 1.50874400  | 5.02334800  | -1.10818100 |
| O | -1.79085600 | -0.23973400 | 0.78588500  |
| N | -2.95954100 | -0.58672500 | 0.18728600  |
| C | -3.88655400 | -1.25247300 | 0.86468200  |
| N | -3.63461600 | -1.60737700 | 2.11638900  |
| C | -5.15355800 | -1.58375600 | 0.20243900  |
| H | -4.36891800 | -1.98686600 | 2.69373700  |
| C | -5.75072000 | -2.83322800 | 0.43481700  |
| C | -5.76784700 | -0.65967600 | -0.65813700 |
| C | -6.94707500 | -3.15176500 | -0.19496800 |
| H | -5.26755000 | -3.56451900 | 1.07263100  |
| C | -6.96631600 | -0.98838500 | -1.27919300 |
| H | -5.34127200 | 0.32617800  | -0.80492100 |
| C | -7.55435800 | -2.23217400 | -1.05015700 |
| H | -7.40270300 | -4.11925000 | -0.02452500 |
| H | -7.44984400 | -0.27035800 | -1.92979900 |
| H | -8.48958500 | -2.48385100 | -1.53549400 |
| N | 2.93275100  | -0.57377300 | -0.19970400 |
| C | 3.85742500  | -1.10365100 | -0.99014900 |
| O | 1.77654700  | -0.09069800 | -0.72507400 |
| N | 3.61461200  | -1.19505900 | -2.28978700 |
| C | 5.11318800  | -1.58091700 | -0.39904400 |
| H | 4.35038900  | -1.46132000 | -2.92557700 |
| C | 5.73543500  | -0.85530400 | 0.62955400  |

|   |             |             |             |
|---|-------------|-------------|-------------|
| C | 5.69261000  | -2.76941000 | -0.87161100 |
| C | 6.92478100  | -1.31980500 | 1.17744900  |
| H | 5.32281700  | 0.08900800  | 0.96637000  |
| C | 6.87966600  | -3.22575500 | -0.31295700 |
| H | 5.20271500  | -3.35193500 | -1.64341500 |
| C | 7.49529400  | -2.50315800 | 0.70911900  |
| H | 7.41480300  | -0.75238700 | 1.95885800  |
| H | 7.32153000  | -4.14793200 | -0.66933300 |
| H | 8.42328900  | -2.86084600 | 1.13859500  |
| H | 2.72357600  | -0.89418700 | -2.65956200 |
| H | -2.73592100 | -1.39942300 | 2.52910800  |
| H | -3.04669900 | -0.42328400 | -0.80969300 |
| H | 3.01022200  | -0.61837700 | 0.81054100  |

### U-M9

|   |             |             |             |
|---|-------------|-------------|-------------|
| U | -1.02666000 | -0.00907000 | 0.01961000  |
| O | -1.03640700 | 0.08002100  | -1.75531400 |
| O | 0.51602300  | 1.98207500  | 0.04011900  |
| O | -1.58205500 | 2.49191600  | 0.06176100  |
| O | -0.08636100 | 4.08031200  | 0.02166100  |
| N | -0.37868100 | 2.90462900  | 0.04021400  |
| O | -1.04535300 | -0.01753200 | 1.79535300  |
| O | -2.80438300 | -1.80696600 | -0.03487100 |
| O | -3.53361700 | 0.22538500  | 0.01782400  |
| O | -4.95497900 | -1.43085600 | -0.03204700 |
| N | -3.81410400 | -1.02317400 | -0.01697200 |
| O | 0.12755800  | -2.00451100 | -0.06271700 |
| N | 1.15814700  | -1.12631900 | -0.01059900 |
| C | 2.35151200  | -1.62206700 | -0.06615100 |
| N | 2.52886000  | -3.00282300 | -0.09124700 |
| C | 3.53972500  | -0.74921600 | -0.03671600 |
| H | 3.24730100  | -3.31607300 | -0.72961800 |
| H | 1.63457800  | -3.46024200 | -0.23865200 |
| C | 4.79816400  | -1.28687300 | 0.27547900  |
| C | 3.44464400  | 0.62340600  | -0.31750400 |
| C | 5.93284600  | -0.47946100 | 0.29422500  |
| C | 4.57940900  | 1.42422200  | -0.28769000 |
| H | 2.48265600  | 1.06233200  | -0.54414700 |
| C | 5.82955900  | 0.87961300  | 0.01099000  |
| H | 4.48283100  | 2.48340700  | -0.49965100 |
| H | 6.71159100  | 1.51105400  | 0.02873100  |
| H | 4.87971700  | -2.33523800 | 0.53680100  |
| H | 6.89586700  | -0.91345700 | 0.54273500  |

### U-M10

|   |             |             |             |
|---|-------------|-------------|-------------|
| U | 1.02728600  | -0.06300100 | -0.00068300 |
| O | 1.00717200  | -0.00663100 | -1.77737300 |
| O | 2.21837600  | -2.29185400 | 0.00016300  |
| O | 3.50993300  | -0.56583000 | 0.00188200  |
| O | 4.38527200  | -2.56639500 | 0.00292000  |
| N | 3.41516600  | -1.84106700 | 0.00171000  |
| O | 1.00360800  | -0.00740300 | 1.77597300  |
| O | 0.42836700  | 2.41947800  | -0.00112400 |
| O | 2.54479500  | 2.01443500  | 0.00205600  |
| O | 1.84447500  | 4.08102200  | 0.00232000  |
| N | 1.62532300  | 2.88901300  | 0.00115200  |
| O | -0.57658300 | -1.71000400 | -0.00204300 |
| N | -1.89482300 | -1.65093800 | -0.00109900 |
| C | -2.41474000 | -0.46674100 | -0.00096200 |
| N | -1.51891300 | 0.67008100  | -0.00190500 |
| C | -3.87258600 | -0.29469500 | -0.00001300 |
| H | -1.64145500 | 1.26670200  | 0.81301000  |
| H | -1.64203200 | 1.26569600  | -0.81747700 |
| C | -4.45992500 | 0.98110300  | -0.00043200 |
| C | -4.73001400 | -1.41402500 | 0.00130300  |
| C | -5.84558700 | 1.13529600  | 0.00038800  |
| C | -6.10677000 | -1.25432100 | 0.00211800  |
| H | -4.28365500 | -2.39986500 | 0.00165700  |
| C | -6.67846500 | 0.02190200  | 0.00166500  |
| H | -6.74472500 | -2.13232300 | 0.00314200  |
| H | -7.75645500 | 0.14128700  | 0.00229600  |
| H | -3.83352600 | 1.86560400  | -0.00140400 |
| H | -6.27050000 | 2.13373100  | 0.00002400  |

### U-M8

|   |             |             |             |
|---|-------------|-------------|-------------|
| U | 1.28401300  | -0.03807000 | 0.12089100  |
| O | 1.99409200  | 0.30390200  | 1.71389800  |
| O | 0.45395900  | 2.34096700  | -0.00062900 |
| O | 2.43891300  | 2.03625200  | -0.79900300 |
| O | 1.55959300  | 4.03308500  | -0.82562700 |
| N | 1.49295000  | 2.85542800  | -0.55565900 |
| O | 0.65034300  | -0.35908500 | -1.50601700 |
| O | 2.09562800  | -2.40412300 | 0.28994800  |
| O | 3.50855500  | -1.02560700 | -0.59568700 |
| O | 4.05231100  | -3.12493200 | -0.35410300 |
| O | -0.68345800 | -0.36407400 | 0.98134600  |
| N | 3.25575400  | -2.22325300 | -0.22659200 |

|   |             |             |             |
|---|-------------|-------------|-------------|
| N | -1.93520300 | -0.78097800 | 0.61648900  |
| C | -2.79212500 | 0.18220800  | 0.50247700  |
| N | -2.52664600 | 1.51606900  | 0.78291400  |
| C | -4.17557800 | -0.18275200 | 0.11846500  |
| H | -1.53936800 | 1.70380900  | 0.90779600  |
| H | -2.95192300 | 2.16906300  | 0.13941500  |
| C | -5.24962100 | 0.67403900  | 0.39645000  |
| C | -4.43819600 | -1.39963200 | -0.53008600 |
| C | -6.54940000 | 0.32755300  | 0.03158400  |
| C | -5.73543600 | -1.74369700 | -0.88674700 |
| H | -3.60573200 | -2.05791300 | -0.74170500 |
| C | -6.79903700 | -0.88103700 | -0.61191000 |
| H | -5.91959000 | -2.68747000 | -1.38942900 |
| H | -7.81032000 | -1.15078500 | -0.89750500 |
| H | -5.06527900 | 1.60134200  | 0.92569400  |
| H | -7.36811600 | 1.00239400  | 0.25928700  |

**U-M8-M1-cis**

|   |             |             |             |
|---|-------------|-------------|-------------|
| U | -1.48136800 | -0.69392100 | -0.04927000 |
| O | -1.04227200 | -1.81491900 | -1.35140000 |
| O | -2.54609500 | 0.85688800  | -1.76373500 |
| O | -3.89730600 | -0.58017600 | -0.91169800 |
| O | -4.64987100 | 0.87445800  | -2.35628400 |
| N | -3.74553800 | 0.40025700  | -1.70424700 |
| O | -1.95307900 | 0.37381600  | 1.28723300  |
| O | -1.18508800 | -2.53009600 | 1.70422000  |
| O | -3.15611400 | -2.47766400 | 0.85290100  |
| O | -2.69659000 | -3.94100200 | 2.40543300  |
| O | 0.02821900  | 0.78547700  | -0.66927500 |
| N | -2.37335400 | -3.02512400 | 1.68270400  |
| O | 1.00423000  | -1.20495200 | 1.36072000  |
| N | 2.09741400  | -1.93407500 | 0.79024600  |
| C | 3.02136100  | -1.12968900 | 0.37887300  |
| N | 3.01919600  | 0.22767900  | 0.48488100  |
| C | 4.21495900  | -1.79348500 | -0.22131300 |
| H | 3.75395700  | 0.72494300  | 0.01193500  |
| H | 2.13415200  | 0.73541000  | 0.54365900  |
| C | 4.93230200  | -1.18920000 | -1.26022100 |
| C | 4.63154000  | -3.04867000 | 0.24110400  |
| C | 6.04427800  | -1.81761500 | -1.81689200 |
| C | 5.74051200  | -3.67487000 | -0.31559400 |
| H | 4.06538700  | -3.51861800 | 1.03454600  |
| C | 6.45534900  | -3.06074200 | -1.34438700 |

|   |             |             |             |
|---|-------------|-------------|-------------|
| H | 6.05048100  | -4.64578300 | 0.05599600  |
| H | 7.32140800  | -3.55035500 | -1.77666500 |
| H | 0.55623400  | -1.89375000 | 1.87212200  |
| N | 0.63200800  | 1.83534100  | -0.02911400 |
| C | 0.22289300  | 3.00445500  | -0.40759100 |
| N | -0.69563400 | 3.21951300  | -1.41677200 |
| C | 0.84959500  | 4.18579800  | 0.23057600  |
| H | -1.18617400 | 2.38123500  | -1.71241600 |
| H | -1.31962000 | 3.99813800  | -1.26054800 |
| C | 0.89934800  | 5.41840100  | -0.43553300 |
| C | 1.40441000  | 4.09411600  | 1.51647600  |
| C | 1.48849500  | 6.52851200  | 0.16606300  |
| C | 1.99694900  | 5.20182100  | 2.11015000  |
| H | 1.35413500  | 3.14576000  | 2.03575600  |
| C | 2.04015000  | 6.42600200  | 1.44033400  |
| H | 2.41791500  | 5.11367500  | 3.10615100  |
| H | 2.49699300  | 7.29064100  | 1.90994100  |
| H | 6.58123000  | -1.33798200 | -2.62822000 |
| H | 4.60220800  | -0.23890000 | -1.66504000 |
| H | 0.49604500  | 5.49454200  | -1.43836300 |
| H | 1.52176400  | 7.47298300  | -0.36708600 |

**U-M8-M1**

|   |             |             |             |
|---|-------------|-------------|-------------|
| U | 0.53354900  | -0.19202200 | -0.09246900 |
| O | -0.25149500 | 0.13823300  | -1.65045200 |
| O | 1.20426200  | 2.25818400  | 0.05903600  |
| O | -0.73492600 | 1.81099500  | 0.88883300  |
| O | -0.00013900 | 3.86690600  | 0.91168700  |
| N | 0.15066100  | 2.70129300  | 0.63211800  |
| O | 1.22378800  | -0.49876400 | 1.51220100  |
| O | 0.06106400  | -2.64861800 | -0.42765100 |
| O | -1.50899800 | -1.55807300 | 0.57992100  |
| O | -1.78918400 | -3.67191500 | 0.11735900  |
| O | 2.48998400  | -0.32322400 | -0.99730500 |
| N | -1.10568200 | -2.67269300 | 0.09047700  |
| O | -3.20040100 | 0.84293500  | 1.68329800  |
| N | -4.40038400 | 1.13605700  | 1.00693900  |
| C | -5.02589300 | 0.04144100  | 0.72981900  |
| N | -4.58005200 | -1.21966100 | 1.07928500  |
| C | -6.33872100 | 0.16395500  | 0.04920500  |
| H | -4.81615700 | -1.94342800 | 0.41494100  |
| H | -3.59061700 | -1.23500000 | 1.31138700  |
| C | -7.28135100 | -0.87004200 | 0.11561200  |
| C | -6.66091700 | 1.32192100  | -0.67394500 |

|   |             |             |             |
|---|-------------|-------------|-------------|
| C | -8.51059200 | -0.75404200 | -0.53129100 |
| C | -7.88808300 | 1.43592300  | -1.31418500 |
| H | -5.93108500 | 2.11965300  | -0.71965300 |
| C | -8.81917300 | 0.39721000  | -1.24960700 |
| H | -8.11859700 | 2.33642400  | -1.87367800 |
| H | -9.77477700 | 0.48705300  | -1.75511500 |
| H | -2.63431700 | 1.61155600  | 1.52812100  |
| N | 3.78143600  | -0.65848600 | -0.68542000 |
| C | 4.57725400  | 0.35986700  | -0.61553300 |
| N | 4.21272000  | 1.66884800  | -0.89309800 |
| C | 5.99666000  | 0.08930100  | -0.28733500 |
| H | 3.21140000  | 1.79371400  | -0.97520500 |
| H | 4.63252000  | 2.35888400  | -0.28624600 |
| C | 7.00123100  | 1.00513700  | -0.62860200 |
| C | 6.36212100  | -1.09526000 | 0.37047300  |
| C | 8.33469800  | 0.74701300  | -0.31626500 |
| C | 7.69274400  | -1.35116500 | 0.67493000  |
| H | 5.58311800  | -1.79953200 | 0.63179200  |
| C | 8.68689800  | -0.43040700 | 0.33713800  |
| H | 7.95724200  | -2.27099300 | 1.18585800  |
| H | 9.72451600  | -0.63121400 | 0.58183900  |
| H | -9.22910800 | -1.56434800 | -0.46621500 |
| H | -7.06008200 | -1.75694200 | 0.69752700  |
| H | 6.73666400  | 1.90846400  | -1.16540200 |
| H | 9.09896200  | 1.46584700  | -0.59283500 |

### U-M8-M2-cis

|   |             |             |             |
|---|-------------|-------------|-------------|
| U | 1.26126300  | -0.75008000 | -0.02446300 |
| O | 1.82122800  | 0.04595100  | -1.51191800 |
| O | -0.46199300 | 0.74517900  | 2.63201600  |
| O | 0.73943400  | -1.49884500 | 1.52025000  |
| O | 2.78020000  | 0.89199300  | 1.23824000  |
| O | 3.74474200  | -0.94626000 | 0.67081500  |
| O | 4.91034800  | 0.62290300  | 1.64168500  |
| N | 3.86184300  | 0.20142400  | 1.20012800  |
| O | 0.45996600  | -2.77116700 | -1.33955400 |
| N | 1.53870000  | -3.45019800 | -1.26610700 |
| H | -0.18881100 | -0.18422100 | 2.54574400  |
| N | 0.02552800  | 1.30966700  | 1.43738100  |
| C | -0.46183500 | 2.48971900  | 1.25712000  |
| N | -1.43027000 | 3.03057700  | 2.07927900  |
| H | -1.60027100 | 2.48896900  | 2.91454300  |
| H | -1.38822700 | 4.02910100  | 2.20966000  |
| C | -0.03295500 | 3.29627700  | 0.09082000  |

|   |             |             |             |
|---|-------------|-------------|-------------|
| C | -0.98280000 | 4.04263500  | -0.62103300 |
| C | 1.31011100  | 3.33823500  | -0.30116500 |
| C | -0.59347900 | 4.81864300  | -1.70815700 |
| H | -2.02636800 | 3.97872600  | -0.33772600 |
| C | 1.69063700  | 4.11434600  | -1.39247900 |
| H | 2.04511500  | 2.76542700  | 0.25070500  |
| C | 0.74516800  | 4.85784500  | -2.09573300 |
| H | 2.73197500  | 4.13281700  | -1.69349200 |
| O | 2.48630100  | -2.87942200 | -0.62544300 |
| O | 1.65769000  | -4.54875800 | -1.76479500 |
| H | -1.33785200 | 5.38114300  | -2.26181700 |
| H | 1.04799700  | 5.45923800  | -2.94645000 |
| N | -1.99091000 | -0.79388800 | -0.10304400 |
| O | -0.82018300 | -0.39249000 | -0.68684600 |
| C | -3.02572300 | -0.25688200 | -0.66677800 |
| N | -2.92993600 | 0.70539900  | -1.67279600 |
| H | -3.58367700 | 0.57040600  | -2.43293700 |
| C | -4.36591800 | -0.63364300 | -0.17431100 |
| C | -4.54617900 | -1.80760600 | 0.57573100  |
| C | -5.48629400 | 0.16389000  | -0.44888000 |
| C | -5.80721400 | -2.16670600 | 1.03191700  |
| H | -3.67857400 | -2.42014400 | 0.78423600  |
| C | -6.75148800 | -0.20421800 | 0.00548300  |
| H | -5.35682100 | 1.08947000  | -0.99735300 |
| C | -6.91930500 | -1.37039000 | 0.74642000  |
| H | -5.92766400 | -3.07812600 | 1.60827600  |
| H | -7.60555700 | 0.42837100  | -0.21430300 |
| H | -7.90393900 | -1.65826900 | 1.09955800  |
| H | -1.96641300 | 0.75806300  | -1.99123500 |

### U-M8-M2

|   |             |             |             |
|---|-------------|-------------|-------------|
| U | -0.20078600 | -0.08061200 | -0.09765400 |
| O | -0.94952600 | 0.33226100  | -1.65750600 |
| O | -2.03754500 | -0.52326300 | 2.85215000  |
| O | 0.39294500  | -0.45991600 | 1.55930100  |
| O | -1.23954500 | 2.16664900  | 0.79057700  |
| O | 0.74750400  | 2.33221300  | -0.00700800 |
| O | -0.29419100 | 4.13185900  | 0.66148100  |
| N | -0.26439100 | 2.93065500  | 0.48854400  |
| O | -1.63664900 | -2.19225400 | -0.07829500 |
| N | -0.80019900 | -2.95804200 | -0.67285700 |
| H | -1.07275500 | -0.54510300 | 2.72583800  |
| N | -2.49469100 | -0.19307700 | 1.56008900  |
| C | -3.78096200 | -0.25824200 | 1.50214400  |

|   |             |             |             |   |             |             |             |
|---|-------------|-------------|-------------|---|-------------|-------------|-------------|
| N | -4.54967700 | -0.71774100 | 2.55470300  | O | -2.36647400 | -2.97299600 | -0.88161100 |
| H | -4.03053400 | -0.82184900 | 3.41493000  | O | -4.28543900 | -2.34890200 | -1.71331500 |
| H | -5.45667600 | -0.28768300 | 2.64937300  | O | 1.10122400  | -0.06096300 | 0.88226400  |
| C | -4.49084400 | 0.10922000  | 0.25532600  | N | -3.16771900 | -2.08637300 | -1.30997600 |
| C | -5.59964900 | -0.64302600 | -0.15695900 | O | -0.61147500 | 0.71018000  | -1.16112200 |
| C | -4.08689500 | 1.21150500  | -0.50665500 | N | -1.57402400 | 1.52075600  | -0.74146900 |
| C | -6.28781600 | -0.30281900 | -1.31697200 | C | -1.29433300 | 2.63484100  | -0.10663700 |
| H | -5.89639800 | -1.51086900 | 0.42009400  | N | -0.01381000 | 2.94274200  | 0.14056000  |
| C | -4.77826500 | 1.54351400  | -1.66813100 | C | -2.40071600 | 3.52089200  | 0.30813300  |
| H | -3.24112600 | 1.80334000  | -0.18065200 | H | 0.18642700  | 3.80289500  | 0.61912900  |
| C | -5.87831100 | 0.79216300  | -2.07614300 | H | 0.73037300  | 2.21537100  | 0.08414300  |
| H | -4.45023200 | 2.39303000  | -2.25635100 | C | -2.36372000 | 4.15439900  | 1.55811600  |
| O | 0.31122500  | -2.40732700 | -0.96554200 | C | -3.50158300 | 3.73694700  | -0.53210200 |
| O | -1.04965100 | -4.11591000 | -0.93140100 | C | -3.40753000 | 4.98124400  | 1.95870400  |
| H | -7.13414500 | -0.90165000 | -1.63618300 | C | -4.54656400 | 4.55960500  | -0.12346500 |
| H | -6.41018400 | 1.05403100  | -2.98468800 | H | -3.52663800 | 3.27450400  | -1.51170800 |
| N | 3.07673300  | -0.49622600 | -0.55426900 | C | -4.50218200 | 5.18624300  | 1.12023300  |
| O | 1.82043800  | -0.06477000 | -0.85830500 | H | -5.39244000 | 4.71790400  | -0.78282700 |
| C | 3.94721900  | 0.46112300  | -0.49323600 | H | -5.31641100 | 5.82910500  | 1.43547400  |
| N | 3.67228500  | 1.79382200  | -0.76829500 | N | 1.95112400  | 0.85943600  | 0.35477900  |
| H | 4.15167100  | 2.44605600  | -0.16301000 | C | 3.20300200  | 0.52900800  | 0.42430500  |
| C | 5.34538700  | 0.08685500  | -0.18104500 | N | 3.64472900  | -0.62628600 | 1.05038600  |
| C | 5.63580600  | -1.14174500 | 0.43387300  | C | 4.20568300  | 1.47272300  | -0.11136300 |
| C | 6.40827500  | 0.94634900  | -0.49294800 | H | 2.87721500  | -1.24832400 | 1.29376800  |
| C | 6.94692200  | -1.49184900 | 0.72766800  | H | 4.39376100  | -1.10447900 | 0.56891000  |
| H | 4.81252800  | -1.80402600 | 0.66804000  | C | 5.51841300  | 1.48194900  | 0.38280500  |
| C | 7.72257100  | 0.59339700  | -0.19124500 | C | 3.86867500  | 2.37463300  | -1.13411100 |
| H | 6.20328500  | 1.88142900  | -1.00061300 | C | 6.46369900  | 2.37135200  | -0.12347200 |
| C | 7.99906700  | -0.62522900 | 0.42138200  | C | 4.81254900  | 3.26506800  | -1.63074500 |
| H | 7.15174900  | -2.44488700 | 1.20439300  | H | 2.86304900  | 2.35042900  | -1.53489100 |
| H | 8.53128500  | 1.27123300  | -0.44489000 | C | 6.11640000  | 3.26851200  | -1.13040300 |
| H | 9.02166500  | -0.90042800 | 0.65748300  | H | 4.53527800  | 3.95114000  | -2.42450200 |
| H | 2.67665600  | 1.98434900  | -0.81095700 | H | 6.85323600  | 3.95901400  | -1.52706000 |

#### U-M8-M6-cis

|   |             |             |             |
|---|-------------|-------------|-------------|
| U | -0.42447000 | -1.44272900 | -0.06533200 |
| O | -1.45050900 | -1.08714000 | 1.34626400  |
| O | 1.31347200  | -2.75004400 | 1.31251700  |
| O | -0.30826100 | -3.95737200 | 0.58099700  |
| O | 1.33102000  | -4.90646500 | 1.66719600  |
| N | 0.79725500  | -3.91791000 | 1.20389600  |
| O | 0.55768300  | -1.83998300 | -1.49279100 |
| O | -2.71492000 | -0.89200500 | -1.29599900 |

#### U-M8-M6

|   |             |             |             |
|---|-------------|-------------|-------------|
| U | -0.08792100 | 0.70655700  | 0.16310800  |
| O | 0.96079000  | 0.22145200  | -1.20258300 |
| O | -0.18150900 | -1.70544700 | 0.77882000  |
| O | 1.70145400  | -2.82592200 | 0.68730900  |

|   |             |             |             |
|---|-------------|-------------|-------------|
| O | -0.16771700 | -3.77254800 | 0.13623000  |
| N | 0.45507100  | -2.79019100 | 0.51661200  |
| O | -1.02548700 | 1.20379400  | 1.58989000  |
| O | -0.41583700 | 2.97294500  | -0.99360600 |
| O | 1.31140200  | 2.88403400  | 0.29228300  |
| O | 0.94659700  | 4.67641800  | -0.90296200 |
| O | -1.91291000 | 0.18316100  | -0.89035100 |
| N | 0.62186300  | 3.55994400  | -0.55426800 |
| O | 1.84208700  | 0.44319800  | 1.54995200  |
| N | 2.82472000  | -0.33011100 | 1.08232300  |
| C | 3.88705200  | 0.19189300  | 0.53463400  |
| N | 4.02151900  | 1.54224700  | 0.52453000  |
| C | 4.94784800  | -0.67671700 | -0.01099500 |
| H | 4.58157200  | 1.92257800  | -0.22211800 |
| H | 3.16667600  | 2.06119500  | 0.72509900  |
| C | 6.28311300  | -0.25056600 | 0.02807100  |
| C | 4.64023000  | -1.91925300 | -0.58503300 |
| C | 7.29319300  | -1.05161600 | -0.49450500 |
| C | 5.65770500  | -2.71663300 | -1.09809400 |
| H | 3.61265600  | -2.25926400 | -0.63600600 |
| C | 6.98336900  | -2.28720900 | -1.05892600 |
| H | 5.40790100  | -3.67414600 | -1.54045500 |
| H | 7.77036900  | -2.91204600 | -1.46668800 |
| N | -3.26944000 | 0.28697700  | -0.74897700 |
| C | -3.84356400 | -0.83728000 | -0.45763000 |
| N | -3.19416000 | -2.05652600 | -0.36239400 |
| C | -5.31673900 | -0.81839000 | -0.29872600 |
| H | -2.18373200 | -1.98348500 | -0.31799000 |
| H | -3.55435100 | -2.67515200 | 0.34998000  |
| C | -6.07186200 | -1.99293300 | -0.42443000 |
| C | -5.98874500 | 0.38246600  | -0.01996600 |
| C | -7.45683800 | -1.97039600 | -0.26804900 |
| C | -7.36916400 | 0.40175800  | 0.12962700  |
| H | -5.40196400 | 1.28698100  | 0.07353100  |
| C | -8.11262400 | -0.77498100 | 0.01107500  |
| H | -7.87028600 | 1.33930200  | 0.34768200  |
| H | -9.19044100 | -0.75693000 | 0.13462600  |
| H | 8.32263500  | -0.71323800 | -0.45342800 |
| H | 6.52787100  | 0.69850700  | 0.49064000  |
| H | -5.57205600 | -2.92129200 | -0.67424600 |
| H | -8.02300500 | -2.89029700 | -0.37348500 |
| H | 2.60904000  | -1.34189800 | 1.06994300  |

### U-M8-EtOH-cis

|   |             |             |             |
|---|-------------|-------------|-------------|
| U | 1.22274800  | -0.11527400 | -0.05925400 |
| O | 1.92795000  | 0.00224300  | -1.69028200 |
| O | 0.33674900  | -2.44555000 | -0.59556500 |
| O | 2.29953400  | -2.44196700 | 0.27938100  |
| O | 1.34342300  | -4.34521500 | -0.20243900 |
| N | 1.33489500  | -3.13268400 | -0.17064500 |
| O | 0.59934200  | -0.21014600 | 1.60076600  |
| O | 2.82675100  | 1.76994400  | 0.70071400  |
| O | 3.67187000  | -0.19945200 | 0.85815100  |
| O | 4.88858100  | 1.53585500  | 1.37800200  |
| O | -0.81669200 | 0.08659400  | -0.85426000 |
| N | 3.84631700  | 1.04567600  | 0.99605400  |
| O | 0.59871200  | 2.44177300  | -0.26967400 |
| H | 1.43831600  | 2.89448900  | -0.11342800 |
| N | -2.05408000 | 0.45645800  | -0.40330500 |
| C | -2.90305200 | -0.52025300 | -0.34943100 |
| N | -2.63763000 | -1.81640700 | -0.76339000 |
| C | -4.27597700 | -0.20292300 | 0.10663900  |
| H | -1.65086500 | -1.99031700 | -0.92676200 |
| H | -3.05674400 | -2.53149200 | -0.18531200 |
| C | -5.35632300 | -1.02979000 | -0.23284200 |
| C | -4.52540700 | 0.93543400  | 0.88967100  |
| C | -6.64703200 | -0.72997400 | 0.19918500  |
| C | -5.81383300 | 1.23413600  | 1.31325900  |
| H | -3.68858000 | 1.56866800  | 1.15418500  |
| C | -6.88321900 | 0.40193100  | 0.97400300  |
| H | -5.98626700 | 2.11670400  | 1.92070900  |
| H | -7.88732500 | 0.63468300  | 1.31262200  |
| H | -5.18314200 | -1.89541000 | -0.86118300 |
| H | -7.46978300 | -1.38100300 | -0.07834200 |
| C | -0.10633200 | 3.04218200  | -1.36678000 |
| C | -0.44374400 | 4.49744100  | -1.07472500 |
| H | -1.00664700 | 2.44340600  | -1.48247500 |
| H | 0.49055800  | 2.95038300  | -2.28205100 |
| H | -1.02068300 | 4.92591900  | -1.90058100 |
| H | -1.03852800 | 4.57275100  | -0.16139100 |
| H | 0.46009800  | 5.10335200  | -0.94788400 |

### U-M8-EtOH

|   |             |             |             |
|---|-------------|-------------|-------------|
| U | -0.97450000 | -0.04585300 | -0.08445700 |
| O | -1.71240400 | 0.17923100  | -1.69207700 |
| O | -2.46003400 | -2.08796900 | 0.31887000  |

|   |             |             |             |
|---|-------------|-------------|-------------|
| O | -0.57146600 | -2.50561400 | -0.62300200 |
| O | -1.96482800 | -4.14206300 | -0.23379000 |
| N | -1.67235600 | -2.96579100 | -0.18421000 |
| O | -0.36854900 | -0.22112600 | 1.57528800  |
| O | -1.91174800 | 2.32248200  | 0.66446300  |
| O | -0.00038000 | 2.38866100  | -0.30678200 |
| O | -0.95433300 | 4.25202400  | 0.31300600  |
| O | 1.04472900  | -0.17406900 | -0.86702100 |
| N | -0.95117100 | 3.04132700  | 0.22432900  |
| O | -3.53158700 | 0.34802800  | 0.75111100  |
| H | -3.52365300 | 1.31326200  | 0.81074500  |
| N | 2.27665500  | -0.58948600 | -0.45284500 |
| C | 3.16895300  | 0.34843500  | -0.47008000 |
| N | 2.94124300  | 1.64287500  | -0.92255100 |
| C | 4.54195600  | -0.01164900 | -0.04944500 |
| H | 1.95272500  | 1.83679400  | -1.04063600 |
| H | 3.39526200  | 2.35616700  | -0.36828200 |
| C | 5.63822800  | 0.78397300  | -0.41146400 |
| C | 4.77511100  | -1.16163700 | 0.72212700  |
| C | 6.92897600  | 0.44571400  | -0.00822800 |
| C | 6.06308600  | -1.49793500 | 1.11695000  |
| H | 3.92658000  | -1.77484900 | 0.99647500  |
| C | 7.14861200  | -0.69467100 | 0.75859900  |
| H | 6.22317900  | -2.38941000 | 1.71461200  |
| H | 8.15269100  | -0.95797300 | 1.07437900  |
| H | 5.47796500  | 1.65485400  | -1.03596500 |
| H | 7.76425000  | 1.07293700  | -0.30291600 |
| C | -4.67793000 | -0.07803800 | 0.00029100  |
| C | -5.97209500 | 0.22799300  | 0.74204100  |
| H | -4.54594100 | -1.14986500 | -0.13374400 |
| H | -4.66707400 | 0.39334500  | -0.98932400 |
| H | -6.83215300 | -0.14977000 | 0.17957900  |
| H | -5.96643300 | -0.24510500 | 1.72685100  |
| H | -6.10859100 | 1.30579300  | 0.87996400  |

**U-M8-M8-cis**

|   |             |             |             |
|---|-------------|-------------|-------------|
| U | 0.31297300  | -1.30099800 | 0.05499900  |
| O | -0.75332700 | -1.40449600 | 1.48451200  |
| N | 2.31720100  | 1.35632300  | 0.59052800  |
| O | -1.53709200 | -2.54770900 | -1.31753300 |
| C | 1.90723700  | 2.52957800  | 0.21546200  |
| O | 1.32720100  | 0.50517300  | 0.93120700  |
| O | -0.21870400 | -3.89692300 | -0.27818200 |

|   |             |             |             |
|---|-------------|-------------|-------------|
| N | -1.23739800 | -3.75270000 | -1.01010400 |
| O | -1.90643900 | -4.69872400 | -1.40703800 |
| O | 1.31396200  | -1.24466600 | -1.41625900 |
| N | -1.99266900 | 1.11007800  | -0.32191400 |
| O | 1.94294200  | -2.57089700 | 1.31158000  |
| C | -3.23761300 | 0.80257000  | -0.52094100 |
| O | -1.10553100 | 0.25585300  | -0.87706100 |
| O | 3.24589700  | -3.57470800 | -0.13762600 |
| N | 2.99564200  | -3.28670300 | 1.03431700  |
| O | 3.69720200  | -3.65484500 | 1.98366900  |
| N | -3.65129800 | -0.29278500 | -1.29082400 |
| H | -2.84925500 | -0.87711800 | -1.52075600 |
| H | -4.35125700 | -0.85405800 | -0.81909700 |
| C | -4.26742200 | 1.70452600  | 0.02249500  |
| C | -5.60408800 | 1.61366500  | -0.40215400 |
| C | -3.94681500 | 2.68110300  | 0.98548500  |
| C | -6.58293900 | 2.45907700  | 0.11857400  |
| C | -4.92354200 | 3.52404600  | 1.49539800  |
| H | -2.91819600 | 2.75284700  | 1.31478500  |
| C | -6.25278400 | 3.41929700  | 1.07072700  |
| H | -4.65018700 | 4.26665300  | 2.23919700  |
| H | -7.01477800 | 4.07606400  | 1.47927700  |
| N | 0.56835800  | 2.93415700  | 0.21153100  |
| H | 0.29925900  | 3.39327900  | -0.65070000 |
| H | -0.05395400 | 2.14408400  | 0.36778900  |
| C | 2.93566000  | 3.52330200  | -0.14278300 |
| C | 2.61731800  | 4.88713700  | -0.25813500 |
| C | 4.26818000  | 3.13522200  | -0.38124400 |
| C | 3.58900800  | 5.82535800  | -0.60465400 |
| C | 5.23260100  | 4.07352000  | -0.71887700 |
| H | 4.51083900  | 2.08406800  | -0.29214400 |
| C | 4.90249700  | 5.42828700  | -0.83851700 |
| H | 6.25278400  | 3.74748500  | -0.89973400 |
| H | 5.65929500  | 6.15769600  | -1.11114700 |
| H | -7.60830700 | 2.36773900  | -0.22897100 |
| H | -5.86060400 | 0.88904400  | -1.16573100 |
| H | 1.60410700  | 5.20703600  | -0.04589900 |
| H | 3.31518600  | 6.87381100  | -0.68472000 |

**U-M8-M8**

|   |             |            |             |
|---|-------------|------------|-------------|
| U | -0.03684500 | 0.40232100 | -0.05470100 |
| O | -0.77630000 | 0.21260200 | -1.67000600 |
| N | 3.27119900  | 0.68127200 | -0.64099200 |



|   |             |             |             |
|---|-------------|-------------|-------------|
| O | -1.55094600 | 2.51837700  | 0.39534700  |
| C | 3.98005300  | -0.40564100 | -0.70704200 |
| O | 1.98639900  | 0.51906900  | -1.03379200 |
| O | 0.31762700  | 2.96993300  | -0.57806300 |
| N | -0.77126500 | 3.40027200  | -0.09818200 |
| O | -1.06883400 | 4.58890600  | -0.10491900 |
| O | 0.68967200  | 0.65073300  | 1.55548600  |
| N | -3.11964300 | -0.85092600 | 0.39106300  |
| O | 0.66050500  | -1.96575900 | -0.09056900 |
| C | -4.16250200 | -0.10163200 | 0.58023100  |
| O | -1.97095400 | -0.33272600 | 0.86803900  |
| O | 0.48498200  | -2.80933800 | 1.92171500  |
| N | 1.02390400  | -2.81985700 | 0.81830300  |
| O | 1.91089600  | -3.63959800 | 0.51202300  |
| N | -4.13148900 | 1.12058200  | 1.27179400  |
| H | -3.15986100 | 1.36980200  | 1.44208700  |
| H | -4.56378700 | 1.86847600  | 0.74007500  |
| C | -5.46374400 | -0.60362700 | 0.10899600  |
| C | -6.66485400 | -0.00750600 | 0.52989400  |
| C | -5.54411200 | -1.69145000 | -0.78197800 |
| C | -7.89705000 | -0.47498300 | 0.07465700  |
| C | -6.77296100 | -2.15628400 | -1.22696000 |
| H | -4.61738200 | -2.14830100 | -1.10488600 |
| C | -7.96261400 | -1.55046500 | -0.80673300 |
| H | -6.80774000 | -2.99555600 | -1.91558200 |
| H | -8.92158900 | -1.91317600 | -1.16431800 |
| N | 3.50358800  | -1.62251700 | -1.20282100 |
| H | 3.64156800  | -2.40129200 | -0.56515800 |
| H | 2.49959100  | -1.54799400 | -1.35172100 |
| C | 5.40036000  | -0.31232300 | -0.32015800 |
| C | 6.29944400  | -1.34734200 | -0.62616000 |
| C | 5.89689100  | 0.81229500  | 0.36593500  |
| C | 7.64172600  | -1.26395500 | -0.25889000 |
| C | 7.23514900  | 0.89361400  | 0.72330000  |
| H | 5.20064100  | 1.60660700  | 0.60288300  |
| C | 8.12114000  | -0.14535600 | 0.41749400  |
| H | 7.59346900  | 1.77096300  | 1.25436500  |
| H | 9.16579700  | -0.08157300 | 0.70733500  |
| H | -8.81040700 | 0.00309400  | 0.41800600  |
| H | -6.62014700 | 0.81057300  | 1.23887200  |
| H | 5.93383300  | -2.20752700 | -1.17369200 |
| H | 8.31580700  | -2.07906400 | -0.50756000 |

### U-M9-M9-T2

|   |             |             |             |
|---|-------------|-------------|-------------|
| U | 0.08239700  | -0.90882400 | 0.08512700  |
| O | -0.00169500 | -0.93865400 | 1.87089800  |
| O | -0.08602500 | -1.06159700 | -1.68582400 |
| O | -1.83823300 | -2.56282800 | 0.20445200  |
| H | -2.16206600 | -2.82371700 | 1.07385600  |
| C | -2.60951300 | -3.21039000 | -0.84300200 |
| C | -4.07957200 | -2.84238600 | -0.76572200 |
| H | -2.45664400 | -4.29095300 | -0.76581200 |
| H | -2.15338100 | -2.86161800 | -1.76813300 |
| H | -4.62398700 | -3.31597200 | -1.58736600 |
| H | -4.52897600 | -3.18775100 | 0.17100700  |
| H | -4.21481400 | -1.76162600 | -0.83864900 |
| O | 1.98435000  | -2.17616800 | 0.10926400  |
| N | 2.47560100  | -0.89873700 | 0.03548900  |
| C | 3.76121300  | -0.75616000 | 0.03613800  |
| N | 4.58472200  | -1.85895000 | 0.01935400  |
| C | 4.35164200  | 0.59657000  | -0.01006900 |
| H | 5.46088900  | -1.76967700 | 0.51069200  |
| H | 4.07793200  | -2.71867500 | 0.19066500  |
| C | 5.66167100  | 0.77855400  | -0.47475600 |
| C | 3.61577400  | 1.71617400  | 0.40663200  |
| C | 6.22911600  | 2.04930500  | -0.51175000 |
| H | 6.22618000  | -0.07196200 | -0.83832100 |
| C | 4.18674100  | 2.98198000  | 0.36174400  |
| H | 2.60060800  | 1.58954300  | 0.76034900  |
| C | 5.49492300  | 3.15493800  | -0.09173000 |
| H | 7.24164900  | 2.17466300  | -0.87872200 |
| H | 3.60870200  | 3.83922000  | 0.68826500  |
| H | 5.93617700  | 4.14493900  | -0.12019200 |
| N | -1.20394000 | 1.15949100  | 0.08381500  |
| C | -1.97323800 | 2.18562600  | -0.08732300 |
| O | 0.14409700  | 1.37955700  | 0.00239900  |
| N | -1.45141700 | 3.41171700  | -0.43293300 |
| C | -3.43693000 | 2.03096000  | 0.02667700  |
| H | -1.91899600 | 4.22230100  | -0.05630700 |
| H | -0.44035100 | 3.42776700  | -0.37825300 |
| C | -4.29754600 | 2.83507000  | -0.73325800 |
| C | -3.98801300 | 1.08813300  | 0.90617900  |
| C | -5.67789400 | 2.69266600  | -0.62145800 |
| H | -3.87920800 | 3.55212200  | -1.42965900 |
| C | -5.36726500 | 0.94679200  | 1.01107400  |
| H | -3.32284200 | 0.48937200  | 1.51586400  |
| C | -6.21759800 | 1.74849000  | 0.24893000  |

|   |             |            |             |
|---|-------------|------------|-------------|
| H | -6.33214300 | 3.31575500 | -1.22082400 |
| H | -5.78233500 | 0.22160000 | 1.70234200  |
| H | -7.29271900 | 1.64138300 | 0.33810900  |

**U-M9-M9-T3**

|   |             |             |             |
|---|-------------|-------------|-------------|
| U | -0.01670400 | -0.93526600 | -0.10681700 |
| O | -0.03301700 | -1.00977300 | 1.67721300  |
| O | -0.00451000 | -0.58087200 | -1.85727500 |
| O | -0.07324100 | 1.54223400  | 0.38599900  |
| H | -0.20244800 | 1.71806300  | 1.32515000  |
| C | -0.27632000 | 2.74561800  | -0.39167900 |
| C | 0.64159100  | 3.86574100  | 0.06405300  |
| H | -1.32911100 | 3.03448000  | -0.32162800 |
| H | -0.06989000 | 2.44765500  | -1.41926000 |
| H | 0.49850600  | 4.74631400  | -0.56848700 |
| H | 0.42465800  | 4.16141000  | 1.09534900  |
| H | 1.68785800  | 3.55974800  | 0.00573600  |
| O | -1.88567400 | -2.23015500 | -0.24455500 |
| N | -2.46560600 | -0.99287800 | -0.15565700 |
| C | -3.74395400 | -0.96776500 | 0.04020600  |
| N | -4.45709500 | -2.12579000 | 0.24870100  |
| C | -4.44515400 | 0.33060000  | 0.09829300  |
| H | -5.39853000 | -2.14687900 | -0.11275100 |
| H | -3.90518500 | -2.95688000 | 0.07495700  |
| C | -5.54610100 | 0.50796200  | 0.94691400  |
| C | -4.02835900 | 1.39886600  | -0.70820000 |
| C | -6.20725400 | 1.73227400  | 0.99644200  |
| H | -5.86434000 | -0.30936500 | 1.58333600  |
| C | -4.69146700 | 2.62031100  | -0.65418600 |
| H | -3.19924800 | 1.24744400  | -1.38821300 |
| C | -5.78239600 | 2.79207500  | 0.19828100  |
| H | -7.05235300 | 1.85950800  | 1.66360500  |
| H | -4.36998400 | 3.43546300  | -1.29332400 |
| H | -6.30189800 | 3.74296000  | 0.23360700  |
| N | 2.43020800  | -1.02353200 | -0.13458600 |
| C | 3.71000200  | -1.01624000 | 0.05307000  |
| O | 1.83405900  | -2.25448800 | -0.22138800 |
| N | 4.40684200  | -2.18475400 | 0.25763200  |
| C | 4.43325600  | 0.27032200  | 0.10144600  |
| H | 5.34648400  | -2.21896100 | -0.10729100 |
| H | 3.84229500  | -3.00775000 | 0.08632800  |
| C | 4.02201800  | 1.34664300  | -0.69679200 |
| C | 5.55225900  | 0.42642400  | 0.93047200  |

|   |            |             |             |
|---|------------|-------------|-------------|
| C | 4.71036800 | 2.55446200  | -0.65569700 |
| H | 3.17571400 | 1.21315800  | -1.35911200 |
| C | 6.23806100 | 1.63745000  | 0.96776900  |
| H | 5.86564600 | -0.39646500 | 1.56213000  |
| C | 5.82004400 | 2.70488000  | 0.17638200  |
| H | 4.39239300 | 3.37603400  | -1.28821000 |
| H | 7.09687000 | 1.74836900  | 1.62017800  |
| H | 6.35837800 | 3.64556000  | 0.20189100  |

**U-M9-M9-T1**

|   |             |             |             |
|---|-------------|-------------|-------------|
| U | 1.47830700  | -0.46367500 | -0.11346000 |
| O | 1.48385000  | -0.57870800 | -1.89365500 |
| O | 1.65366400  | -0.37526800 | 1.66011200  |
| O | 3.99510000  | -0.54237700 | -0.24946700 |
| H | 4.34530300  | -0.37785000 | -1.13287800 |
| C | 4.93035900  | -0.06186700 | 0.75654200  |
| C | 5.19292500  | 1.42652700  | 0.61604200  |
| H | 5.84782900  | -0.65230600 | 0.67586800  |
| H | 4.44836900  | -0.29455100 | 1.70482700  |
| H | 5.86396500  | 1.75981600  | 1.41286800  |
| H | 5.67248500  | 1.65742800  | -0.34072500 |
| H | 4.25752800  | 1.98522200  | 0.68171400  |
| O | 0.85708600  | -2.64986400 | 0.05056200  |
| N | -0.37503800 | -2.04918000 | -0.02321300 |
| C | -1.39829600 | -2.83583300 | 0.06996600  |
| N | -1.23540900 | -4.17408100 | 0.34662000  |
| C | -2.76605100 | -2.29839400 | -0.07500900 |
| H | -1.90735300 | -4.80198500 | -0.06729600 |
| H | -0.26828200 | -4.46733600 | 0.28579700  |
| C | -3.83534800 | -2.89346400 | 0.60967500  |
| C | -3.01949900 | -1.20800200 | -0.91786900 |
| C | -5.12968700 | -2.40594000 | 0.45438300  |
| H | -3.64405700 | -3.72247000 | 1.28096900  |
| C | -4.31362500 | -0.72253400 | -1.06660500 |
| H | -2.19869200 | -0.75722000 | -1.46106000 |
| C | -5.37295900 | -1.32044700 | -0.38465600 |
| H | -5.94725600 | -2.87092200 | 0.99394800  |
| H | -4.49591000 | 0.12224800  | -1.72043600 |
| H | -6.38188600 | -0.94302100 | -0.50791900 |
| N | 0.49985700  | 1.76251000  | -0.09382500 |
| C | -0.12039200 | 2.89736700  | -0.13357000 |
| O | 1.85937800  | 1.80343700  | -0.27344100 |
| N | 0.55003300  | 4.05427800  | -0.46251300 |

|   |             |            |             |
|---|-------------|------------|-------------|
| C | -1.57163100 | 2.96516800 | 0.12978500  |
| H | 0.23047100  | 4.89925800 | -0.01407400 |
| H | 1.55367800  | 3.92512200 | -0.48557500 |
| C | -2.35622500 | 3.95037000 | -0.48687300 |
| C | -2.17866900 | 2.06947400 | 1.02030100  |
| C | -3.71906200 | 4.03581700 | -0.21776800 |
| H | -1.89821400 | 4.63189900 | -1.19417200 |
| C | -3.54117600 | 2.15620100 | 1.28200300  |
| H | -1.57273600 | 1.31920500 | 1.51211800  |
| C | -4.31516100 | 3.14037700 | 0.66793600  |
| H | -4.31619600 | 4.79847000 | -0.70512600 |
| H | -3.99876900 | 1.45651200 | 1.97152700  |
| H | -5.37623400 | 3.20917900 | 0.87986700  |

**U-M9-M10-T1**

|   |             |             |             |
|---|-------------|-------------|-------------|
| U | 1.21180100  | -0.75671700 | 0.01311400  |
| O | 0.85409100  | -0.90444300 | -1.72951700 |
| O | 1.61232200  | -0.65602100 | 1.75105600  |
| O | 3.42496900  | -1.90094000 | -0.39204500 |
| H | 3.68041700  | -2.00405400 | -1.31594500 |
| C | 4.60943500  | -1.82557900 | 0.44869800  |
| C | 5.46941700  | -0.62375000 | 0.10189800  |
| H | 5.15655400  | -2.76765800 | 0.35014400  |
| H | 4.21781100  | -1.75749500 | 1.46254500  |
| H | 6.32455200  | -0.57201800 | 0.78192600  |
| H | 5.85990500  | -0.69465800 | -0.91837200 |
| H | 4.88975600  | 0.29695700  | 0.19096600  |
| O | 2.47141900  | 1.14173400  | -0.42589200 |
| N | 1.24529900  | 1.65712500  | -0.11882600 |
| C | 1.05419600  | 2.91439900  | -0.35794500 |
| N | 2.01379700  | 3.67190400  | -0.98718500 |
| C | -0.24077900 | 3.53349600  | -0.00963400 |
| H | 2.07696000  | 4.64130300  | -0.71621700 |
| H | 2.89583700  | 3.18436400  | -1.08127400 |
| C | -0.79936800 | 4.52132000  | -0.83222200 |
| C | -0.92281300 | 3.15063700  | 1.15443000  |
| C | -2.02298500 | 5.09937000  | -0.50605700 |
| H | -0.28226100 | 4.81397600  | -1.73846900 |
| C | -2.14697000 | 3.72963600  | 1.47458000  |
| H | -0.46762500 | 2.42052900  | 1.81291300  |
| C | -2.70185500 | 4.70422400  | 0.64480500  |
| H | -2.44983200 | 5.85506000  | -1.15569700 |
| H | -2.66013900 | 3.43469400  | 2.38311500  |

|   |             |             |             |
|---|-------------|-------------|-------------|
| H | -3.65275100 | 5.15827200  | 0.89903800  |
| N | -1.38406000 | -2.70411200 | 0.21860700  |
| C | -2.07389500 | -1.61957300 | 0.14299200  |
| O | -0.07370600 | -2.54364500 | 0.41278900  |
| N | -1.38430000 | -0.33592400 | 0.25795100  |
| C | -3.53448000 | -1.67309700 | -0.03842100 |
| H | -1.66234400 | 0.28751500  | -0.49721700 |
| C | -4.18469500 | -2.91132600 | -0.19878300 |
| C | -4.31446300 | -0.50739800 | -0.05274700 |
| C | -5.55964900 | -2.97105400 | -0.36579100 |
| H | -3.58794000 | -3.81378500 | -0.18871300 |
| C | -5.69686200 | -0.57360500 | -0.22135200 |
| H | -3.85210400 | 0.46512100  | 0.07078200  |
| C | -6.32630300 | -1.80289300 | -0.37865900 |
| H | -6.04064800 | -3.93522100 | -0.48855100 |
| H | -6.27836500 | 0.34162300  | -0.22936800 |
| H | -7.40095700 | -1.85491900 | -0.51107100 |
| H | -1.64801400 | 0.13308600  | 1.12327100  |

**U-M9-M10-T2**

|   |             |             |             |
|---|-------------|-------------|-------------|
| U | -0.13097000 | 0.67386400  | -0.22314900 |
| O | -0.24172600 | 0.86726100  | -1.99694900 |
| O | 0.18638800  | 0.68517700  | 1.53599800  |
| O | 0.54068100  | 3.13513000  | -0.23724300 |
| H | 0.21898700  | 3.57094300  | -1.03554600 |
| C | 0.45195600  | 4.05058500  | 0.89046200  |
| C | -0.93425100 | 4.65225300  | 1.03031500  |
| H | 1.21994900  | 4.82003600  | 0.76261100  |
| H | 0.70853300  | 3.44054500  | 1.75554100  |
| H | -0.96377300 | 5.30754100  | 1.90552800  |
| H | -1.19433000 | 5.25709200  | 0.15524800  |
| H | -1.68100900 | 3.86538800  | 1.14656100  |
| O | -2.18230200 | 1.71634700  | 0.08748700  |
| N | -2.48423500 | 0.38108000  | 0.06898200  |
| C | -3.73037800 | 0.04414200  | 0.16270700  |
| N | -4.71225600 | 1.00582800  | 0.18644300  |
| C | -4.11019400 | -1.38248700 | 0.17575700  |
| H | -5.53713700 | 0.79593600  | 0.72692100  |
| H | -4.34074400 | 1.94052400  | 0.29650700  |
| C | -5.37454800 | -1.77872600 | -0.28213200 |
| C | -3.21890400 | -2.35923400 | 0.64209900  |
| C | -5.73961900 | -3.12177500 | -0.27178200 |
| H | -6.05884300 | -1.03656400 | -0.67626500 |
| C | -3.58564400 | -3.69948300 | 0.64254300  |

|   |             |             |             |
|---|-------------|-------------|-------------|
| H | -2.24429900 | -2.06373900 | 1.00907700  |
| C | -4.84716800 | -4.08595600 | 0.18998400  |
| H | -6.71792600 | -3.41483500 | -0.63571900 |
| H | -2.88538100 | -4.44403300 | 1.00319200  |
| H | -5.13063500 | -5.13231100 | 0.19590300  |
| N | 2.01292700  | -1.79837800 | -0.18527200 |
| C | 2.92704200  | -0.89266200 | -0.22786600 |
| O | 0.76978800  | -1.36119300 | -0.39850500 |
| N | 2.53711500  | 0.48688700  | -0.50744700 |
| C | 4.33971700  | -1.24497100 | -0.00757900 |
| H | 3.05422300  | 1.12793900  | 0.08891600  |
| C | 4.68684400  | -2.53315800 | 0.44086700  |
| C | 5.37092500  | -0.32275000 | -0.23877600 |
| C | 6.01455500  | -2.87593700 | 0.64580600  |
| H | 3.89530000  | -3.24823900 | 0.62184000  |
| C | 6.70411800  | -0.67195600 | -0.02955900 |
| H | 5.14490100  | 0.67508800  | -0.59743900 |
| C | 7.03290500  | -1.94789900 | 0.41364800  |
| H | 6.26048900  | -3.87339400 | 0.99295900  |
| H | 7.48402200  | 0.05749700  | -0.21774200 |
| H | 8.06918700  | -2.22005300 | 0.57812700  |
| H | 2.76612600  | 0.72956000  | -1.47073100 |

**U-M9-M10-T2'**

|   |             |             |             |
|---|-------------|-------------|-------------|
| U | -0.02676000 | 0.48101600  | 0.14487400  |
| O | 0.05315400  | 0.50081500  | 1.93014200  |
| O | 0.02060300  | 0.58440800  | -1.63753100 |
| O | 1.54598700  | 2.46853500  | 0.19737800  |
| H | 1.72323900  | 2.87936100  | 1.05102800  |
| C | 1.97349400  | 3.34221800  | -0.88291300 |
| C | 3.46942800  | 3.59225700  | -0.83632400 |
| H | 1.40202000  | 4.27284400  | -0.82338200 |
| H | 1.67851200  | 2.81668700  | -1.78975800 |
| H | 3.76744400  | 4.21851100  | -1.68173600 |
| H | 3.75897700  | 4.11525000  | 0.08074900  |
| H | 4.02172100  | 2.65207300  | -0.89048100 |
| O | 0.38414000  | -1.78124400 | 0.07217500  |
| N | 1.65322100  | -1.27602700 | 0.10480200  |
| C | 2.62690500  | -2.10957700 | -0.06696700 |
| N | 2.38464500  | -3.43163500 | -0.36491100 |
| C | 4.02176100  | -1.62925400 | -0.00390300 |
| H | 3.04058200  | -4.10248900 | 0.00559000  |
| H | 1.40829800  | -3.67839400 | -0.26299500 |
| C | 5.01689100  | -2.23734600 | -0.78129300 |

|   |             |             |             |
|---|-------------|-------------|-------------|
| C | 4.37358600  | -0.56809900 | 0.84201000  |
| C | 6.33297600  | -1.78788800 | -0.71941700 |
| H | 4.74983400  | -3.04489600 | -1.45272500 |
| C | 5.68882900  | -0.12040000 | 0.89738400  |
| H | 3.61106800  | -0.11777800 | 1.46508100  |
| C | 6.67356900  | -0.72847800 | 0.11828100  |
| H | 7.09144800  | -2.26211000 | -1.33198100 |
| H | 5.95116000  | 0.69453600  | 1.56291900  |
| H | 7.69946400  | -0.38176200 | 0.16875500  |
| N | -3.18309200 | 1.37726000  | 0.08999700  |
| C | -3.42566000 | 0.11277100  | 0.03950200  |
| O | -1.89545800 | 1.71037000  | 0.18866500  |
| N | -2.29998500 | -0.81115400 | 0.09046400  |
| C | -4.80803900 | -0.38219600 | -0.06287200 |
| H | -2.35064800 | -1.41625300 | 0.90827400  |
| C | -5.88534300 | 0.52164200  | -0.12841700 |
| C | -5.09123900 | -1.75548800 | -0.09622800 |
| C | -7.18938000 | 0.06073400  | -0.22279100 |
| H | -5.67276400 | 1.58224600  | -0.10323000 |
| C | -6.40448500 | -2.21340300 | -0.19112200 |
| H | -4.28780400 | -2.48134700 | -0.04712300 |
| C | -7.45912200 | -1.31001100 | -0.25479300 |
| H | -8.00497900 | 0.77379600  | -0.27221700 |
| H | -6.59819800 | -3.28004600 | -0.21488600 |
| H | -8.48062100 | -1.66520300 | -0.32883700 |
| H | -2.28279800 | -1.42555200 | -0.72135300 |

**U-M10-M10-T1**

|   |             |             |             |
|---|-------------|-------------|-------------|
| U | 0.02425300  | 0.91143100  | -0.29495100 |
| O | 0.47118200  | 0.87857200  | 1.43446700  |
| O | -0.42862300 | 0.69694200  | -2.00670900 |
| O | -0.44221600 | 3.40199000  | -0.22450700 |
| H | -1.38314100 | 3.39903300  | 0.01501300  |
| C | 0.26781400  | 4.49327700  | 0.40633100  |
| C | 0.09436000  | 4.49816200  | 1.91541800  |
| H | -0.07892500 | 5.42859700  | -0.04346900 |
| H | 1.31092000  | 4.34783200  | 0.12424700  |
| H | 0.67186200  | 5.31719200  | 2.35345600  |
| H | -0.95445200 | 4.64221600  | 2.19221600  |
| H | 0.43929500  | 3.55695800  | 2.34760700  |
| O | 2.15802300  | 1.30835300  | -0.81902200 |
| N | 3.24242200  | 0.58419200  | -0.50394800 |
| C | 3.02974000  | -0.67821800 | -0.38041300 |

|   |             |             |             |
|---|-------------|-------------|-------------|
| N | 1.68108300  | -1.19227400 | -0.61046600 |
| C | 4.12589800  | -1.59212800 | -0.01803900 |
| H | 1.53779600  | -2.03997100 | -0.06967900 |
| C | 4.01655600  | -2.97966000 | -0.19171300 |
| C | 5.32400600  | -1.07748500 | 0.50933100  |
| C | 5.06770500  | -3.82785500 | 0.15127400  |
| H | 3.11861400  | -3.41198200 | -0.61945400 |
| C | 6.36871300  | -1.92543900 | 0.84538600  |
| H | 5.41171700  | -0.00786800 | 0.64689200  |
| C | 6.24687500  | -3.30603600 | 0.67166600  |
| H | 4.96279600  | -4.89693900 | 0.00456600  |
| H | 7.28372000  | -1.50991400 | 1.25242900  |
| H | 7.06405600  | -3.96525500 | 0.94088100  |
| N | -3.23075700 | 0.65772600  | 0.23194800  |
| C | -3.01733200 | -0.61032000 | 0.22916200  |
| O | -2.14846500 | 1.43747900  | 0.22089400  |
| N | -1.63773400 | -1.10359700 | 0.22955600  |
| C | -4.14388300 | -1.55935600 | 0.23299900  |
| H | -1.40635000 | -1.47199000 | 1.15203100  |
| C | -5.45947900 | -1.09569800 | 0.04535500  |
| C | -3.94671300 | -2.93488700 | 0.42437400  |
| C | -6.52779800 | -1.97929600 | 0.05199400  |
| H | -5.61821800 | -0.03615100 | -0.10508400 |
| C | -5.02419800 | -3.81937900 | 0.42821800  |
| H | -2.95058300 | -3.33120400 | 0.58610300  |
| C | -6.31835500 | -3.34751300 | 0.24194200  |
| H | -7.53324500 | -1.60145300 | -0.09652400 |
| H | -4.84655100 | -4.87811200 | 0.58025000  |
| H | -7.15664300 | -4.03459100 | 0.24274800  |
| H | 1.56707400  | -1.43698700 | -1.59434300 |
| H | -1.55878000 | -1.87903000 | -0.42473300 |

**U-M10-M10-T3**

|   |             |             |             |
|---|-------------|-------------|-------------|
| U | -0.00821600 | -0.27671600 | 0.01336700  |
| O | 0.34320900  | -0.33701700 | 1.77070400  |
| O | -0.35747400 | 0.19725900  | -1.67967200 |
| O | 0.02569600  | 2.26878300  | 0.45532900  |
| H | 0.17205900  | 2.54388300  | 1.36724800  |
| C | -0.40485300 | 3.38961400  | -0.35497700 |
| C | 0.63589700  | 4.49419500  | -0.39559100 |
| H | -1.35947200 | 3.76292000  | 0.03121400  |
| H | -0.57818200 | 2.96172300  | -1.34150600 |
| H | 0.28621900  | 5.31248200  | -1.03064200 |
| H | 0.82357600  | 4.90562600  | 0.60098900  |

|   |             |             |             |
|---|-------------|-------------|-------------|
| H | 1.58036000  | 4.12748700  | -0.80334700 |
| O | -1.59848700 | -1.83346500 | 0.03957000  |
| N | -2.92659300 | -1.74237800 | -0.08647800 |
| C | -3.42876600 | -0.60113400 | 0.23123400  |
| N | -2.53264800 | 0.44396600  | 0.71239700  |
| C | -4.87558500 | -0.35787700 | 0.11474800  |
| H | -2.87046800 | 1.35801200  | 0.42641900  |
| C | -5.48416200 | 0.76098300  | 0.70267700  |
| C | -5.68681200 | -1.26108400 | -0.59668900 |
| C | -6.85633800 | 0.97461200  | 0.58352500  |
| H | -4.89596600 | 1.46705100  | 1.27873800  |
| C | -7.05204800 | -1.04582200 | -0.70922500 |
| H | -5.22145700 | -2.12488500 | -1.05282500 |
| C | -7.64624200 | 0.07438800  | -0.12273200 |
| H | -7.30550400 | 1.84445900  | 1.04981200  |
| H | -7.65956100 | -1.75289000 | -1.26301800 |
| H | -8.71322400 | 0.24023600  | -0.21745500 |
| N | 2.89365600  | -1.73029400 | -0.33093200 |
| C | 3.40458700  | -0.55068600 | -0.27381300 |
| O | 1.56555700  | -1.76758800 | -0.48357900 |
| N | 2.51589000  | 0.59786800  | -0.40401500 |
| C | 4.85302900  | -0.36770800 | -0.08714200 |
| H | 2.83449800  | 1.36621300  | 0.17886800  |
| C | 5.65927500  | -1.45985900 | 0.28345300  |
| C | 5.46786500  | 0.87900900  | -0.27415900 |
| C | 7.02604200  | -1.30178300 | 0.45554000  |
| H | 5.18889900  | -2.42314700 | 0.43035700  |
| C | 6.84175400  | 1.03328100  | -0.09687500 |
| H | 4.88241800  | 1.73912600  | -0.57969700 |
| C | 7.62685300  | -0.05429300 | 0.26904400  |
| H | 7.62979400  | -2.15553900 | 0.74246000  |
| H | 7.29575300  | 2.00593200  | -0.25067500 |
| H | 8.69514100  | 0.06475300  | 0.40883500  |
| H | 2.51220300  | 0.93281800  | -1.36705300 |
| H | -2.50434300 | 0.43865800  | 1.73177100  |

**U-M10-M10-T2**

|   |             |             |             |
|---|-------------|-------------|-------------|
| U | 0.00661900  | 0.38800100  | 0.32209600  |
| O | -0.08724200 | -0.30169800 | -1.31557900 |
| O | 0.04639000  | 1.12188400  | 1.94732400  |
| O | -0.24078800 | 2.80245200  | -0.60356900 |
| H | 0.70468000  | 2.79434800  | -0.85462900 |
| C | -0.50009500 | 3.98188100  | 0.19235600  |

|                       |             |             |             |   |             |             |             |
|-----------------------|-------------|-------------|-------------|---|-------------|-------------|-------------|
| C                     | -0.28801000 | 5.25095800  | -0.61493000 | O | -0.03068100 | 0.77398200  | 1.77322200  |
| H                     | 0.13365600  | 3.96099300  | 1.08360000  | O | -0.09842900 | 0.81329300  | -1.78775200 |
| H                     | -1.53862000 | 3.89362200  | 0.51626000  | O | 2.04845100  | 2.19051300  | 0.02902800  |
| H                     | -0.53341100 | 6.12793200  | -0.00920000 | H | 1.63339400  | 3.03420400  | 0.26188100  |
| H                     | 0.75478200  | 5.34438900  | -0.93096500 | O | -0.30681800 | 3.46881300  | 0.00094300  |
| H                     | -0.92012400 | 5.25572700  | -1.50572200 | H | -1.10055900 | 3.38447400  | 0.55005100  |
| O                     | 1.95872500  | 1.48173300  | -0.28975900 | C | -0.69958900 | 4.08089000  | -1.25673400 |
| N                     | 3.14980100  | 0.91561500  | -0.53141000 | C | -1.04666100 | 5.54849700  | -1.07423900 |
| C                     | 3.32791200  | -0.26363700 | -0.05041500 | H | -1.53449300 | 3.51146900  | -1.66934600 |
| N                     | 2.25139700  | -0.89962300 | 0.71135100  | H | 0.15909300  | 3.95163000  | -1.91593200 |
| C                     | 4.60641800  | -0.96825600 | -0.25276700 | H | -1.29746900 | 5.99664600  | -2.04002000 |
| H                     | 2.14988400  | -1.87347200 | 0.43061200  | H | -1.91163800 | 5.67119700  | -0.41562100 |
| C                     | 4.89475800  | -2.16990800 | 0.41054500  | H | -0.20691600 | 6.10104200  | -0.64576200 |
| C                     | 5.57691500  | -0.43747000 | -1.12258700 | C | 3.34915900  | 2.08214700  | 0.63914800  |
| C                     | 6.11155600  | -2.82088100 | 0.21423000  | C | 3.29188500  | 2.21033600  | 2.15313200  |
| H                     | 4.17799700  | -2.60812500 | 1.09560100  | H | 4.00253700  | 2.84425000  | 0.20011400  |
| C                     | 6.78606200  | -1.08852700 | -1.31340800 | H | 3.72577600  | 1.10616300  | 0.33728600  |
| H                     | 5.35873600  | 0.48775700  | -1.63909200 | H | 4.29002400  | 2.07540200  | 2.58036600  |
| C                     | 7.06183500  | -2.28519800 | -0.64733600 | H | 2.93351900  | 3.20024900  | 2.45296800  |
| H                     | 6.31244300  | -3.74779400 | 0.73949200  | H | 2.61944900  | 1.46368000  | 2.57971500  |
| H                     | 7.51981100  | -0.66399700 | -1.98953400 | O | -2.24846500 | 1.66827700  | 0.08600700  |
| H                     | 8.00723300  | -2.79230600 | -0.80214900 | N | -2.50510400 | 0.32561200  | 0.09561800  |
| N                     | -2.38839000 | -1.75893900 | 0.74422300  | C | -3.74168400 | -0.04469200 | 0.16549300  |
| C                     | -3.16356300 | -0.86450300 | 0.23972600  | N | -4.75468200 | 0.89253700  | 0.14848500  |
| O                     | -1.17336800 | -1.32660100 | 1.10250000  | C | -4.08667200 | -1.48012700 | 0.20242000  |
| N                     | -2.66633000 | 0.50424400  | 0.09309500  | H | -5.56811200 | 0.67057000  | 0.70259500  |
| C                     | -4.53527200 | -1.21131200 | -0.17174900 | H | -4.40052300 | 1.83284000  | 0.27037900  |
| H                     | -2.90700500 | 0.86502200  | -0.82781900 | C | -5.36440600 | -1.90638400 | -0.18683700 |
| C                     | -4.96815100 | -2.54988300 | -0.13513800 | C | -3.15046200 | -2.43500600 | 0.62711600  |
| C                     | -5.44136600 | -0.23148300 | -0.60236100 | C | -5.70543000 | -3.25543000 | -0.14132800 |
| C                     | -6.25835900 | -2.88531000 | -0.51583400 | H | -6.08263500 | -1.18360800 | -0.55580800 |
| H                     | -4.27315600 | -3.31031700 | 0.19534400  | C | -3.49734800 | -3.78013000 | 0.66582700  |
| C                     | -6.73734800 | -0.57413900 | -0.98431200 | H | -2.15557800 | -2.12056900 | 0.91516300  |
| H                     | -5.14872200 | 0.81159900  | -0.63857000 | C | -4.77432000 | -4.19699500 | 0.28812200  |
| C                     | -7.15196200 | -1.90030500 | -0.94373000 | H | -6.69600700 | -3.56958400 | -0.45081200 |
| H                     | -6.57186300 | -3.92272300 | -0.48210900 | H | -2.76661400 | -4.50852100 | 0.99978500  |
| H                     | -7.42050100 | 0.20087000  | -1.31313900 | H | -5.03897200 | -5.24786400 | 0.32529300  |
| H                     | -8.15887500 | -2.16778400 | -1.24280400 | N | 1.30787700  | -1.31971300 | -0.01100600 |
| H                     | 2.47939000  | -0.90839500 | 1.70554900  | C | 2.05978300  | -2.31031300 | -0.37707300 |
| H                     | -3.11832900 | 1.11316600  | 0.77451100  | O | -0.04269900 | -1.56058800 | -0.07231500 |
|                       |             |             |             | N | 1.51659500  | -3.46435800 | -0.88673200 |
|                       |             |             |             | C | 3.53042400  | -2.20074500 | -0.29042700 |
|                       |             |             |             | H | 2.00138800  | -4.32658100 | -0.69304900 |
|                       |             |             |             | H | 0.50728000  | -3.48978800 | -0.81277900 |
| <b>Cis-U-M9-M9-T2</b> |             |             |             |   |             |             |             |
| U                     | -0.11974500 | 0.71084600  | -0.01008800 |   |             |             |             |

|   |            |             |             |
|---|------------|-------------|-------------|
| C | 4.34310000 | -2.75991000 | -1.28628800 |
| C | 4.13338500 | -1.56759900 | 0.80429400  |
| C | 5.72900500 | -2.67076500 | -1.19595200 |
| H | 3.88102400 | -3.24250100 | -2.13951800 |
| C | 5.51977700 | -1.48166900 | 0.89068900  |
| H | 3.50397600 | -1.16830500 | 1.59008200  |
| C | 6.32177400 | -2.03110300 | -0.10883100 |
| H | 6.34682100 | -3.09668500 | -1.97853500 |
| H | 5.97614300 | -0.99923600 | 1.74800800  |
| H | 7.40165900 | -1.96731400 | -0.03725200 |

### Cis-U-M9-M9-T3

|   |             |             |             |
|---|-------------|-------------|-------------|
| U | 0.02178000  | -0.48283200 | -0.11590000 |
| O | -0.13544900 | -0.60550800 | 1.66043900  |
| O | 0.12168300  | -0.11349300 | -1.86152800 |
| O | 1.12031800  | 1.83901200  | 0.58945400  |
| H | 0.31231100  | 2.32516400  | 0.80259400  |
| O | -1.48537200 | 1.79367700  | -0.10782100 |
| H | -2.37604300 | 1.50082300  | 0.12890000  |
| C | -1.55532500 | 2.60092200  | -1.31103400 |
| C | -2.28438200 | 3.91109500  | -1.06456300 |
| H | -2.02223300 | 2.01747900  | -2.10815800 |
| H | -0.51720300 | 2.76834300  | -1.59594800 |
| H | -2.29580300 | 4.50986600  | -1.97989500 |
| H | -3.32101100 | 3.73852900  | -0.76220000 |
| H | -1.79190900 | 4.49309400  | -0.28171900 |
| C | 2.09820600  | 2.05890200  | 1.63404000  |
| C | 1.48395500  | 2.01717200  | 3.02311000  |
| H | 2.58977900  | 3.01935000  | 1.44455600  |
| H | 2.83777900  | 1.27116800  | 1.50423500  |
| H | 2.26235400  | 2.16390600  | 3.77742500  |
| H | 0.74476800  | 2.81555300  | 3.15374700  |
| H | 0.99611900  | 1.05775100  | 3.19995100  |
| O | -1.41153100 | -2.24427100 | -0.40923900 |
| N | -2.32368100 | -1.23456300 | -0.32113400 |
| C | -3.53533700 | -1.59077700 | -0.02795200 |
| N | -3.84311300 | -2.89978500 | 0.26199000  |
| C | -4.59239600 | -0.56531800 | 0.07151600  |
| H | -4.74668400 | -3.23229900 | -0.03888800 |
| H | -3.06437900 | -3.52272100 | 0.08104100  |
| C | -5.57027700 | -0.64638600 | 1.07343500  |
| C | -4.64551200 | 0.49698700  | -0.84333400 |
| C | -6.56195400 | 0.32500200  | 1.17037300  |

|   |             |             |             |
|---|-------------|-------------|-------------|
| H | -5.53225100 | -1.46297700 | 1.78457200  |
| C | -5.64015000 | 1.46700600  | -0.74144900 |
| H | -3.92859100 | 0.52300500  | -1.65533900 |
| C | -6.59921100 | 1.38643700  | 0.26729600  |
| H | -7.30513700 | 0.25630500  | 1.95679200  |
| H | -5.68172800 | 2.27303000  | -1.46584400 |
| H | -7.37649800 | 2.13830700  | 0.34143900  |
| N | 2.38844100  | -1.12291900 | -0.15885400 |
| C | 3.65021900  | -1.41089800 | -0.16552600 |
| O | 1.52934500  | -2.18412600 | -0.21252800 |
| N | 4.07486600  | -2.72093600 | -0.08754400 |
| C | 4.65955700  | -0.33411100 | -0.20350800 |
| H | 4.91299200  | -2.94567700 | -0.60258800 |
| H | 3.30847700  | -3.37295600 | -0.20908700 |
| C | 4.40436400  | 0.85912900  | -0.89474300 |
| C | 5.89892500  | -0.50038500 | 0.43114200  |
| C | 5.36386200  | 1.86491700  | -0.93594800 |
| H | 3.45645600  | 0.97968600  | -1.40406000 |
| C | 6.85667400  | 0.50867500  | 0.38414100  |
| H | 6.09678300  | -1.41409100 | 0.97928200  |
| C | 6.59278800  | 1.69440600  | -0.29827600 |
| H | 5.15729800  | 2.78021100  | -1.47951800 |
| H | 7.80792800  | 0.37014100  | 0.88583700  |
| H | 7.34104800  | 2.47801600  | -0.33808300 |

### Cis-U-M9-M9-T1

|   |            |             |             |
|---|------------|-------------|-------------|
| U | 1.29944000 | -0.04156200 | -0.02204900 |
| O | 1.33827500 | 0.05062200  | 1.75987600  |
| O | 1.38492300 | -0.10048600 | -1.80150300 |
| O | 3.59590200 | -1.25160700 | 0.15149400  |
| H | 4.13924200 | -0.69773400 | 0.72529200  |
| O | 3.49407700 | 1.46477100  | 0.06927000  |
| H | 2.95642800 | 2.21558500  | 0.36899900  |
| C | 4.15366800 | 1.83672600  | -1.16572100 |
| C | 5.23327900 | 2.87925800  | -0.92673300 |
| H | 3.40363400 | 2.18900800  | -1.87844300 |
| H | 4.57641100 | 0.90882900  | -1.55188400 |
| H | 5.74961200 | 3.10732900  | -1.86371300 |
| H | 4.80549500 | 3.81139500  | -0.54598800 |
| H | 5.97044100 | 2.51983000  | -0.20475900 |
| C | 3.86340000 | -2.65030300 | 0.40252500  |
| C | 3.63530200 | -3.03090500 | 1.85504500  |
| H | 4.88924500 | -2.86440800 | 0.08325600  |

|                         |             |             |             |   |             |             |             |
|-------------------------|-------------|-------------|-------------|---|-------------|-------------|-------------|
| H                       | 3.17535800  | -3.18238100 | -0.25161900 | O | 1.83509800  | -1.84552400 | 0.03346500  |
| H                       | 3.84264800  | -4.09591600 | 1.99720300  | H | -0.82946100 | 2.69434700  | -0.11554400 |
| H                       | 4.29766500  | -2.47163700 | 2.52411300  | H | 2.73365200  | -1.49317600 | 0.06204600  |
| H                       | 2.60046100  | -2.83390700 | 2.13716700  | C | 1.75676600  | -3.05771600 | 0.82067500  |
| O                       | 1.00249100  | 2.27797300  | -0.13123800 | C | 2.17906100  | -2.83043600 | 2.26263000  |
| N                       | -0.27755600 | 1.84292000  | 0.08297800  | H | 2.37410200  | -3.82084200 | 0.33480600  |
| C                       | -1.18913200 | 2.75520000  | 0.17817900  | H | 0.71321500  | -3.35961000 | 0.75492600  |
| N                       | -0.89036400 | 4.07996600  | -0.06614300 | H | 2.07235100  | -3.75796300 | 2.83302700  |
| C                       | -2.57922400 | 2.39421600  | 0.51998600  | H | 3.22652000  | -2.51826800 | 2.32739300  |
| H                       | -1.39444200 | 4.75593600  | 0.48781700  | H | 1.55651200  | -2.06190100 | 2.72401800  |
| H                       | 0.10680700  | 4.23865300  | -0.13508300 | C | -2.22727300 | 2.39635000  | 1.26241000  |
| C                       | -3.64764200 | 3.17448100  | 0.05572100  | C | -2.90191400 | 3.75247200  | 1.14761400  |
| C                       | -2.84710100 | 1.29462300  | 1.34654500  | H | -1.52131200 | 2.36513400  | 2.09695000  |
| C                       | -4.95611000 | 2.86070500  | 0.41228900  | H | -2.96006100 | 1.60339400  | 1.40727300  |
| H                       | -3.45015700 | 4.01350200  | -0.60136200 | H | -3.44937400 | 3.97753000  | 2.06739500  |
| C                       | -4.15577800 | 0.98379000  | 1.69615800  | H | -2.16761000 | 4.54949900  | 0.99367500  |
| H                       | -2.02299700 | 0.69876800  | 1.71745100  | H | -3.60756600 | 3.76529900  | 0.31430100  |
| C                       | -5.21367600 | 1.76599400  | 1.23458100  | O | 1.13694000  | 2.07935400  | -0.03445900 |
| H                       | -5.77434200 | 3.46888500  | 0.04275700  | N | 2.17271400  | 1.21426900  | -0.17806300 |
| H                       | -4.35021100 | 0.12913900  | 2.33351900  | C | 3.36987100  | 1.69425000  | -0.09180000 |
| H                       | -6.23260000 | 1.52263800  | 1.51382700  | N | 3.59281300  | 3.01518600  | 0.24171900  |
| N                       | -0.36462200 | -1.81527400 | -0.11759700 | C | 4.52356100  | 0.79254700  | -0.28245000 |
| C                       | -1.32265000 | -2.67922700 | -0.21126600 | H | 4.37845300  | 3.45845700  | -0.21138700 |
| O                       | 0.89220500  | -2.31443800 | 0.08903400  | H | 2.73653900  | 3.55563500  | 0.22827700  |
| N                       | -1.08797900 | -4.01710700 | 0.03132900  | C | 5.69925400  | 0.97166700  | 0.45989500  |
| C                       | -2.69391100 | -2.24854300 | -0.54736000 | C | 4.46313800  | -0.25122000 | -1.21981500 |
| H                       | -1.62875200 | -4.66613400 | -0.52035900 | C | 6.78126100  | 0.11402900  | 0.28273100  |
| H                       | -0.09846000 | -4.22334300 | 0.08940800  | H | 5.74931200  | 1.77086100  | 1.18996000  |
| C                       | -3.79801600 | -2.97617900 | -0.08069000 | C | 5.54618100  | -1.11027700 | -1.38648900 |
| C                       | -2.91107500 | -1.13443400 | -1.36953100 | H | 3.57682500  | -0.35900300 | -1.83406400 |
| C                       | -5.09089300 | -2.59710900 | -0.43051500 | C | 6.70790200  | -0.93148600 | -0.63598500 |
| H                       | -3.63952300 | -3.82595200 | 0.57315800  | H | 7.68138300  | 0.25796800  | 0.86979400  |
| C                       | -4.20425900 | -0.75831300 | -1.71250600 | H | 5.48882600  | -1.90819900 | -2.11833200 |
| H                       | -2.06064900 | -0.57828700 | -1.74265500 | H | 7.55276000  | -1.59668000 | -0.77290100 |
| C                       | -5.29772100 | -1.48862600 | -1.24856100 | O | -1.04974500 | -2.05868400 | -0.10368700 |
| H                       | -5.93653200 | -3.16525400 | -0.05894500 | N | -2.10065500 | -1.19167800 | -0.13527700 |
| H                       | -4.35888300 | 0.10699500  | -2.34641600 | C | -3.28536600 | -1.70769500 | -0.17745100 |
| H                       | -6.30452900 | -1.19420600 | -1.52256700 | N | -3.46334600 | -3.07407000 | -0.07679400 |
|                         |             |             |             | C | -4.47497700 | -0.83905500 | -0.27926700 |
|                         |             |             |             | H | -4.22611000 | -3.45477200 | -0.61732900 |
|                         |             |             |             | H | -2.58717100 | -3.57299400 | -0.17382000 |
|                         |             |             |             | C | -5.70023300 | -1.25355600 | 0.26251700  |
|                         |             |             |             | C | -4.40658400 | 0.39820300  | -0.93652500 |
|                         |             |             |             | C | -6.83065300 | -0.44855900 | 0.15223300  |
| <b>Trans-U-M9-M9-T2</b> |             |             |             |   |             |             |             |
| U                       | 0.03459800  | -0.01221400 | -0.08633100 |   |             |             |             |
| O                       | 0.02551500  | 0.04079200  | -1.86624100 |   |             |             |             |
| O                       | -1.53332400 | 2.04740500  | 0.04081000  |   |             |             |             |
| O                       | 0.03266400  | -0.01659800 | 1.69959400  |   |             |             |             |



|   |             |             |             |
|---|-------------|-------------|-------------|
| H | -5.75661500 | -2.19756700 | 0.79169200  |
| C | -5.53860800 | 1.19926400  | -1.04021000 |
| H | -3.46651200 | 0.71931500  | -1.36615700 |
| C | -6.75457100 | 0.77991900  | -0.49970100 |
| H | -7.76957900 | -0.77942400 | 0.58194300  |
| H | -5.47503500 | 2.14943300  | -1.55895900 |
| H | -7.63583000 | 1.40507300  | -0.58953900 |

**Trans-U-M9-M9-T1**

|   |             |             |             |
|---|-------------|-------------|-------------|
| U | 0.00700100  | -1.01202900 | -0.16687800 |
| O | 0.04114300  | -0.77449100 | -1.93040400 |
| O | 0.21781100  | 1.54808200  | 0.17634600  |
| O | -0.00381300 | -1.11966700 | 1.61757500  |
| O | 0.08787900  | -3.57109200 | -0.28313000 |
| H | 1.14165500  | 1.79048000  | 0.02867300  |
| H | 1.02233100  | -3.76440900 | -0.13166400 |
| C | -0.75279200 | -4.53608000 | 0.38123100  |
| C | -0.40804400 | -4.68345400 | 1.85441300  |
| H | -0.66631100 | -5.49126200 | -0.14844900 |
| H | -1.76441900 | -4.15622700 | 0.24875900  |
| H | -1.08994200 | -5.39465700 | 2.33002500  |
| H | 0.61160900  | -5.05996700 | 1.98825800  |
| H | -0.49059500 | -3.72171000 | 2.36358100  |
| C | -0.25497400 | 2.19782400  | 1.38178400  |
| C | -0.16118900 | 3.70957000  | 1.27402300  |
| H | 0.30706100  | 1.81572100  | 2.23932300  |
| H | -1.28855800 | 1.87238000  | 1.48735600  |
| H | -0.55054200 | 4.17218900  | 2.18551600  |
| H | 0.87539800  | 4.03616600  | 1.14764000  |
| H | -0.74718000 | 4.07291500  | 0.42800100  |
| O | 2.15063100  | -1.94368600 | -0.28458700 |
| N | 2.46597500  | -0.63755500 | -0.07739500 |
| C | 3.68863800  | -0.28673200 | -0.31700700 |
| N | 4.60031800  | -1.17124400 | -0.85111800 |
| C | 4.10013800  | 1.11059100  | -0.07653600 |
| H | 5.55294300  | -1.08570900 | -0.52989500 |
| H | 4.23933000  | -2.11643000 | -0.88630400 |
| C | 5.00672200  | 1.74542400  | -0.93728500 |
| C | 3.60252200  | 1.81811700  | 1.02835000  |
| C | 5.38961500  | 3.06372100  | -0.70856800 |
| H | 5.38862600  | 1.20575800  | -1.79573800 |
| C | 3.98785600  | 3.13768500  | 1.25103600  |
| H | 2.94746500  | 1.30806900  | 1.72480300  |

|   |             |             |             |
|---|-------------|-------------|-------------|
| C | 4.88019900  | 3.76552000  | 0.38265700  |
| H | 6.08276800  | 3.54668100  | -1.38808900 |
| H | 3.60871400  | 3.66952200  | 2.11666000  |
| H | 5.18385500  | 4.79066400  | 0.56108500  |
| O | -2.15646400 | -1.81671100 | -0.23148100 |
| N | -2.39030000 | -0.47504600 | -0.20144400 |
| C | -3.62623800 | -0.09627500 | -0.19820100 |
| N | -4.65183400 | -1.01718500 | -0.09983400 |
| C | -3.96183900 | 1.34034200  | -0.25349600 |
| H | -5.48900500 | -0.79365800 | -0.61785900 |
| H | -4.31710100 | -1.96434700 | -0.22956800 |
| C | -5.12094200 | 1.82392600  | 0.37002400  |
| C | -3.14310500 | 2.23601600  | -0.95645200 |
| C | -5.44980000 | 3.17479600  | 0.29817300  |
| H | -5.74930800 | 1.14000500  | 0.92848300  |
| C | -3.47702000 | 3.58445200  | -1.02462200 |
| H | -2.25760000 | 1.86076300  | -1.45376200 |
| C | -4.63026000 | 4.05946400  | -0.39925400 |
| H | -6.34507300 | 3.53664200  | 0.79143500  |
| H | -2.84342700 | 4.26512900  | -1.58255500 |
| H | -4.89032300 | 5.11022500  | -0.46055500 |

**Cis-U-M8-M8**

|   |             |             |             |
|---|-------------|-------------|-------------|
| U | 0.03759800  | -1.12463300 | -0.25408200 |
| O | 0.06753300  | -2.22459000 | -1.66498500 |
| O | 0.00170700  | -0.24683400 | 1.29442900  |
| O | 2.40549400  | -1.82458900 | 0.31648500  |
| H | 2.81518800  | -0.91956200 | 0.19070600  |
| O | -1.01951000 | -3.05286900 | 1.00433500  |
| C | -1.73856300 | -2.96808500 | 2.27034700  |
| C | -3.19611200 | -2.59705100 | 2.07189700  |
| H | -1.20477400 | -2.20368600 | 2.83269400  |
| H | -1.62232300 | -3.92704700 | 2.78430800  |
| H | -3.69426000 | -2.54456000 | 3.04448300  |
| H | -3.28972300 | -1.62692100 | 1.57877600  |
| H | -3.71949200 | -3.35055100 | 1.47371600  |
| C | 3.19649000  | -2.80105000 | -0.38955600 |
| C | 4.47639700  | -3.12111600 | 0.36704600  |
| H | 3.40975100  | -2.43070700 | -1.39736600 |
| H | 2.57071100  | -3.68932900 | -0.48852000 |
| H | 5.05026000  | -3.88578800 | -0.16515000 |
| H | 5.10603800  | -2.23301200 | 0.46758000  |
| H | 4.24850500  | -3.49203700 | 1.36886700  |

|   |             |             |             |   |             |             |             |
|---|-------------|-------------|-------------|---|-------------|-------------|-------------|
| O | 1.43740000  | 0.37406000  | -1.16012400 | C | -0.87674100 | -1.64908900 | -3.04931500 |
| N | 2.64730500  | 0.65645500  | -0.54838500 | C | -2.38614400 | -1.79915300 | -3.02290200 |
| C | 2.98374000  | 1.90669500  | -0.61108500 | H | -0.40183500 | -2.25448800 | -2.27884600 |
| N | 2.14612000  | 2.86518900  | -1.12810600 | H | -0.45037000 | -1.92229800 | -4.01921600 |
| C | 4.28348300  | 2.32941500  | -0.04533800 | H | -2.65380400 | -2.83781600 | -3.23863700 |
| H | 1.34656600  | 2.46798300  | -1.60506200 | H | -2.78752300 | -1.52952900 | -2.04347200 |
| H | 2.58320900  | 3.65222300  | -1.58181900 | H | -2.86094800 | -1.17139600 | -3.78445200 |
| C | 4.42242900  | 3.59437100  | 0.54178400  | C | 1.05951200  | 2.76841000  | 2.26315500  |
| C | 5.39492000  | 1.47717700  | -0.09000200 | C | 2.57563000  | 2.80221100  | 2.20252300  |
| C | 5.64419300  | 3.99387000  | 1.07631300  | H | 0.68704400  | 2.99487300  | 3.26690600  |
| H | 3.56247800  | 4.25093700  | 0.60293500  | H | 0.61572700  | 3.47631800  | 1.56387300  |
| C | 6.61247200  | 1.87841400  | 0.44811200  | H | 2.93220800  | 3.79813500  | 2.48089000  |
| H | 5.29479700  | 0.50882100  | -0.56362400 | H | 3.01689500  | 2.08378400  | 2.90018800  |
| C | 6.74234200  | 3.13815900  | 1.03235100  | H | 2.93121300  | 2.56857000  | 1.19813400  |
| H | 5.73502100  | 4.97185300  | 1.53552500  | O | 2.18726700  | 0.61049800  | -0.65632700 |
| H | 7.46596900  | 1.21115700  | 0.40283800  | N | 3.02387700  | -0.31826400 | -0.04366200 |
| H | 7.69361800  | 3.45047000  | 1.44811300  | C | 4.26999300  | -0.07158000 | -0.29487900 |
| N | -2.87434300 | 0.28645500  | -0.09481900 | N | 4.69469300  | 1.03788800  | -1.00640300 |
| C | -3.81963500 | 0.75759300  | -0.84587000 | C | 5.29086700  | -0.98081100 | 0.27454500  |
| O | -1.96244500 | -0.46482000 | -0.83168100 | H | 3.92129500  | 1.49324300  | -1.47646600 |
| N | -3.94485900 | 0.46171100  | -2.18860000 | H | 5.51309300  | 0.90198400  | -1.58137400 |
| C | -4.85793500 | 1.60057900  | -0.20910600 | C | 6.60559400  | -0.54360600 | 0.48465900  |
| H | -4.30974400 | 1.19859300  | -2.77305700 | C | 4.95279000  | -2.29779400 | 0.61921300  |
| H | -3.12513400 | -0.00778400 | -2.55255700 | C | 7.56120400  | -1.40408500 | 1.02064600  |
| C | -6.14000100 | 1.70168500  | -0.76549200 | H | 6.87325500  | 0.48116100  | 0.25511900  |
| C | -4.57100400 | 2.31114100  | 0.96541200  | C | 5.90765300  | -3.15082700 | 1.15807200  |
| C | -7.11165000 | 2.49820300  | -0.16396700 | H | 3.93624300  | -2.63139900 | 0.45573600  |
| H | -6.38388500 | 1.13269900  | -1.65509300 | C | 7.21684000  | -2.71001700 | 1.35816600  |
| C | -5.54496300 | 3.10026700  | 1.56481600  | H | 8.57314000  | -1.04905400 | 1.18179700  |
| H | -3.57852700 | 2.23290100  | 1.39010600  | H | 5.63283800  | -4.16721400 | 1.41797400  |
| C | -6.81809500 | 3.20040300  | 1.00187700  | H | 7.96067200  | -3.38004300 | 1.77467600  |
| H | -8.10105200 | 2.56212500  | -0.60329600 | N | -3.10120700 | -0.11225000 | 0.08864700  |
| H | -5.30890400 | 3.64694500  | 2.47118000  | C | -4.25494900 | 0.38882900  | 0.39919400  |
| H | -7.57407200 | 3.82135900  | 1.46947000  | O | -2.18540200 | 0.88089100  | -0.24592300 |
| H | -1.44129200 | -3.70637100 | 0.43423500  | N | -4.54961700 | 1.73563500  | 0.30504200  |

**Trans-U-M8-M8**

|   |             |             |             |   |             |             |            |
|---|-------------|-------------|-------------|---|-------------|-------------|------------|
| U | -0.00863400 | 0.66363700  | -0.46089100 | C | -6.67983400 | -0.18994500 | 0.65751200 |
| O | 0.02481400  | 2.32379800  | -1.13389900 | C | -5.01620900 | -1.79222300 | 1.36008500 |
| O | -0.04215800 | -0.99010900 | 0.20090800  | C | -7.68872900 | -1.06611500 | 1.05119200 |
| O | 0.52169600  | 1.47773000  | 1.86704800  | H | -6.93717500 | 0.76019900  | 0.20415300 |
| H | 0.92279500  | 0.77837700  | 2.39769300  | C | -6.02581100 | -2.66513100 | 1.74641800 |
| O | -0.45850900 | -0.28561000 | -2.74836400 | H | -3.97385600 | -2.05894300 | 1.47781400 |

|   |             |             |             |
|---|-------------|-------------|-------------|
| C | -7.36607500 | -2.30537800 | 1.59747600  |
| H | -8.72730500 | -0.78184400 | 0.92254200  |
| H | -5.76773100 | -3.62801700 | 2.17343400  |
| H | -8.15130800 | -2.98686300 | 1.90523600  |
| H | -0.84911900 | 0.32285400  | -3.38589200 |

**Cis-U-M8-M9**

|   |             |             |             |
|---|-------------|-------------|-------------|
| U | -1.26847700 | -0.43648400 | -0.30249400 |
| O | -0.96798600 | -0.87448400 | 1.40011700  |
| O | -1.70752300 | -0.13731600 | -2.01004500 |
| O | -3.72864400 | -1.34309100 | -0.14217800 |
| H | -4.13758200 | -0.79898700 | -0.82816500 |
| O | -1.40737500 | -2.97242600 | -0.74569400 |
| C | -0.45019000 | -3.94048500 | -0.24629300 |
| C | -0.79267700 | -4.40990600 | 1.15668900  |
| H | 0.50613000  | -3.41832200 | -0.26608300 |
| H | -0.40739100 | -4.77389200 | -0.95479300 |
| H | -0.03601300 | -5.11686000 | 1.50853200  |
| H | -0.82178000 | -3.56253800 | 1.84375100  |
| H | -1.76035800 | -4.92331200 | 1.18111500  |
| C | -4.47099300 | -1.15508300 | 1.09628600  |
| C | -5.92409100 | -1.56401700 | 0.93687800  |
| H | -4.36545700 | -0.11367200 | 1.40711300  |
| H | -3.95598200 | -1.78081700 | 1.82493700  |
| H | -6.44783900 | -1.45768500 | 1.89088900  |
| H | -6.43727000 | -0.93041700 | 0.20666900  |
| H | -6.00826200 | -2.60379000 | 0.61191100  |
| O | 0.84632300  | -0.67143900 | -0.85285600 |
| N | 1.94675700  | -1.14495200 | -0.15582300 |
| C | 3.05809300  | -0.71469700 | -0.66270600 |
| N | 3.10724000  | 0.18788000  | -1.71473300 |
| C | 4.33113500  | -1.15635400 | -0.04855300 |
| H | 2.20647100  | 0.25588700  | -2.17513200 |
| H | 3.88378200  | 0.06669600  | -2.34875300 |
| C | 5.51017400  | -0.42126900 | -0.23070000 |
| C | 4.37888500  | -2.32186300 | 0.73041400  |
| C | 6.70762700  | -0.84637700 | 0.34074000  |
| H | 5.48663600  | 0.50307000  | -0.79554100 |
| C | 5.57319200  | -2.74024700 | 1.30217600  |
| H | 3.46620900  | -2.88351400 | 0.87896100  |
| C | 6.74510800  | -2.00760600 | 1.10667200  |
| H | 7.60930800  | -0.26220700 | 0.19354500  |
| H | 5.59345200  | -3.64436000 | 1.90077800  |
| H | 7.67689000  | -2.33865400 | 1.55138000  |

|   |             |             |             |
|---|-------------|-------------|-------------|
| N | -1.43556600 | 1.89528600  | 0.21634900  |
| C | -1.34704600 | 3.17402600  | 0.39133700  |
| O | -2.67158100 | 1.31958300  | 0.31548000  |
| N | -2.46072600 | 3.90384900  | 0.74718800  |
| C | -0.03745900 | 3.84728400  | 0.27823400  |
| H | -2.50748600 | 4.84419200  | 0.38523100  |
| H | -3.31227800 | 3.36478800  | 0.65062400  |
| C | 0.16164000  | 5.11151200  | 0.85076500  |
| C | 1.03152300  | 3.23329200  | -0.39059800 |
| C | 1.39449900  | 5.75008000  | 0.74444600  |
| H | -0.63741800 | 5.58234300  | 1.41106800  |
| C | 2.26265300  | 3.86822900  | -0.48406400 |
| H | 0.90028800  | 2.25253200  | -0.82755100 |
| C | 2.44834900  | 5.13247300  | 0.07640500  |
| H | 1.53337500  | 6.72561200  | 1.19691500  |
| H | 3.07598900  | 3.36522400  | -0.99409700 |
| H | 3.40955800  | 5.62814100  | -0.00074900 |
| H | -2.30527600 | -3.31797800 | -0.68128200 |

**Trans-U-M8-M9**

|   |             |             |             |
|---|-------------|-------------|-------------|
| U | -0.35040400 | 0.78804400  | 0.31787300  |
| O | 0.03689600  | 0.63002000  | -1.41484900 |
| O | -0.71421800 | 1.03359200  | 2.05054400  |
| O | 0.20850400  | 3.27072700  | 0.24172800  |
| H | -0.33993200 | 3.68536200  | 0.91932600  |
| O | -0.74934000 | -1.73183100 | 0.33370400  |
| C | 0.11970700  | -2.67079700 | -0.35565000 |
| C | 0.10002600  | -4.02872900 | 0.32310400  |
| H | 1.11067300  | -2.21887400 | -0.32467300 |
| H | -0.19328200 | -2.73493900 | -1.40233700 |
| H | 0.78713500  | -4.70974800 | -0.18731200 |
| H | 0.41408600  | -3.94092600 | 1.36533600  |
| H | -0.89805800 | -4.47748200 | 0.29660200  |
| C | 0.09793900  | 4.03416400  | -0.98958100 |
| C | 0.57333200  | 5.46233200  | -0.79422800 |
| H | -0.93689600 | 3.98740000  | -1.33787700 |
| H | 0.72130100  | 3.49707900  | -1.70314600 |
| H | 0.52371100  | 6.00502300  | -1.74231700 |
| H | -0.05440400 | 5.99683400  | -0.07398900 |
| H | 1.60517300  | 5.48324900  | -0.43713900 |
| O | 1.69407500  | 0.19279000  | 0.86406400  |
| N | 2.68416100  | -0.39207300 | 0.08848200  |
| C | 3.84204700  | -0.34232300 | 0.66863600  |
| N | 4.03003400  | 0.14757200  | 1.94688400  |

|   |             |             |             |
|---|-------------|-------------|-------------|
| C | 5.00825100  | -0.90353000 | -0.05090000 |
| H | 3.19942500  | 0.60815200  | 2.29812600  |
| H | 4.89345400  | 0.64366400  | 2.10903000  |
| C | 6.13458900  | -1.35426000 | 0.65059900  |
| C | 5.00226000  | -0.99324700 | -1.45063100 |
| C | 7.23058900  | -1.87824100 | -0.03112700 |
| H | 6.13877200  | -1.31977300 | 1.73376000  |
| C | 6.09532400  | -1.52177900 | -2.12609200 |
| H | 4.13152500  | -0.64100100 | -1.98847900 |
| C | 7.21582000  | -1.96347200 | -1.42066400 |
| H | 8.09257600  | -2.22802500 | 0.52631600  |
| H | 6.07832300  | -1.58274100 | -3.20879600 |
| H | 8.06935200  | -2.37041400 | -1.95140200 |
| N | -2.75495100 | 0.64129300  | -0.10791400 |
| C | -3.96182800 | 0.36870600  | -0.48240900 |
| O | -2.32512900 | 1.92280000  | -0.23993800 |
| N | -4.75637100 | 1.31760000  | -1.09250800 |
| C | -4.47061600 | -1.00741400 | -0.32012300 |
| H | -5.74071800 | 1.28097900  | -0.87226900 |
| H | -4.34394600 | 2.24130300  | -1.04596400 |
| C | -5.33866200 | -1.56358100 | -1.26972300 |
| C | -4.09728400 | -1.77804800 | 0.79282000  |
| C | -5.80419200 | -2.86700200 | -1.12075800 |
| H | -5.62446100 | -0.97729400 | -2.13506900 |
| C | -4.56029700 | -3.08380100 | 0.93234700  |
| H | -3.47600200 | -1.33083900 | 1.56043300  |
| C | -5.41351800 | -3.63340700 | -0.02437200 |
| H | -6.46704100 | -3.28816200 | -1.86829000 |
| H | -4.27082200 | -3.66510300 | 1.80065500  |
| H | -5.77851500 | -4.64766100 | 0.08950500  |
| H | -1.67162400 | -1.99509800 | 0.22157100  |

**Cis-U-M9-NO3-1**

|   |             |             |             |
|---|-------------|-------------|-------------|
| U | 0.71861100  | -0.02888200 | -0.00686400 |
| O | 0.79484400  | -0.28573700 | 1.74844100  |
| O | 1.29325400  | -2.46005100 | -0.34425000 |
| O | -0.80819100 | -1.98141900 | -0.24304900 |
| O | -0.18578400 | -4.05818900 | -0.50318800 |
| N | 0.08432000  | -2.89411900 | -0.37103300 |
| O | 0.77456100  | 0.20720700  | -1.76346600 |
| O | 3.28038600  | -0.38599300 | -0.02744100 |
| H | 3.66160800  | 0.15438400  | 0.67471800  |
| O | 2.24099500  | 2.07663300  | 0.41999200  |
| H | 1.54554900  | 2.56954100  | 0.88044200  |

|   |             |             |             |
|---|-------------|-------------|-------------|
| C | 2.70237300  | 2.87550400  | -0.70081700 |
| C | 3.41526400  | 4.13123200  | -0.23028000 |
| H | 1.84926300  | 3.11088700  | -1.34233700 |
| H | 3.37354000  | 2.21945700  | -1.25487100 |
| H | 3.79380500  | 4.69081400  | -1.09025500 |
| H | 2.73753700  | 4.78898100  | 0.32207100  |
| H | 4.25866000  | 3.88320400  | 0.41832100  |
| C | 4.13377400  | -1.52579700 | -0.30470700 |
| C | 4.36891000  | -2.37829400 | 0.92859400  |
| H | 5.07252700  | -1.14964100 | -0.72406600 |
| H | 3.60867000  | -2.08799000 | -1.07371300 |
| H | 5.01432200  | -3.22444300 | 0.67605500  |
| H | 4.86351700  | -1.80781500 | 1.72167800  |
| H | 3.42326200  | -2.76713600 | 1.30773200  |
| O | -0.38330100 | 1.96597200  | 0.31250200  |
| N | -1.41147100 | 1.06584700  | 0.19818500  |
| C | -2.61685000 | 1.53857600  | 0.24045700  |
| N | -2.82931900 | 2.89217300  | 0.32489900  |
| C | -3.78085300 | 0.63475800  | 0.13847600  |
| H | -3.66309700 | 3.19180800  | 0.80525200  |
| H | -1.98940500 | 3.41838600  | 0.52337000  |
| C | -4.99645900 | 1.11348900  | -0.37136900 |
| C | -3.69079500 | -0.70308200 | 0.54490700  |
| C | -6.10082000 | 0.27231300  | -0.46591400 |
| H | -5.06716600 | 2.13532700  | -0.72528000 |
| C | -4.79559900 | -1.53985000 | 0.44124100  |
| H | -2.75620400 | -1.08541000 | 0.93065000  |
| C | -6.00412500 | -1.05608300 | -0.05851700 |
| H | -7.03261900 | 0.65243800  | -0.86916300 |
| H | -4.71017700 | -2.57435500 | 0.75279200  |
| H | -6.86353100 | -1.71256000 | -0.13502300 |

**Cis-U-M9-NO3-2**

|   |             |             |             |
|---|-------------|-------------|-------------|
| U | 0.86856600  | -0.27053000 | -0.03547600 |
| O | 0.84023100  | -0.38040200 | 1.73801100  |
| O | 3.36817100  | -0.32553100 | -0.01746200 |
| O | 2.40410400  | -2.23385500 | -0.27726400 |
| O | 4.58569800  | -2.12451900 | -0.25065000 |
| N | 3.50606600  | -1.59741700 | -0.18696600 |
| O | 0.91989200  | 0.05892000  | -1.78102200 |
| O | 1.96093200  | 2.05460100  | 0.43194900  |
| H | 1.80783600  | 2.29926800  | 1.35184300  |
| O | -0.84363300 | 1.68621500  | 0.19734500  |
| H | -1.71157600 | 1.27713300  | 0.31447700  |

|   |             |             |             |
|---|-------------|-------------|-------------|
| C | -0.97064700 | 2.82068200  | -0.69055500 |
| C | -1.83569900 | 3.91019000  | -0.07969600 |
| H | -1.36706400 | 2.48437700  | -1.65368000 |
| H | 0.04940900  | 3.16540600  | -0.84807100 |
| H | -1.88237600 | 4.77231300  | -0.75129300 |
| H | -2.85790800 | 3.55917000  | 0.08760500  |
| H | -1.42486300 | 4.23991700  | 0.87722900  |
| C | 3.20862300  | 2.64459200  | -0.02322200 |
| C | 4.30564100  | 2.53792100  | 1.01908100  |
| H | 3.00899600  | 3.68734300  | -0.29215900 |
| H | 3.46981100  | 2.09319400  | -0.92450000 |
| H | 5.21997200  | 3.00368800  | 0.64086200  |
| H | 4.02939100  | 3.05947900  | 1.94230900  |
| H | 4.51498100  | 1.49206100  | 1.24273400  |
| O | -0.35269600 | -2.16478400 | -0.23486300 |
| N | -1.36738600 | -1.25537400 | -0.20028700 |
| C | -2.55417900 | -1.72839500 | 0.02016000  |
| N | -2.75241700 | -3.05555400 | 0.29637200  |
| C | -3.70760800 | -0.80525400 | 0.03393300  |
| H | -3.62038700 | -3.46878400 | -0.00676700 |
| H | -1.92061900 | -3.61977800 | 0.17335100  |
| C | -4.73698500 | -0.96513700 | 0.97212300  |
| C | -3.79301400 | 0.23648000  | -0.90179700 |
| C | -5.81735400 | -0.08838800 | 0.98571300  |
| H | -4.67225500 | -1.76411000 | 1.70127800  |
| C | -4.87713800 | 1.11095100  | -0.88306300 |
| H | -3.02559700 | 0.32358600  | -1.66197100 |
| C | -5.89010200 | 0.95303900  | 0.06169100  |
| H | -6.60215900 | -0.21512900 | 1.72269600  |
| H | -4.94221400 | 1.90226100  | -1.62146700 |
| H | -6.73615400 | 1.63049000  | 0.07089400  |

**Trans-U-M9-NO3**

|   |             |             |             |
|---|-------------|-------------|-------------|
| U | 0.84203800  | 0.03505500  | -0.13348900 |
| O | 0.80947800  | -0.03051500 | -1.90213800 |
| O | 1.75692500  | 2.38191000  | -0.26938900 |
| O | 2.48707100  | -1.90835700 | -0.02072800 |
| O | 3.22826400  | 0.80943300  | -0.20316200 |
| N | 3.00129800  | 2.07072900  | -0.25345300 |
| O | 3.87968100  | 2.89167300  | -0.28272200 |
| O | 0.89572600  | 0.17019700  | 1.63596700  |
| O | -1.04784500 | 1.76316400  | -0.08329800 |
| H | 1.91239000  | -2.68034300 | 0.06082500  |
| H | -1.90751600 | 1.32980300  | -0.00997300 |

|   |             |             |             |
|---|-------------|-------------|-------------|
| C | -1.11999100 | 3.09063400  | 0.49847700  |
| C | -1.43855700 | 3.04540900  | 1.98303600  |
| H | -1.87001600 | 3.66048000  | -0.05890000 |
| H | -0.14356900 | 3.53124700  | 0.31182300  |
| H | -1.44844100 | 4.06037800  | 2.39090800  |
| H | -2.42151600 | 2.60131800  | 2.16884600  |
| H | -0.68735600 | 2.46302500  | 2.51963300  |
| C | 3.69830100  | -2.09278300 | 0.74879600  |
| C | 4.51942100  | -3.24994400 | 0.20696000  |
| H | 3.43407400  | -2.24266800 | 1.80075300  |
| H | 4.23250800  | -1.14934000 | 0.65960100  |
| H | 5.44924100  | -3.34684100 | 0.77458000  |
| H | 3.97895700  | -4.19841800 | 0.28829600  |
| H | 4.77068100  | -3.08370700 | -0.84254400 |
| O | -0.13585600 | -2.05912000 | 0.02898400  |
| N | -1.23052900 | -1.26040200 | -0.09837700 |
| C | -2.39092700 | -1.80737600 | 0.06794200  |
| N | -2.51646400 | -3.11816800 | 0.46065300  |
| C | -3.60610900 | -0.98466400 | -0.10518500 |
| H | -3.31921400 | -3.62084000 | 0.11402300  |
| H | -1.64060700 | -3.62387300 | 0.43515500  |
| C | -4.71742700 | -1.17343600 | 0.72783400  |
| C | -3.66556400 | -0.01027200 | -1.11374200 |
| C | -5.85689700 | -0.39078900 | 0.56647900  |
| H | -4.67337500 | -1.91789300 | 1.51403800  |
| C | -4.80633400 | 0.77410200  | -1.26510100 |
| H | -2.82924200 | 0.10019900  | -1.79414400 |
| C | -5.90380400 | 0.58711300  | -0.42573900 |
| H | -6.70706100 | -0.53931100 | 1.22246100  |
| H | -4.84451600 | 1.51770500  | -2.05299000 |
| H | -6.79330300 | 1.19387300  | -0.54985300 |

**U-M11-M6**

|   |             |             |             |
|---|-------------|-------------|-------------|
| U | -0.09493200 | 0.20688900  | 0.25990300  |
| O | 0.95570500  | 0.07714400  | -1.17925900 |
| O | 0.40233300  | -2.13140600 | 0.70882400  |
| O | 2.47519000  | -2.79138800 | 0.43673700  |
| O | 0.83302000  | -4.07754000 | -0.14378900 |
| N | 1.24047000  | -3.02389500 | 0.30985700  |
| O | -1.12688400 | 0.35664100  | 1.71108600  |
| O | -0.99575400 | 2.43311800  | -0.66673700 |
| O | 0.77053600  | 2.62503600  | 0.55058500  |
| O | -0.05454800 | 4.39045100  | -0.43865100 |
| O | -1.89936300 | -0.45374400 | -0.80221500 |

|   |             |             |             |
|---|-------------|-------------|-------------|
| N | -0.09806900 | 3.20199200  | -0.19958600 |
| O | 1.88448900  | 0.32998600  | 1.58083500  |
| N | 3.00340400  | -0.16811600 | 1.04553600  |
| C | 3.91054600  | 0.62440900  | 0.54538200  |
| N | 3.73829200  | 1.96568300  | 0.65461800  |
| C | 5.12796300  | 0.06791200  | -0.07631200 |
| H | 4.18855800  | 2.52780500  | -0.05017000 |
| H | 2.79438100  | 2.25964100  | 0.90475300  |
| C | 6.33467700  | 0.77752400  | 0.00394200  |
| C | 5.09459700  | -1.15575700 | -0.76124900 |
| C | 7.48811600  | 0.27301000  | -0.58767900 |
| C | 6.25453000  | -1.65533900 | -1.34386700 |
| H | 4.16878800  | -1.71277900 | -0.84233200 |
| C | 7.45128300  | -0.94502200 | -1.26315200 |
| H | 6.21661800  | -2.60118800 | -1.87184500 |
| H | 8.35022200  | -1.33876500 | -1.72455500 |
| N | -3.17024000 | -0.62785800 | -0.29457300 |
| C | -4.21183500 | -0.38189000 | -1.18282200 |
| N | -4.09293100 | -0.18344000 | -2.44071000 |
| C | -5.56650800 | -0.43413300 | -0.55241100 |
| C | -6.63185400 | 0.21085400  | -1.19226700 |
| C | -5.81106600 | -1.11638800 | 0.64585600  |
| C | -7.90653600 | 0.18932600  | -0.63857500 |
| C | -7.08967200 | -1.13458500 | 1.20079100  |
| H | -5.00453200 | -1.65493900 | 1.12884800  |
| C | -8.14064900 | -0.48027400 | 0.56351800  |
| H | -7.26383300 | -1.67003400 | 2.12820700  |
| H | -9.13566300 | -0.49516800 | 0.99617400  |
| H | 8.41666700  | 0.82819300  | -0.51392700 |
| H | 6.37045300  | 1.71198600  | 0.55182200  |
| H | -6.42681400 | 0.71512900  | -2.12818100 |
| H | -8.72152600 | 0.69766300  | -1.14366200 |
| H | 3.01006000  | -1.20062500 | 0.94036800  |
| H | -3.25921900 | -0.20543200 | 0.62642200  |
| H | -3.09619900 | -0.15012600 | -2.66524900 |

**U-M12-M6**

|   |             |             |             |
|---|-------------|-------------|-------------|
| U | 0.37615300  | 0.48101400  | -0.17183400 |
| O | -0.78263800 | 0.39887100  | 1.18434300  |
| O | 0.23992100  | -1.95319700 | -0.42236300 |
| O | -1.74436900 | -2.85087000 | -0.17138500 |
| O | 0.02845800  | -3.90952900 | 0.48330500  |
| N | -0.49640200 | -2.92723200 | -0.01379900 |
| O | 1.50569300  | 0.57340200  | -1.53973100 |

|   |             |             |             |
|---|-------------|-------------|-------------|
| O | 0.94671500  | 2.88503300  | 0.53464000  |
| O | -0.72294800 | 2.72107300  | -0.81732200 |
| O | -0.17664300 | 4.67678200  | -0.00958300 |
| O | 3.53947100  | 0.57179700  | 3.61833900  |
| N | 0.01389500  | 3.48173500  | -0.08886100 |
| O | -1.49017800 | 0.18408600  | -1.63838400 |
| N | -2.57411200 | -0.38758800 | -1.10595000 |
| C | -3.59831000 | 0.33333600  | -0.74201300 |
| N | -3.58267500 | 1.66598500  | -0.99727600 |
| C | -4.77178600 | -0.30172000 | -0.11249800 |
| H | -4.13355700 | 2.23979000  | -0.37844600 |
| H | -2.66752100 | 2.04669000  | -1.23670700 |
| C | -6.04995000 | 0.23355400  | -0.32602600 |
| C | -4.62645900 | -1.42540800 | 0.71453400  |
| C | -7.16379200 | -0.34446200 | 0.27411700  |
| C | -5.74685400 | -2.00088500 | 1.30432200  |
| H | -3.64451000 | -1.84333700 | 0.90223900  |
| C | -7.01526300 | -1.46349100 | 1.09082700  |
| H | -5.62276100 | -2.86765700 | 1.94315900  |
| H | -7.88322800 | -1.91418300 | 1.55936300  |
| N | 4.07831000  | 0.12461600  | 2.52631000  |
| C | 3.41856300  | -0.11955500 | 1.39339700  |
| N | 2.08599800  | 0.07013100  | 1.35622800  |
| C | 4.20374100  | -0.67687100 | 0.27441700  |
| C | 3.69768700  | -1.74007400 | -0.48948900 |
| C | 5.48132500  | -0.17849700 | -0.02701200 |
| C | 4.46240900  | -2.29798600 | -1.50743000 |
| C | 6.24559400  | -0.74768200 | -1.04250400 |
| H | 5.85897700  | 0.68352700  | 0.51199200  |
| C | 5.74012500  | -1.81123300 | -1.78633100 |
| H | 7.22743000  | -0.34341300 | -1.26699000 |
| H | 6.32970100  | -2.24811800 | -2.58557300 |
| H | -8.14787200 | 0.07538500  | 0.09751200  |
| H | -6.16882100 | 1.08820600  | -0.98185700 |
| H | 2.70859800  | -2.12700500 | -0.27687200 |
| H | 4.05502400  | -3.11923900 | -2.08717500 |
| H | -2.46758500 | -1.39331100 | -0.88341200 |
| H | 5.06325200  | -0.14234400 | 2.55303400  |
| H | 1.80171100  | 0.28450400  | 2.31720500  |

**U-M11-M11**

|   |             |             |             |
|---|-------------|-------------|-------------|
| U | -0.01775800 | 1.12868400  | -0.05642200 |
| O | -0.75009500 | 1.29197800  | -1.67754800 |
| N | 2.96402800  | -0.12652400 | -0.36474600 |

|   |             |             |             |
|---|-------------|-------------|-------------|
| O | -0.89544500 | 3.49379400  | 0.60556600  |
| C | 4.13334800  | -0.36907400 | -1.00380900 |
| O | 1.92837200  | 0.50830900  | -0.98384600 |
| O | 1.04809000  | 3.48026100  | -0.33548200 |
| N | 0.10902500  | 4.15748100  | 0.19289700  |
| O | 0.16849000  | 5.37539900  | 0.29759400  |
| O | 0.73907600  | 1.00046800  | 1.55797000  |
| N | -2.96420500 | -0.16188600 | 0.22068600  |
| O | -0.43298600 | -1.37045000 | -0.20405500 |
| C | -4.24311200 | -0.18284400 | 0.71508300  |
| O | -2.07031800 | 0.67252300  | 0.85222000  |
| O | 1.28874300  | -2.28813200 | 0.78696400  |
| N | 0.15902600  | -2.40905800 | 0.26939200  |
| O | -0.41220200 | -3.49912100 | 0.19549200  |
| N | -4.73192600 | 0.63940100  | 1.57939900  |
| H | -3.96446300 | 1.24862500  | 1.87379700  |
| C | -5.12721300 | -1.23246300 | 0.11739600  |
| C | -6.33538200 | -1.53585500 | 0.75913400  |
| C | -4.80980600 | -1.91270000 | -1.06577200 |
| C | -7.19317000 | -2.50181800 | 0.24481400  |
| C | -5.66805300 | -2.88458700 | -1.57750000 |
| H | -3.89708300 | -1.66982300 | -1.59588800 |
| C | -6.86242000 | -3.18564100 | -0.92627400 |
| H | -5.40070200 | -3.40330000 | -2.49275300 |
| H | -7.52956900 | -3.94281200 | -1.32767100 |
| N | 4.48327300  | 0.19603200  | -2.11796700 |
| H | 5.39639600  | -0.16914200 | -2.38306400 |
| C | 5.02134500  | -1.32667300 | -0.24874800 |
| C | 6.39659400  | -1.06660000 | -0.16504500 |
| C | 4.53043000  | -2.50645300 | 0.32987100  |
| C | 7.25882400  | -1.95182800 | 0.47433400  |
| C | 5.39732400  | -3.39477100 | 0.96546200  |
| H | 3.47051200  | -2.73381700 | 0.28752900  |
| C | 6.76214100  | -3.12556400 | 1.04124700  |
| H | 4.99641600  | -4.30339300 | 1.40337900  |
| H | 7.43172400  | -3.81917500 | 1.54099400  |
| H | -8.12383600 | -2.72489800 | 0.75903900  |
| H | -6.56965400 | -0.98098000 | 1.65928600  |
| H | 6.77893900  | -0.14794700 | -0.59698000 |
| H | 8.31854600  | -1.72188600 | 0.53732700  |
| H | 2.65561200  | -0.75077000 | 0.37281100  |
| H | -2.52257300 | -1.04678500 | -0.02477800 |

### U-M11-M8

|   |             |             |             |
|---|-------------|-------------|-------------|
| U | -0.10938300 | 0.39912300  | -0.05490100 |
| O | -0.87633600 | 0.37968500  | -1.66796800 |
| N | 3.11817100  | 0.28520100  | -0.38554700 |
| O | -1.60849900 | 2.46209000  | 0.61542300  |
| C | 4.29136200  | 0.46160600  | -1.03876200 |
| O | 1.92076400  | 0.52168300  | -0.99581300 |
| O | 0.26568200  | 2.99894400  | -0.30375600 |
| N | -0.81843700 | 3.38504700  | 0.22247800  |
| O | -1.10265000 | 4.56975700  | 0.34970100  |
| O | 0.63824000  | 0.49274000  | 1.56534500  |
| N | -3.16767600 | -0.95028700 | 0.39301100  |
| O | 0.42368400  | -2.03098900 | -0.21827900 |
| C | -4.21121100 | -0.21580800 | 0.63001600  |
| O | -2.01156100 | -0.44359300 | 0.86705100  |
| O | 2.33240700  | -2.25268600 | 0.83440600  |
| N | 1.38427900  | -2.76922200 | 0.19550500  |
| O | 1.35238800  | -3.97853800 | -0.04147200 |
| N | -4.17649700 | 0.97879900  | 1.36747400  |
| H | -3.20526700 | 1.23494800  | 1.52936600  |
| H | -4.63156100 | 1.74186900  | 0.87825000  |
| C | -5.51757300 | -0.70963600 | 0.16363200  |
| C | -6.71545200 | -0.14405800 | 0.63292600  |
| C | -5.60538700 | -1.75885200 | -0.77188400 |
| C | -7.95212300 | -0.60397800 | 0.18194900  |
| C | -6.83850900 | -2.21645700 | -1.21256600 |
| H | -4.68100200 | -2.19155100 | -1.13263300 |
| C | -8.02512400 | -1.64128800 | -0.74354600 |
| H | -6.87905200 | -3.02511000 | -1.93655400 |
| H | -8.98757600 | -1.99759800 | -1.09821500 |
| N | 4.41098000  | 1.11177600  | -2.15546700 |
| H | 5.39065500  | 1.08327400  | -2.43253600 |
| C | 5.46709200  | -0.13058000 | -0.30060500 |
| C | 6.67327000  | 0.58292200  | -0.25007400 |
| C | 5.42098300  | -1.40281200 | 0.28921900  |
| C | 7.80135500  | 0.04840900  | 0.36441500  |
| C | 6.55485400  | -1.93853600 | 0.89927700  |
| H | 4.49976300  | -1.97649100 | 0.27915400  |
| C | 7.74855900  | -1.22124000 | 0.93975900  |
| H | 6.49812200  | -2.92666100 | 1.34495700  |
| H | 8.62704000  | -1.64316700 | 1.41902500  |
| H | -8.86287300 | -0.15001600 | 0.56290900  |
| H | -6.66432800 | 0.64375300  | 1.37505000  |

|   |            |             |             |
|---|------------|-------------|-------------|
| H | 6.70918100 | 1.57394000  | -0.68975200 |
| H | 8.72070300 | 0.62592200  | 0.40084200  |
| H | 3.04819200 | -0.41252400 | 0.34920900  |

**U-M12-M12**

|   |             |             |             |
|---|-------------|-------------|-------------|
| U | 0.08980500  | -0.10118700 | 0.07025900  |
| O | 0.17622800  | -0.24798600 | 1.82862400  |
| N | 3.54824800  | 1.51395600  | 1.74615200  |
| O | -0.16981800 | -2.68247900 | -0.41342400 |
| C | 3.47666100  | 0.98595000  | 0.51870500  |
| O | 2.59848200  | 1.98852100  | 2.47341200  |
| O | 1.86447600  | -2.00404800 | -0.21406100 |
| N | 1.05960400  | -2.96380000 | -0.47741300 |
| O | 1.46957200  | -4.07867200 | -0.77616000 |
| O | 0.10383400  | 0.03030900  | -1.71151700 |
| N | -3.41481400 | -1.59305800 | 1.51072600  |
| O | -0.67768800 | 2.22071000  | 0.18244200  |
| C | -3.43003000 | -0.77333900 | 0.45200200  |
| O | -2.38295600 | -2.10297200 | 2.09529100  |
| O | -2.16297600 | 2.44123800  | -1.41478100 |
| N | -1.42491100 | 2.96676800  | -0.55502100 |
| O | -1.39607700 | 4.18660000  | -0.37780700 |
| N | -2.30768700 | -0.35606900 | -0.14196200 |
| C | -4.78244300 | -0.34314700 | 0.02277300  |
| C | -4.97410200 | 0.92968800  | -0.55121100 |
| C | -5.90951200 | -1.18377800 | 0.13655500  |
| C | -6.23942800 | 1.34736200  | -0.94920400 |
| C | -7.17448300 | -0.75350300 | -0.25117800 |
| H | -5.78389100 | -2.19972700 | 0.49426600  |
| C | -7.35240900 | 0.51873300  | -0.79543200 |
| H | -8.02134200 | -1.42743100 | -0.15357900 |
| H | -8.33678700 | 0.85065000  | -1.11141400 |
| N | 2.32417200  | 0.84321200  | -0.15604200 |
| C | 4.77842000  | 0.52858300  | -0.02448800 |
| C | 4.85335700  | -0.67711500 | -0.74989900 |
| C | 5.96099100  | 1.27797400  | 0.13401600  |
| C | 6.06612800  | -1.11765300 | -1.26716200 |
| C | 7.17383700  | 0.82514500  | -0.37915300 |
| H | 5.91568900  | 2.24051900  | 0.63212700  |
| C | 7.23623200  | -0.37531300 | -1.08550200 |
| H | 8.06953300  | 1.42626800  | -0.24775000 |
| H | 8.17914200  | -0.72359700 | -1.49623600 |
| H | -6.35400800 | 2.33607900  | -1.38316800 |
| H | -4.12254000 | 1.58801600  | -0.68715100 |

|   |             |             |             |
|---|-------------|-------------|-------------|
| H | 3.95635500  | -1.27779500 | -0.85911300 |
| H | 6.09979100  | -2.05839800 | -1.80842200 |
| H | -2.52326200 | 0.18295300  | -0.97520200 |
| H | 2.53577100  | 0.66080400  | -1.13157600 |
| H | -4.32351300 | -1.73991100 | 1.95447200  |
| H | 4.47083200  | 1.42640600  | 2.18274700  |

**U-M12-M8**

|   |             |             |             |
|---|-------------|-------------|-------------|
| U | 0.06873800  | 0.75004200  | -0.36803600 |
| O | -0.45534300 | 0.72715200  | 1.32695300  |
| N | -3.29150000 | 0.28904700  | -0.43928200 |
| O | 1.18236600  | 3.09782300  | -0.22298000 |
| C | -3.74344200 | -0.90175500 | -0.18667700 |
| O | -2.05597300 | 0.31632900  | -0.97681900 |
| O | -0.92853000 | 3.11470500  | -0.66736900 |
| N | 0.14516400  | 3.77912300  | -0.49099300 |
| O | 0.17063600  | 5.00003000  | -0.57791400 |
| O | 0.55411600  | 0.77108600  | -2.08642700 |
| N | 3.31705700  | 0.66126100  | 2.12714700  |
| O | -0.06056500 | -1.76973700 | -0.45256500 |
| C | 3.36846100  | 0.04030300  | 0.94217400  |
| O | 2.37080400  | 1.40928300  | 2.58632400  |
| O | 1.68414900  | -2.47192600 | -1.57438400 |
| N | 0.62071100  | -2.72742400 | -0.98255400 |
| O | 0.18203200  | -3.87939100 | -0.88080500 |
| N | 2.37893900  | 0.11852600  | 0.04524300  |
| C | 4.59379300  | -0.76719700 | 0.72775100  |
| C | 4.53684100  | -1.96499000 | -0.01223300 |
| C | 5.85121800  | -0.36298500 | 1.22233900  |
| C | 5.67903000  | -2.73370000 | -0.20866100 |
| C | 6.98704300  | -1.14396200 | 1.03220800  |
| H | 5.94378900  | 0.59361900  | 1.72467500  |
| C | 6.91104600  | -2.33904400 | 0.31670000  |
| H | 7.94223800  | -0.80242700 | 1.42178800  |
| H | 7.79918300  | -2.94268100 | 0.15594900  |
| N | -3.06332600 | -2.08545100 | -0.48193000 |
| C | -5.11071100 | -0.99980400 | 0.35650700  |
| C | -5.80847900 | -2.21980900 | 0.35029300  |
| C | -5.75946600 | 0.12660800  | 0.89860600  |
| C | -7.09935800 | -2.31274700 | 0.86959400  |
| C | -7.04575100 | 0.03007000  | 1.40897500  |
| H | -5.22007100 | 1.06512400  | 0.90153500  |
| C | -7.72845400 | -1.19182500 | 1.40377200  |
| H | -7.52215700 | 0.91364200  | 1.82415500  |



|   |             |             |             |
|---|-------------|-------------|-------------|
| H | -8.73223500 | -1.26402000 | 1.81167100  |
| H | 5.60141400  | -3.65505600 | -0.77796800 |
| H | 3.58912500  | -2.28993000 | -0.42871100 |
| H | -5.33759100 | -3.08921900 | -0.09285800 |
| H | -7.61605300 | -3.26840100 | 0.84909300  |
| H | 2.65727800  | -0.33468000 | -0.81917400 |
| H | -3.11349000 | -2.76778600 | 0.26487300  |
| H | -2.08389500 | -1.91079800 | -0.70569500 |
| H | 4.07906400  | 0.42536400  | 2.76637900  |

### U-M14-M6

|   |             |             |             |
|---|-------------|-------------|-------------|
| U | -0.04120900 | 0.58964700  | 0.34770500  |
| O | 0.80873600  | -0.02022300 | -1.09275700 |
| O | 0.16965700  | -1.64291200 | 1.17291100  |
| O | 2.05293600  | -2.71614800 | 0.88417700  |
| O | 0.19720500  | -3.56032000 | 0.14769400  |
| N | 0.80893700  | -2.67181300 | 0.70611000  |
| O | -0.85493300 | 1.20124000  | 1.79118100  |
| O | -0.72648700 | 2.62839700  | -1.02037000 |
| O | 1.16908100  | 2.80366000  | -0.01427300 |
| O | 0.49537900  | 4.41113300  | -1.33350700 |
| O | -2.00566500 | -0.21617600 | -0.68109000 |
| N | 0.31309700  | 3.33245600  | -0.81768800 |
| O | 2.02929500  | 0.65537300  | 1.47037800  |
| N | 3.02494700  | -0.12046800 | 1.02324600  |
| C | 4.00959200  | 0.39651700  | 0.33964000  |
| N | 4.04043500  | 1.73746800  | 0.15850800  |
| C | 5.09629300  | -0.45995400 | -0.17536200 |
| H | 4.54877600  | 2.07211500  | -0.64402000 |
| H | 3.17469300  | 2.23012400  | 0.37223600  |
| C | 6.39936500  | 0.05097600  | -0.25905300 |
| C | 4.84256000  | -1.77318500 | -0.59674900 |
| C | 7.43214700  | -0.73753900 | -0.75504900 |
| C | 5.88322300  | -2.55572500 | -1.08624700 |
| H | 3.84064400  | -2.18274200 | -0.54538600 |
| C | 7.17639800  | -2.04271700 | -1.17043800 |
| H | 5.67633400  | -3.56882500 | -1.41088300 |
| H | 7.98134900  | -2.65770500 | -1.55720700 |
| N | -3.40140300 | 0.02067200  | -0.27521800 |
| C | -4.12202800 | -1.06770300 | -0.60071900 |
| N | -3.76561900 | -2.23824500 | -1.07971000 |
| C | -5.59809600 | -0.82877200 | -0.40366700 |
| C | -6.48835800 | -1.88955400 | -0.60130900 |
| C | -6.11056900 | 0.41928900  | -0.02734700 |

|   |             |             |             |
|---|-------------|-------------|-------------|
| C | -7.85819400 | -1.70944400 | -0.42895300 |
| C | -7.48045500 | 0.59586100  | 0.15315300  |
| H | -5.42210600 | 1.24144800  | 0.11825300  |
| C | -8.36173000 | -0.46590600 | -0.04848700 |
| H | -7.86155500 | 1.56865800  | 0.44875200  |
| H | -9.42950800 | -0.32514800 | 0.08945600  |
| H | 8.43725300  | -0.33464300 | -0.80921100 |
| H | 6.60444100  | 1.05671200  | 0.08894200  |
| H | -6.06707800 | -2.84368400 | -0.89248700 |
| H | -8.53541300 | -2.54315500 | -0.58928800 |
| H | 2.88079200  | -1.13709700 | 1.14980700  |
| H | -2.76334300 | -2.39785900 | -0.97469200 |
| H | -2.01932200 | -0.79131100 | -1.47114300 |

### U-M15-M6

|   |             |             |             |
|---|-------------|-------------|-------------|
| U | -0.27744000 | 1.02058000  | 0.42895700  |
| O | 0.31831800  | 0.20816500  | -1.03797500 |
| O | -0.07863400 | -1.19765400 | 1.66030500  |
| O | 1.23439700  | -2.82584200 | 1.06268900  |
| O | -0.91110200 | -3.14657800 | 1.16611000  |
| N | 0.06533900  | -2.41065800 | 1.27812100  |
| O | -0.72985700 | 1.90119600  | 1.89913800  |
| O | -0.31735800 | 3.22522900  | -0.98591400 |
| O | 1.59248200  | 2.88617600  | -0.07170400 |
| O | 1.34763800  | 4.55438500  | -1.46097700 |
| O | -2.38768000 | 1.85858200  | -0.76939500 |
| N | 0.89533500  | 3.59666900  | -0.86419500 |
| O | 1.91471700  | 0.66516200  | 1.35996500  |
| N | 2.63644400  | -0.35746000 | 0.90572700  |
| C | 3.67961700  | -0.14036000 | 0.15088400  |
| N | 4.03879800  | 1.14505600  | -0.10252500 |
| C | 4.49210100  | -1.25949200 | -0.36496000 |
| H | 4.53113400  | 1.30106700  | -0.96793800 |
| H | 3.32472000  | 1.83860300  | 0.12297500  |
| C | 5.87098600  | -1.08257700 | -0.55267500 |
| C | 3.90886600  | -2.49264300 | -0.69141400 |
| C | 6.65231700  | -2.11765700 | -1.05579100 |
| C | 4.69942100  | -3.52402000 | -1.18741400 |
| H | 2.84501900  | -2.64606500 | -0.55805100 |
| C | 6.06864100  | -3.34187100 | -1.37515500 |
| H | 4.23663800  | -4.47223500 | -1.43591600 |
| H | 6.67706400  | -4.14943400 | -1.76743300 |
| N | -3.52779200 | 1.02887000  | -1.10394100 |

|   |             |             |             |
|---|-------------|-------------|-------------|
| C | -3.37668800 | -0.06152800 | -0.39701000 |
| N | -2.30302900 | -0.28536000 | 0.37323400  |
| C | -4.48233800 | -1.05875900 | -0.52620100 |
| C | -4.24639900 | -2.41856000 | -0.28756000 |
| C | -5.77163300 | -0.65413100 | -0.89886200 |
| C | -5.27743300 | -3.34754300 | -0.41276000 |
| C | -6.79754500 | -1.58442700 | -1.02640800 |
| H | -5.94740600 | 0.39779800  | -1.08397900 |
| C | -6.55623300 | -2.93655900 | -0.78121200 |
| H | -7.79103600 | -1.25309000 | -1.31184700 |
| H | -7.35830200 | -3.66158600 | -0.87553600 |
| H | 7.71816400  | -1.96948800 | -1.19046000 |
| H | 6.33005000  | -0.13955100 | -0.27969800 |
| H | -3.25181900 | -2.75371800 | -0.01576700 |
| H | -5.07535100 | -4.39678400 | -0.22431000 |
| H | 2.28304900  | -1.30764500 | 1.12249500  |
| H | -2.33215500 | 2.52581300  | -1.46014800 |
| H | -2.34639500 | -1.13668300 | 0.91795400  |

#### U-M14-M14

|   |             |             |             |
|---|-------------|-------------|-------------|
| U | -0.41155400 | 0.24450800  | 0.40671100  |
| O | -0.96182300 | 0.29315600  | -1.28477600 |
| N | 3.13339500  | 0.04692700  | -0.21234800 |
| O | -1.46503100 | 2.51437100  | 0.85116500  |
| C | 3.96262100  | -0.37125200 | -1.17547800 |
| O | 1.75314500  | -0.03524400 | -0.70602500 |
| O | 0.51823800  | 2.60382500  | 0.00897700  |
| N | -0.49946700 | 3.24024400  | 0.43799700  |
| O | -0.54910700 | 4.45637100  | 0.45255900  |
| O | 0.31391000  | 0.25509200  | 2.02381300  |
| N | -2.65170600 | -0.28743300 | 1.03354500  |
| O | -0.30467300 | -2.17605000 | 0.36108200  |
| C | -3.97499500 | -0.13946500 | 0.68593400  |
| O | -2.54345200 | -0.37757700 | 2.47584200  |
| O | -1.09245700 | -2.78609600 | 2.31730700  |
| N | -0.51407200 | -3.09070300 | 1.25510700  |
| O | -0.14308300 | -4.23419000 | 1.01669100  |
| N | -4.98194600 | 0.03169800  | 1.48074100  |
| H | -4.61119400 | 0.04967700  | 2.43248000  |
| C | -4.27870800 | -0.22171000 | -0.78200000 |
| C | -5.34447800 | 0.52900800  | -1.29310700 |
| C | -3.59857800 | -1.09120800 | -1.63989500 |
| C | -5.71166700 | 0.42761600  | -2.63091700 |
| C | -3.97072200 | -1.19888800 | -2.97882300 |

|   |             |             |             |
|---|-------------|-------------|-------------|
| H | -2.77623700 | -1.67939600 | -1.25620900 |
| C | -5.02434500 | -0.43922000 | -3.48176600 |
| H | -3.42679900 | -1.87541800 | -3.63029500 |
| H | -5.30616600 | -0.51876700 | -4.52791300 |
| N | 3.75210100  | -0.86211700 | -2.38231300 |
| C | 5.40498400  | -0.18668100 | -0.77096900 |
| C | 6.41573000  | -0.58836100 | -1.65186700 |
| C | 5.77406000  | 0.37116900  | 0.46063000  |
| C | 7.75908800  | -0.43703200 | -1.31517600 |
| C | 7.11760700  | 0.51472000  | 0.80006700  |
| H | 4.98957200  | 0.68637700  | 1.13637700  |
| C | 8.11910600  | 0.11404700  | -0.08545000 |
| H | 7.38430800  | 0.94493200  | 1.76150000  |
| H | 9.16631400  | 0.22980500  | 0.18071400  |
| H | -6.53404200 | 1.02631800  | -3.01266500 |
| H | -5.87867900 | 1.17522700  | -0.60784400 |
| H | 6.09997500  | -1.01796500 | -2.59486000 |
| H | 8.52910200  | -0.75289900 | -2.01448400 |
| H | -2.07786300 | -1.22942500 | 2.58199800  |
| H | 2.76987200  | -1.11464200 | -2.49129500 |
| H | 1.76317000  | 0.22535900  | -1.64417300 |

#### U-M14-M8

|   |             |             |             |
|---|-------------|-------------|-------------|
| U | 0.06300200  | 0.65031100  | -0.15635500 |
| O | -0.66441500 | 0.72959900  | -1.77349300 |
| N | 3.38238000  | 0.53100500  | -0.68402000 |
| O | -1.26455300 | 2.72518500  | 0.56504500  |
| C | 3.94587900  | -0.63619500 | -0.63056300 |
| O | 2.07875200  | 0.50055900  | -1.05977600 |
| O | 0.66074100  | 3.12211000  | -0.32605900 |
| N | -0.40528900 | 3.59067700  | 0.19973600  |
| O | -0.58336800 | 4.78748000  | 0.34138600  |
| O | 0.77034500  | 0.57670000  | 1.47378300  |
| N | -3.17173000 | -0.60397900 | 0.10774400  |
| O | 0.37728000  | -1.81682800 | -0.28918200 |
| C | -4.23175800 | -0.46368500 | 0.92386800  |
| O | -1.93667700 | -0.31562100 | 0.88912600  |
| O | -0.49913600 | -2.63307000 | 1.54292700  |
| N | 0.34882900  | -2.71932600 | 0.63832600  |
| O | 1.16047100  | -3.64544100 | 0.58169700  |
| N | -4.35889300 | -0.14859000 | 2.18922200  |
| H | -3.42812500 | 0.05356800  | 2.55451700  |
| C | -5.51546700 | -0.75750900 | 0.17810100  |
| C | -6.73084900 | -0.70853600 | 0.87107800  |

|   |             |             |             |
|---|-------------|-------------|-------------|
| C | -5.53828500 | -1.07911200 | -1.18587000 |
| C | -7.93554100 | -0.97493100 | 0.22428200  |
| C | -6.74406400 | -1.34385800 | -1.83372600 |
| H | -4.59596200 | -1.11266900 | -1.71701100 |
| C | -7.95026300 | -1.29481200 | -1.13409800 |
| H | -6.74127000 | -1.58895600 | -2.89264800 |
| H | -8.88919500 | -1.50165700 | -1.64131300 |
| N | 3.32731800  | -1.83083800 | -0.98880000 |
| H | 3.48095800  | -2.58747400 | -0.33300000 |
| C | 5.37419800  | -0.67435700 | -0.25089600 |
| C | 6.15209400  | -1.81978100 | -0.48118400 |
| C | 5.99229400  | 0.43612200  | 0.35169200  |
| C | 7.49772100  | -1.85721700 | -0.11800200 |
| C | 7.33371500  | 0.39691500  | 0.70538500  |
| H | 5.38927000  | 1.31742900  | 0.52826800  |
| C | 8.09831700  | -0.75166500 | 0.47729400  |
| H | 7.78843000  | 1.26580800  | 1.17183300  |
| H | 9.14525300  | -0.78106800 | 0.76325300  |
| H | -8.86850800 | -0.93150000 | 0.78124600  |
| H | -6.67913800 | -0.45207600 | 1.92257900  |
| H | 5.69732300  | -2.67266600 | -0.97030600 |
| H | 8.07805800  | -2.75553300 | -0.30754700 |
| H | -1.63941000 | -1.17713300 | 1.25142700  |
| H | 2.32439100  | -1.71099400 | -1.10994200 |

### U-M15-M15

|   |             |             |             |
|---|-------------|-------------|-------------|
| U | 0.07632700  | -0.26635000 | 0.00902800  |
| O | 0.05453100  | -0.87909500 | 1.70329300  |
| N | 3.82272900  | -0.08811800 | 2.08326000  |
| O | -0.56345500 | -2.58889700 | -0.89789200 |
| C | 3.56806300  | 0.29058900  | 0.86273100  |
| O | 2.71996900  | -0.32782200 | 2.89569300  |
| O | 1.55895700  | -2.26098000 | -0.71093100 |
| N | 0.61599000  | -3.03955200 | -1.07028300 |
| O | 0.82827800  | -4.14024900 | -1.55122200 |
| O | 0.15223100  | 0.30498000  | -1.68369100 |
| N | -3.75451900 | -1.35121800 | 1.52438600  |
| O | -0.30528200 | 2.02285300  | 0.73626600  |
| C | -3.50590300 | -0.54470800 | 0.53062500  |
| O | -2.65124900 | -1.94560100 | 2.13616700  |
| O | -1.69218500 | 2.75714100  | -0.79274900 |
| N | -1.01304400 | 2.98042100  | 0.22493300  |
| O | -0.97969000 | 4.08248100  | 0.77325800  |

|   |             |             |             |
|---|-------------|-------------|-------------|
| N | -2.29263900 | -0.20950000 | 0.00256000  |
| C | -4.75573700 | 0.06041100  | -0.04062900 |
| C | -4.74276400 | 1.32564600  | -0.64646300 |
| C | -5.97766900 | -0.62828200 | 0.03075600  |
| C | -5.91401100 | 1.87543100  | -1.16827600 |
| C | -7.14207000 | -0.07720200 | -0.49112000 |
| H | -5.98350100 | -1.59738600 | 0.51261000  |
| C | -7.11858300 | 1.18043900  | -1.09843200 |
| H | -8.07352600 | -0.63374400 | -0.43026600 |
| H | -8.02742600 | 1.61035000  | -1.50989200 |
| N | 2.34231000  | 0.45281200  | 0.28049500  |
| C | 4.80786600  | 0.54068900  | 0.06004700  |
| C | 4.80295100  | 0.40675200  | -1.33573600 |
| C | 6.01007400  | 0.91535200  | 0.68210400  |
| C | 5.95496800  | 0.64636100  | -2.08357800 |
| C | 7.15829200  | 1.15205900  | -0.06409700 |
| H | 6.01231400  | 1.00627400  | 1.76068400  |
| C | 7.13887500  | 1.02389700  | -1.45516100 |
| H | 8.07474800  | 1.44623500  | 0.44010500  |
| H | 8.03489000  | 1.21502700  | -2.03830500 |
| H | -5.87774600 | 2.85944400  | -1.62599000 |
| H | -3.82118600 | 1.89673500  | -0.69252700 |
| H | 3.89506000  | 0.08396400  | -1.83195900 |
| H | 5.92449800  | 0.52884500  | -3.16266200 |
| H | -1.83546100 | -1.49035800 | 1.86460000  |
| H | 1.90288200  | -0.22350400 | 2.37722200  |
| H | -2.43451700 | 0.39889300  | -0.79866600 |
| H | 2.45819800  | 0.98642300  | -0.57511400 |

### U-M15-M8

|   |             |             |             |
|---|-------------|-------------|-------------|
| U | -0.10233600 | -0.69660600 | -0.41693300 |
| O | 0.34739300  | -0.77571800 | 1.32043500  |
| N | 3.27853000  | -0.32764900 | -0.43836600 |
| O | -1.24789300 | -3.01165700 | -0.19900500 |
| C | 3.75355400  | 0.85052400  | -0.17142000 |
| O | 2.03117100  | -0.31933400 | -0.95606500 |
| O | 0.82671500  | -3.08012800 | -0.78654400 |
| N | -0.24442800 | -3.72051700 | -0.53218700 |
| O | -0.30450000 | -4.93907000 | -0.60555800 |
| O | -0.63197700 | -0.68131000 | -2.12380100 |
| N | -3.24286600 | -0.29887100 | 2.45928000  |
| O | 0.10385700  | 1.78569200  | -0.47314400 |
| C | -3.27594200 | 0.05762900  | 1.20512400  |

|   |             |             |             |
|---|-------------|-------------|-------------|
| O | -2.07551000 | -0.92334600 | 2.90033400  |
| O | -1.64342900 | 2.44133600  | -1.61824300 |
| N | -0.59212200 | 2.72786800  | -1.02966200 |
| O | -0.16264900 | 3.88331200  | -0.94954600 |
| N | -2.31140000 | -0.10038800 | 0.25263600  |
| C | -4.56544200 | 0.73590400  | 0.84253800  |
| C | -4.61275600 | 1.71678500  | -0.15932300 |
| C | -5.75880500 | 0.40782900  | 1.50617100  |
| C | -5.81693400 | 2.33948400  | -0.48822100 |
| C | -6.95716600 | 1.02960900  | 1.17449700  |
| H | -5.71199100 | -0.33887300 | 2.28839300  |
| C | -6.99623900 | 1.99948000  | 0.17003400  |
| H | -7.86888100 | 0.75190000  | 1.69700400  |
| H | -7.93323200 | 2.48228100  | -0.09315500 |
| N | 3.09693600  | 2.05040900  | -0.43771700 |
| C | 5.12952100  | 0.91179300  | 0.36059600  |
| C | 5.85925800  | 2.11214800  | 0.34855200  |
| C | 5.75033700  | -0.23236200 | 0.89597600  |
| C | 7.15663700  | 2.16907200  | 0.85672500  |
| C | 7.04343800  | -0.17211300 | 1.39542500  |
| H | 5.18588300  | -1.15591700 | 0.90272400  |
| C | 7.75849300  | 1.03050500  | 1.38465600  |
| H | 7.49893600  | -1.06843800 | 1.80623800  |
| H | 8.76714200  | 1.07496300  | 1.78412400  |
| H | -5.82469000 | 3.10074000  | -1.26266000 |
| H | -3.70078700 | 2.01477200  | -0.66603900 |
| H | 5.40959500  | 2.99499600  | -0.09012000 |
| H | 7.69940000  | 3.10983900  | 0.83254300  |
| H | -1.37098800 | -0.82272400 | 2.23532400  |
| H | -2.68241200 | 0.20281100  | -0.64232400 |
| H | 3.19209700  | 2.73290500  | 0.30364700  |
| H | 2.10912000  | 1.91654600  | -0.65464000 |

**U-M9-M13-T3**

|   |             |             |             |
|---|-------------|-------------|-------------|
| U | 0.02310200  | -0.71981500 | -0.25405000 |
| O | 0.05733000  | -0.87040900 | 1.52041600  |
| O | -0.07635500 | -0.35533600 | -1.99810400 |
| O | -0.78800100 | 1.70114700  | 0.08693600  |
| H | -1.65112200 | 1.71938700  | 0.51997200  |
| C | -0.73430900 | 2.72181700  | -0.93711900 |
| C | -0.90827700 | 4.10982200  | -0.34567400 |
| H | -1.48853200 | 2.50978100  | -1.70056100 |
| H | 0.24469100  | 2.60142200  | -1.39946900 |

|   |             |             |             |
|---|-------------|-------------|-------------|
| H | -0.82090200 | 4.86593500  | -1.13101800 |
| H | -1.89306800 | 4.22247500  | 0.11789900  |
| H | -0.14721700 | 4.30772900  | 0.41228900  |
| O | -1.67931800 | -2.25507900 | -0.37763700 |
| N | -2.40077700 | -1.11354500 | -0.19334200 |
| C | -3.64679300 | -1.25353100 | 0.12573300  |
| N | -4.19357800 | -2.49608600 | 0.35497900  |
| C | -4.47432500 | -0.04746700 | 0.32589500  |
| H | -5.15322900 | -2.62581100 | 0.07185200  |
| H | -3.56235600 | -3.24583800 | 0.09912500  |
| C | -5.47606500 | -0.02368800 | 1.30582800  |
| C | -4.27089900 | 1.09375900  | -0.46495800 |
| C | -6.24209200 | 1.12205100  | 1.50293200  |
| H | -5.63129900 | -0.89796300 | 1.92676200  |
| C | -5.03739600 | 2.23753000  | -0.26162000 |
| H | -3.53452400 | 1.05372900  | -1.25853000 |
| C | -6.02393600 | 2.25697000  | 0.72462700  |
| H | -7.00670600 | 1.13017700  | 2.27152900  |
| H | -4.88253200 | 3.10798300  | -0.88983500 |
| H | -6.62463100 | 3.14629800  | 0.87719400  |
| N | 3.16443200  | -1.48177500 | -0.17468600 |
| C | 3.30921100  | -0.16075100 | 0.01324100  |
| O | 1.93393300  | -1.94759000 | -0.51729800 |
| N | 2.23316300  | 0.58517600  | -0.03644400 |
| C | 4.68480300  | 0.32957300  | 0.28581700  |
| H | 2.40644500  | 1.53068900  | 0.28414700  |
| C | 5.55317800  | -0.38488200 | 1.12137000  |
| C | 5.12527700  | 1.52587900  | -0.29454000 |
| C | 6.83974800  | 0.08819700  | 1.36465600  |
| H | 5.20691600  | -1.29377400 | 1.59912500  |
| C | 6.41136800  | 1.99476900  | -0.04859900 |
| H | 4.46208400  | 2.07230700  | -0.95534700 |
| C | 7.27199800  | 1.27697600  | 0.78084800  |
| H | 7.50091200  | -0.46700800 | 2.02021500  |
| H | 6.74496200  | 2.91735400  | -0.50983300 |
| H | 8.27349800  | 1.64447500  | 0.97327600  |
| H | 3.93885500  | -2.03673200 | -0.51483800 |

**U-M9-M13-T2**

|   |             |            |             |
|---|-------------|------------|-------------|
| U | -0.12693200 | 0.83269900 | 0.00303300  |
| O | 0.07415900  | 0.72299300 | 1.77464600  |
| O | -0.21422500 | 1.19417800 | -1.74014500 |
| O | 0.09820600  | 3.34228200 | 0.41023900  |
| H | -0.15646000 | 3.47817000 | 1.33150900  |

|   |             |             |             |   |             |             |             |
|---|-------------|-------------|-------------|---|-------------|-------------|-------------|
| C | -0.60051500 | 4.30650600  | -0.42619700 | U | -1.34812300 | -0.40820300 | -0.10151800 |
| C | -0.29069300 | 5.73011000  | -0.00171800 | O | -1.23824400 | -0.18501100 | -1.86097200 |
| H | -1.67003500 | 4.08636000  | -0.38849900 | O | -1.57615500 | -0.62965600 | 1.65130400  |
| H | -0.24754800 | 4.09995600  | -1.43552600 | O | -3.77229600 | 0.48147000  | -0.18753400 |
| H | -0.79061600 | 6.43516600  | -0.67154800 | H | -3.45772800 | 1.40189100  | -0.26923300 |
| H | -0.64733400 | 5.93051200  | 1.01367700  | C | -4.72417400 | 0.39691100  | 0.89706900  |
| H | 0.78377800  | 5.92342500  | -0.03649200 | C | -5.99191800 | 1.17126600  | 0.57792800  |
| O | -2.31200400 | 1.56199200  | 0.32040100  | H | -4.25420200 | 0.75261500  | 1.81839000  |
| N | -2.43923900 | 0.21745400  | 0.11558800  | H | -4.93602500 | -0.66659300 | 1.01539800  |
| C | -3.62234700 | -0.29766800 | 0.20690400  | H | -6.71919800 | 1.05380100  | 1.38647200  |
| N | -4.71781700 | 0.51386500  | 0.41353700  | H | -5.78375200 | 2.23966300  | 0.46805600  |
| C | -3.81566800 | -1.75050600 | 0.02662200  | H | -6.44170600 | 0.81039800  | -0.34953100 |
| H | -5.45827900 | 0.12173300  | 0.97541200  | O | -1.15255700 | -2.67599000 | -0.38102900 |
| H | -4.44540900 | 1.45676600  | 0.66307200  | N | 0.13979700  | -2.31215700 | -0.13681800 |
| C | -5.07764300 | -2.25412100 | -0.31976500 | C | 1.04606100  | -3.22610600 | -0.26082700 |
| C | -2.74974800 | -2.64769400 | 0.19595800  | N | 0.72813100  | -4.48289300 | -0.72316100 |
| C | -5.27500300 | -3.62289000 | -0.48026600 | C | 2.45407000  | -2.90260300 | 0.04368600  |
| H | -5.89925300 | -1.57016200 | -0.49651700 | H | 1.25672700  | -5.25061400 | -0.33760800 |
| C | -2.95293500 | -4.01179400 | 0.02756000  | H | -0.27133400 | -4.63211600 | -0.78530800 |
| H | -1.76482700 | -2.27680500 | 0.45049100  | C | 3.49390800  | -3.53532100 | -0.65085200 |
| C | -4.21437000 | -4.50709600 | -0.30447200 | C | 2.77059800  | -1.97069200 | 1.04303400  |
| H | -6.25611600 | -3.99539700 | -0.75289400 | C | 4.82163300  | -3.23527700 | -0.35861000 |
| H | -2.12046100 | -4.69359100 | 0.16054100  | H | 3.25636200  | -4.24229500 | -1.43704600 |
| H | -4.36668600 | -5.57331500 | -0.42944500 | C | 4.09876700  | -1.67251600 | 1.32804300  |
| N | 1.83891200  | -1.73637900 | -0.09519500 | H | 1.96813600  | -1.50237200 | 1.59951300  |
| C | 2.78725300  | -0.78497400 | -0.10480500 | C | 5.12886300  | -2.30327800 | 0.62983100  |
| O | 0.54413000  | -1.36128600 | -0.28479700 | H | 5.61651000  | -3.72526300 | -0.90957400 |
| N | 2.40442700  | 0.46611300  | -0.15884700 | H | 4.33224100  | -0.95878900 | 2.11042700  |
| C | 4.19751800  | -1.24776000 | -0.03423500 | H | 6.16321500  | -2.07320900 | 0.85893300  |
| H | 3.17596600  | 1.11104300  | -0.03342700 | N | -0.60940800 | 2.78224900  | -0.04067200 |
| C | 4.56862200  | -2.30390200 | 0.80806800  | C | 0.62498400  | 2.25801800  | 0.01458700  |
| C | 5.17667500  | -0.61985500 | -0.81468500 | O | -1.67349700 | 1.94932100  | 0.14595800  |
| C | 5.89435300  | -2.72548000 | 0.86227200  | N | 0.73931500  | 0.95652000  | 0.10972500  |
| H | 3.82162000  | -2.77222200 | 1.43806500  | C | 1.76028800  | 3.21337700  | -0.05991000 |
| C | 6.49988000  | -1.04436900 | -0.75698200 | H | 1.69153900  | 0.63075600  | -0.00579200 |
| H | 4.89174600  | 0.18580500  | -1.48171400 | C | 1.71628000  | 4.32045700  | -0.91734400 |
| C | 6.86217900  | -2.09807000 | 0.08096200  | C | 2.89718400  | 3.00713900  | 0.73164500  |
| H | 6.17288600  | -3.53730500 | 1.52448200  | C | 2.78710900  | 5.20823800  | -0.97260100 |
| H | 7.24802400  | -0.55672700 | -1.37148000 | H | 0.85582800  | 4.46429100  | -1.56005900 |
| H | 7.89432500  | -2.42620700 | 0.12636300  | C | 3.96475600  | 3.89643000  | 0.67268500  |
| H | 2.06094700  | -2.66679100 | -0.42477700 | H | 2.93147500  | 2.15866200  | 1.40510600  |
|   |             |             |             | C | 3.91234700  | 4.99948700  | -0.17822200 |
|   |             |             |             | H | 2.74723800  | 6.05622600  | -1.64669700 |
|   |             |             |             | H | 4.83687200  | 3.73147600  | 1.29499900  |

**U-M9-M13-T1**

|   |             |            |             |
|---|-------------|------------|-------------|
| H | 4.74667300  | 5.68995400 | -0.22495400 |
| H | -0.75895500 | 3.73596300 | 0.26194000  |

**U-M9-M13-T2'**

|   |             |             |             |
|---|-------------|-------------|-------------|
| U | -0.06295500 | 0.39112100  | -0.08203000 |
| O | -0.14927600 | 0.40037300  | 1.70334800  |
| O | 0.22379800  | 0.57045700  | -1.83495800 |
| O | 1.47974000  | 2.39303200  | 0.21805600  |
| H | 1.48783500  | 2.79220000  | 1.09520900  |
| C | 2.02311000  | 3.31176300  | -0.76409100 |
| C | 3.46457500  | 3.67103000  | -0.45260900 |
| H | 1.38333400  | 4.19834800  | -0.80629700 |
| H | 1.93378500  | 2.78111000  | -1.71070100 |
| H | 3.86091700  | 4.32962200  | -1.23045000 |
| H | 3.54648900  | 4.20051100  | 0.50222700  |
| H | 4.08601500  | 2.77443800  | -0.40816700 |
| O | 0.44912800  | -1.84921400 | -0.14551800 |
| N | 1.68464700  | -1.30164700 | 0.03489500  |
| C | 2.69954200  | -2.10004100 | -0.03200400 |
| N | 2.53447800  | -3.42831900 | -0.36661600 |
| C | 4.06164400  | -1.57549100 | 0.18625600  |
| H | 3.15024200  | -4.08111200 | 0.09505800  |
| H | 1.55754700  | -3.69578600 | -0.37575300 |
| C | 5.16072600  | -2.16762700 | -0.45122900 |
| C | 4.28008500  | -0.48548600 | 1.04112700  |
| C | 6.44672100  | -1.67588700 | -0.24431100 |
| H | 4.99872900  | -2.99701000 | -1.12951000 |
| C | 5.56558900  | 0.00479200  | 1.24082400  |
| H | 3.43538600  | -0.04437600 | 1.55501100  |
| C | 6.65437700  | -0.58830300 | 0.60052400  |
| H | 7.28632900  | -2.13923800 | -0.75030100 |
| H | 5.72246200  | 0.84246100  | 1.91154400  |
| H | 7.65642300  | -0.20795900 | 0.76370600  |
| N | -3.13437300 | 1.39845700  | 0.03997200  |
| C | -3.36077600 | 0.07343100  | -0.04270100 |
| O | -1.86450800 | 1.82898600  | -0.21290000 |
| N | -2.32175300 | -0.70291100 | -0.20161000 |
| C | -4.76937600 | -0.38009400 | 0.07674000  |
| H | -2.53053000 | -1.69032400 | -0.11916900 |
| C | -5.65216300 | 0.23416700  | 0.97468600  |
| C | -5.22820600 | -1.44114000 | -0.71443800 |
| C | -6.97055300 | -0.20210700 | 1.07186300  |
| H | -5.29327500 | 1.03231600  | 1.61366300  |

|   |             |             |             |
|---|-------------|-------------|-------------|
| C | -6.54591900 | -1.87419100 | -0.61309900 |
| H | -4.55348100 | -1.90997700 | -1.42155500 |
| C | -7.42059600 | -1.25572000 | 0.27915800  |
| H | -7.64307100 | 0.27355600  | 1.77663500  |
| H | -6.89225200 | -2.69163600 | -1.23515400 |
| H | -8.44667500 | -1.59630600 | 0.35860700  |
| H | -3.85908800 | 2.04329900  | -0.24872800 |

**U-M9-M16-T3**

|   |             |             |             |
|---|-------------|-------------|-------------|
| U | 0.04015800  | -0.18317900 | 0.20264000  |
| O | -0.18578200 | -0.32871200 | 1.96643700  |
| O | 0.15438900  | 0.26914100  | -1.52033800 |
| O | -0.85584500 | 2.13756400  | 0.60580700  |
| H | -1.18636100 | 2.30911000  | 1.49506500  |
| C | -1.22009400 | 3.21605300  | -0.29467700 |
| C | -0.57636900 | 4.52744800  | 0.11618800  |
| H | -2.31101000 | 3.29022100  | -0.32279400 |
| H | -0.86999000 | 2.88445200  | -1.27124600 |
| H | -0.84315500 | 5.31175800  | -0.59750500 |
| H | -0.91717200 | 4.84884000  | 1.10518700  |
| H | 0.51146300  | 4.43610100  | 0.13584200  |
| O | -1.15693300 | -2.08381500 | -0.22252600 |
| N | -2.15328000 | -1.14719800 | -0.21735800 |
| C | -3.37107500 | -1.58401000 | -0.19654000 |
| N | -3.64442200 | -2.92629300 | -0.09015500 |
| C | -4.48781700 | -0.61816400 | -0.22835000 |
| H | -4.46897400 | -3.26305700 | -0.56294400 |
| H | -2.81859000 | -3.50444500 | -0.18022600 |
| C | -5.68168800 | -0.88798300 | 0.45391500  |
| C | -4.37099700 | 0.57830400  | -0.94991000 |
| C | -6.73147400 | 0.02599300  | 0.42438100  |
| H | -5.77281800 | -1.80296400 | 1.02735100  |
| C | -5.42197000 | 1.48863200  | -0.97471200 |
| H | -3.46053300 | 0.76837400  | -1.50472600 |
| C | -6.60527600 | 1.21676100  | -0.28754500 |
| H | -7.64677200 | -0.19020700 | 0.96368400  |
| H | -5.32678700 | 2.40432800  | -1.54796600 |
| H | -7.42559500 | 1.92499100  | -0.31390400 |
| N | 3.03002600  | -1.71675900 | -0.60673900 |
| C | 3.29987500  | -0.56896600 | -0.04898200 |
| O | 1.63572200  | -2.02879700 | -0.30171800 |
| N | 2.36747800  | 0.21339200  | 0.54563200  |
| C | 4.73396500  | -0.16034900 | -0.11388000 |

|   |            |             |             |
|---|------------|-------------|-------------|
| H | 2.77721100 | 0.86317100  | 1.20690800  |
| C | 5.75451500 | -1.11943200 | -0.13613000 |
| C | 5.07829400 | 1.19582600  | -0.15227200 |
| C | 7.08766100 | -0.72742400 | -0.19138600 |
| H | 5.48459900 | -2.16703400 | -0.10512200 |
| C | 6.41373800 | 1.58631000  | -0.20469800 |
| H | 4.29319400 | 1.94302200  | -0.16292900 |
| C | 7.42256100 | 0.62600900  | -0.22284700 |
| H | 7.86875600 | -1.47959300 | -0.20296400 |
| H | 6.66579100 | 2.64054500  | -0.23920700 |
| H | 8.46289300 | 0.92950300  | -0.26174100 |
| H | 1.41521900 | -2.74975100 | -0.89994000 |

**U-M9-M16-T2**

|   |             |             |             |
|---|-------------|-------------|-------------|
| U | -0.06494800 | 1.00517500  | 0.21470800  |
| O | -0.17297700 | 1.14059800  | 1.99028600  |
| O | 0.15043000  | 1.08562300  | -1.55261400 |
| O | 0.66284500  | 3.41115600  | 0.31474700  |
| H | 0.50879500  | 3.84047200  | 1.16446700  |
| C | 0.70705200  | 4.39926700  | -0.75097000 |
| C | 1.83781900  | 5.38872300  | -0.54055300 |
| H | -0.26542100 | 4.89626900  | -0.80481100 |
| H | 0.84257300  | 3.81385800  | -1.65895100 |
| H | 1.86898800  | 6.09865500  | -1.37148300 |
| H | 1.70083300  | 5.96319000  | 0.38093200  |
| H | 2.79991400  | 4.87482000  | -0.49011500 |
| O | -2.20834900 | 1.83364400  | -0.00418600 |
| N | -2.39949100 | 0.48207200  | 0.02920200  |
| C | -3.59863600 | 0.04126200  | -0.17554600 |
| N | -4.61830800 | 0.90133900  | -0.50884700 |
| C | -3.86253300 | -1.41065400 | -0.11884300 |
| H | -5.53997300 | 0.65856800  | -0.17914900 |
| H | -4.35838500 | 1.87397300  | -0.40427400 |
| C | -4.85332400 | -1.98205900 | -0.92923000 |
| C | -3.12965600 | -2.23663800 | 0.74664400  |
| C | -5.09854000 | -3.35146800 | -0.88156700 |
| H | -5.40861100 | -1.35437400 | -1.61615800 |
| C | -3.37371300 | -3.60554200 | 0.78346600  |
| H | -2.38396500 | -1.79676500 | 1.39671700  |
| C | -4.35896600 | -4.16736300 | -0.02833600 |
| H | -5.86119000 | -3.78266700 | -1.52013700 |
| H | -2.80091100 | -4.23279500 | 1.45691800  |
| H | -4.54998300 | -5.23382900 | 0.00646700  |

|   |             |             |             |
|---|-------------|-------------|-------------|
| N | 1.32458100  | -2.12918100 | -0.34772100 |
| C | 2.27562000  | -1.31584200 | 0.02128400  |
| O | 0.04501900  | -1.48842700 | -0.02474200 |
| N | 2.06504100  | -0.05813700 | 0.47016400  |
| C | 3.65444000  | -1.87808500 | -0.09578500 |
| H | 2.85101100  | 0.29522900  | 1.00393200  |
| C | 3.88947300  | -3.24924300 | 0.06539400  |
| C | 4.73593200  | -1.03340400 | -0.37169800 |
| C | 5.17852000  | -3.76005200 | -0.04334600 |
| H | 3.05093500  | -3.89938700 | 0.27856700  |
| C | 6.02593100  | -1.54643400 | -0.47776400 |
| H | 4.55796500  | 0.02477300  | -0.52504600 |
| C | 6.25154900  | -2.91106200 | -0.31252200 |
| H | 5.34803100  | -4.82307100 | 0.08826200  |
| H | 6.85363700  | -0.88107000 | -0.69748500 |
| H | 7.25628700  | -3.31084600 | -0.39346700 |
| H | -0.59964900 | -2.02289800 | -0.49964900 |

**U-M9-M16-T1**

|   |             |             |             |
|---|-------------|-------------|-------------|
| U | 1.23884800  | -0.63315600 | -0.09375600 |
| O | 1.25230400  | -0.81116200 | -1.86463700 |
| O | 1.45344300  | -0.65036800 | 1.67689900  |
| O | 3.52422600  | -1.74828700 | -0.21785400 |
| H | 3.86874600  | -1.79952700 | -1.11745700 |
| C | 4.62029800  | -1.61500700 | 0.72952100  |
| C | 5.42793700  | -0.35362300 | 0.48285500  |
| H | 5.23656000  | -2.51678200 | 0.66658200  |
| H | 4.13465600  | -1.59295200 | 1.70411400  |
| H | 6.21844700  | -0.26810600 | 1.23386400  |
| H | 5.90587400  | -0.37335600 | -0.50172700 |
| H | 4.78798300  | 0.52887100  | 0.54253900  |
| O | 2.38454200  | 1.35136100  | -0.26180400 |
| N | 1.08405000  | 1.75601500  | -0.10715100 |
| C | 0.84226900  | 3.02371000  | -0.20529300 |
| N | 1.83698100  | 3.90385500  | -0.55354700 |
| C | -0.52895600 | 3.52865600  | 0.00715300  |
| H | 1.77875500  | 4.83307600  | -0.16690800 |
| H | 2.75623300  | 3.48104800  | -0.55400400 |
| C | -0.97594600 | 4.67011100  | -0.67223600 |
| C | -1.39474000 | 2.88395900  | 0.90211700  |
| C | -2.26444300 | 5.15399600  | -0.46413600 |
| H | -0.32142800 | 5.15956400  | -1.38392800 |
| C | -2.68159100 | 3.37090400  | 1.10359000  |
| H | -1.04683200 | 2.01160000  | 1.44071700  |

|   |             |             |             |
|---|-------------|-------------|-------------|
| C | -3.12067500 | 4.50698700  | 0.42365900  |
| H | -2.60169000 | 6.03233400  | -1.00269200 |
| H | -3.33960900 | 2.87037000  | 1.80501300  |
| H | -4.12309000 | 4.88587400  | 0.58719000  |
| N | -1.33132500 | -3.03013500 | 0.27404600  |
| C | -1.85522100 | -1.85072000 | 0.06603100  |
| O | 0.14011500  | -2.88503400 | 0.21460700  |
| N | -1.15769600 | -0.70598900 | -0.06566900 |
| C | -3.34982400 | -1.86526800 | -0.00186300 |
| H | -1.74018700 | 0.06349400  | -0.37308700 |
| C | -4.03191200 | -2.97778400 | -0.50995300 |
| C | -4.08987100 | -0.76641100 | 0.44931900  |
| C | -5.42175900 | -2.98590400 | -0.56786200 |
| H | -3.45742100 | -3.82581500 | -0.85870400 |
| C | -5.48076500 | -0.77655000 | 0.39021900  |
| H | -3.57507500 | 0.09241100  | 0.86414200  |
| C | -6.15142600 | -1.88577100 | -0.11975700 |
| H | -5.93705200 | -3.85143600 | -0.96952700 |
| H | -6.04067700 | 0.08082000  | 0.74718900  |
| H | -7.23466300 | -1.89268200 | -0.16869300 |
| H | 0.43510000  | -3.55445000 | 0.83930400  |

**U-M9-M16-T2'**

|   |             |             |             |
|---|-------------|-------------|-------------|
| U | -0.09991300 | 0.23361900  | 0.18964400  |
| O | 0.06001100  | 0.42894400  | 1.95476400  |
| O | -0.07218200 | 0.32020300  | -1.59126200 |
| O | 1.19505200  | 2.42485900  | 0.09404500  |
| H | 1.45429000  | 2.82345300  | 0.93249000  |
| C | 1.74596600  | 3.17548800  | -1.02050800 |
| C | 3.25940100  | 3.25762500  | -0.95286800 |
| H | 1.28879500  | 4.17007600  | -1.02769300 |
| H | 1.41098100  | 2.63323300  | -1.90349200 |
| H | 3.63972700  | 3.80114100  | -1.82213100 |
| H | 3.59020800  | 3.79393900  | -0.05758400 |
| H | 3.70485000  | 2.26115300  | -0.94588300 |
| O | 0.62169400  | -1.91855800 | 0.20826800  |
| N | 1.82551500  | -1.25873000 | 0.19038800  |
| C | 2.87651400  | -1.98879200 | -0.00229500 |
| N | 2.76945200  | -3.33096700 | -0.27307400 |
| C | 4.21389000  | -1.36183600 | 0.01247600  |
| H | 3.51084100  | -3.92455500 | 0.06556900  |
| H | 1.82900400  | -3.68368600 | -0.14678100 |
| C | 5.23170700  | -1.84219200 | -0.82267800 |

|   |             |             |             |
|---|-------------|-------------|-------------|
| C | 4.48726400  | -0.28932100 | 0.87249600  |
| C | 6.49341100  | -1.25440600 | -0.80437700 |
| H | 5.02170400  | -2.66012700 | -1.50179200 |
| C | 5.74926000  | 0.29527100  | 0.88603300  |
| H | 3.70865100  | 0.05952400  | 1.53951200  |
| C | 6.75630000  | -0.18453700 | 0.04839700  |
| H | 7.27010100  | -1.62926200 | -1.46131600 |
| H | 5.95398300  | 1.11661800  | 1.56377300  |
| H | 7.74092300  | 0.26872600  | 0.06558200  |
| N | -3.33926000 | 1.57909800  | -0.19083800 |
| C | -3.41632700 | 0.29385500  | 0.02383800  |
| O | -1.94988600 | 1.98904100  | 0.08254300  |
| N | -2.35975000 | -0.49154600 | 0.31443800  |
| C | -4.79525000 | -0.26888600 | -0.09445100 |
| H | -2.63444100 | -1.41021600 | 0.64205800  |
| C | -5.91522300 | 0.49611800  | 0.25330000  |
| C | -4.98423300 | -1.57506100 | -0.56092600 |
| C | -7.19453600 | -0.03849500 | 0.14210800  |
| H | -5.76495900 | 1.50568400  | 0.61304600  |
| C | -6.26562000 | -2.10846500 | -0.66998600 |
| H | -4.12541600 | -2.16533400 | -0.85979200 |
| C | -7.37444800 | -1.34267900 | -0.31713100 |
| H | -8.05372900 | 0.56181700  | 0.42053600  |
| H | -6.39747500 | -3.12005400 | -1.03763500 |
| H | -8.37238900 | -1.75887600 | -0.39962000 |
| H | -1.90132300 | 2.84078100  | -0.35996400 |

**U-M13-M13-T2**

|   |             |             |             |
|---|-------------|-------------|-------------|
| U | 0.02855900  | 0.27487200  | 0.16604700  |
| O | 0.02268600  | -0.34700000 | -1.49998100 |
| O | -0.00323500 | 1.00924900  | 1.78712400  |
| O | -0.34529600 | 2.68672900  | -0.71505400 |
| H | 0.59703400  | 2.78553200  | -0.94845900 |
| C | -0.73566400 | 3.77600600  | 0.14851800  |
| C | -0.68895400 | 5.10674500  | -0.58406100 |
| H | -0.09641100 | 3.78069100  | 1.03587300  |
| H | -1.75082600 | 3.54083400  | 0.47111900  |
| H | -1.03525700 | 5.91117500  | 0.07144200  |
| H | 0.33116400  | 5.34761800  | -0.89755200 |
| H | -1.32495400 | 5.08381300  | -1.47198000 |
| O | 1.95304300  | 1.60783200  | -0.42456700 |
| N | 3.16076300  | 0.98912400  | -0.50039400 |
| C | 3.30728900  | -0.24147400 | -0.00071400 |
| N | 2.25825400  | -0.82345700 | 0.53291900  |



|   |             |             |             |
|---|-------------|-------------|-------------|
| C | 4.66420900  | -0.84219600 | -0.08305800 |
| H | 2.48706800  | -1.67420400 | 1.03245600  |
| C | 4.80381200  | -2.19943100 | -0.39982100 |
| C | 5.81124300  | -0.07622300 | 0.16204400  |
| C | 6.06713600  | -2.77626700 | -0.47617800 |
| H | 3.91937200  | -2.79147900 | -0.60517400 |
| C | 7.07386600  | -0.65726500 | 0.08349400  |
| H | 5.70891300  | 0.96539900  | 0.44343300  |
| C | 7.20478600  | -2.00700700 | -0.23597900 |
| H | 6.16444800  | -3.82572400 | -0.72964000 |
| H | 7.95477700  | -0.05831100 | 0.28461300  |
| H | 8.18842500  | -2.45894300 | -0.29396800 |
| N | -2.37679300 | -1.83541400 | 0.60716400  |
| C | -3.12917100 | -0.80714700 | 0.17234900  |
| O | -1.07887300 | -1.57537500 | 0.93134000  |
| N | -2.53454200 | 0.33740500  | -0.04218000 |
| C | -4.57191200 | -1.08431300 | -0.04835500 |
| H | -3.13225900 | 1.00369100  | -0.51722200 |
| C | -4.99653900 | -2.29790900 | -0.60485400 |
| C | -5.52741200 | -0.12096700 | 0.29939900  |
| C | -6.35270200 | -2.54280800 | -0.80226000 |
| H | -4.25985200 | -3.03320700 | -0.90617100 |
| C | -6.88115900 | -0.36961400 | 0.09961700  |
| H | -5.20459100 | 0.81259300  | 0.74583500  |
| C | -7.29737900 | -1.58114900 | -0.45060200 |
| H | -6.67040100 | -3.48128900 | -1.24213600 |
| H | -7.61259600 | 0.37989900  | 0.37956800  |
| H | -8.35277500 | -1.77276100 | -0.60725300 |
| H | -2.80590100 | -2.56907200 | 1.15663200  |
| H | 3.81811400  | 1.36656900  | -1.16839900 |

### U-M13-M13-T3

|   |             |             |             |
|---|-------------|-------------|-------------|
| U | -0.04816100 | -0.15265100 | -0.17645900 |
| O | -0.02294500 | -0.65387000 | 1.53929300  |
| O | -0.06153900 | 0.68181900  | -1.75775500 |
| O | -0.05408400 | 2.22907900  | 0.76038100  |
| H | 0.17799000  | 2.35373900  | 1.68649500  |
| C | -0.03056200 | 3.48499400  | 0.04471200  |
| C | 1.36598000  | 4.07867400  | -0.02288300 |
| H | -0.73781900 | 4.17272800  | 0.52022500  |
| H | -0.40049400 | 3.23754700  | -0.94886500 |
| H | 1.34975300  | 5.01036900  | -0.59539200 |
| H | 1.75294800  | 4.30866300  | 0.97525200  |

|   |             |             |             |
|---|-------------|-------------|-------------|
| H | 2.04771500  | 3.38275800  | -0.51508800 |
| O | -1.62397100 | -1.70259400 | -0.78964700 |
| N | -2.94782400 | -1.59589000 | -0.50850000 |
| C | -3.40218200 | -0.41802800 | -0.05354300 |
| N | -2.51877500 | 0.51716800  | 0.18484000  |
| C | -4.86769100 | -0.29743900 | 0.15813400  |
| H | -2.91561700 | 1.31590600  | 0.66481900  |
| C | -5.52508500 | 0.89209300  | -0.18094000 |
| C | -5.60864700 | -1.35548600 | 0.70064700  |
| C | -6.89651100 | 1.01820700  | 0.01362500  |
| H | -4.95829800 | 1.70661700  | -0.61736600 |
| C | -6.98140600 | -1.22534400 | 0.89327100  |
| H | -5.10058300 | -2.26639800 | 0.99457400  |
| C | -7.62839700 | -0.04000700 | 0.55072700  |
| H | -7.39631000 | 1.94033800  | -0.26068400 |
| H | -7.54374300 | -2.04702100 | 1.32210900  |
| H | -8.69693800 | 0.06031300  | 0.70351600  |
| N | 2.81821700  | -1.64885100 | -0.54371700 |
| C | 3.30952900  | -0.49341300 | -0.07648000 |
| O | 1.49636500  | -1.71873700 | -0.83517700 |
| N | 2.46051500  | 0.47642200  | 0.16275800  |
| C | 4.77709700  | -0.43230000 | 0.14922800  |
| H | 2.89771400  | 1.25010200  | 0.64901600  |
| C | 5.46676600  | -1.51875600 | 0.70329100  |
| C | 5.48840600  | 0.72668700  | -0.18660600 |
| C | 6.84178000  | -1.44669100 | 0.90982500  |
| H | 4.91758100  | -2.40590400 | 0.99599500  |
| C | 6.86197000  | 0.79482500  | 0.02176100  |
| H | 4.96273700  | 1.56314100  | -0.63274700 |
| C | 7.54248100  | -0.29158500 | 0.56992100  |
| H | 7.36390300  | -2.29003400 | 1.34736500  |
| H | 7.40360900  | 1.69357300  | -0.25075600 |
| H | 8.61272000  | -0.23652900 | 0.73335100  |
| H | -3.54922600 | -2.20345900 | -1.04927800 |
| H | 3.40647800  | -2.28864000 | -1.06091900 |

### U-M13-M13-T1

|   |             |             |             |
|---|-------------|-------------|-------------|
| U | -0.02861200 | -1.06173800 | -0.01027700 |
| O | 0.08303800  | -0.93593200 | 1.76439200  |
| O | -0.16825800 | -1.29229400 | -1.77193200 |
| O | -0.44812100 | -3.54386700 | 0.29988400  |
| H | -0.55917200 | -3.82381100 | 1.21529200  |
| C | -1.13839700 | -4.45670300 | -0.59022500 |



H 3.05533600 1.11049100 0.15573900

### U-M13-M10-T3

U -0.00208400 -0.25702400 0.16105600  
O -0.12005100 -0.43496900 -1.61690500  
O 0.02010400 0.30387000 1.86113600  
O -0.01197900 2.25252700 -0.45928300  
H 0.27165200 2.35652400 -1.37535400  
C 0.51091400 3.33359300 0.35107700  
C 0.03459500 4.68628400 -0.14733100  
H 1.60328900 3.27342600 0.36909000  
H 0.15261500 3.12090700 1.35726200  
H 0.41235100 5.47910700 0.50393300  
H 0.39671700 4.88938300 -1.16011900  
H -1.05632000 4.73838900 -0.15411200  
O 1.56474700 -1.89457300 0.46570500  
N 2.89450500 -1.72675900 0.27453100  
C 3.35604200 -0.50555700 -0.00867900  
N 2.47696400 0.46179500 -0.14396700  
C 4.82598900 -0.35894200 -0.16493300  
C 5.47299200 0.76910500 0.35554000  
C 5.58063000 -1.33073100 -0.83495000  
C 6.84840100 0.91900200 0.21321200  
H 4.89593100 1.51331600 0.89257500  
C 6.95723100 -1.17708400 -0.97455900  
H 5.08215900 -2.18967700 -1.26873000  
C 7.59388600 -0.05366100 -0.45159000  
H 7.34072600 1.79100700 0.62838000  
H 7.53080000 -1.93059900 -1.50204900  
H 8.66560500 0.06485600 -0.56273600  
N -2.95801700 -1.68061500 0.33901600  
C -3.44793300 -0.51252900 0.10492700  
O -1.64103400 -1.72784200 0.52102000  
N -2.54179800 0.62938500 0.06907200  
C -4.89304600 -0.33698700 -0.11267600  
H -2.70545100 1.19235400 -0.76205800  
C -5.74429100 -1.45672700 -0.17537100  
C -5.46245600 0.93649200 -0.26069100  
C -7.10670600 -1.29850800 -0.37714200  
H -5.31089700 -2.44169100 -0.06267400  
C -6.83305200 1.08997000 -0.46432100  
H -4.84105300 1.82340900 -0.21115000

C -7.66176000 -0.02442200 -0.52393700  
H -7.74417000 -2.17461500 -0.42299500  
H -7.24944500 2.08522600 -0.57460600  
H -8.72750000 0.09357000 -0.68322500  
H -2.70463800 1.23584000 0.87137100  
H 3.48625500 -2.43377100 0.68902600  
H 2.90865300 1.30474400 -0.50435500

### U-M13-M10-T1

U -0.00449700 -0.98300000 -0.29871500  
O -0.38919500 -0.95183400 1.44219800  
O 0.32821900 -0.91151600 -2.04519000  
O 0.58512200 -3.46079900 -0.15846900  
H 1.54313700 -3.38236900 -0.01785600  
C 0.01995600 -4.51155300 0.65749200  
C 0.39505300 -4.37349900 2.12338200  
H 0.34596300 -5.47266800 0.24721600  
H -1.05803400 -4.43242400 0.51318400  
H -0.07499200 -5.17220300 2.70433700  
H 1.47787800 -4.45101900 2.26188800  
H 0.06419100 -3.41099100 2.51714700  
O -2.17357600 -1.37895900 -0.71067000  
N -3.24070500 -0.62664400 -0.44059000  
C -3.00917200 0.63275700 -0.30691900  
N -1.63727300 1.11558900 -0.45984800  
C -4.10658500 1.56932200 -0.01420000  
H -1.42683600 1.80155400 0.26096300  
C -3.91428000 2.95844600 -0.04073900  
C -5.38910100 1.08130100 0.29936600  
C -4.96444900 3.83244800 0.23579300  
H -2.94420500 3.37370600 -0.28922200  
C -6.43046800 1.95481900 0.57241300  
H -5.54303500 0.01061300 0.32264500  
C -6.22605400 3.33671400 0.54411800  
H -4.79141400 4.90251000 0.20691900  
H -7.41042600 1.55777700 0.81318200  
H -7.04278300 4.01549100 0.76139400  
N 3.22135300 -0.53943600 0.12821700  
C 2.84073500 0.74276700 0.08310200  
O 2.26573000 -1.50711100 0.15972700  
N 1.56065700 1.00926200 -0.03485900  
C 3.91887400 1.76301700 0.15404800  
C 5.12345700 1.58968600 -0.53987600

|   |             |             |             |
|---|-------------|-------------|-------------|
| C | 3.73102900  | 2.92160800  | 0.91865000  |
| C | 6.12211800  | 2.55669000  | -0.46346300 |
| H | 5.26162300  | 0.71232500  | -1.16075500 |
| C | 4.73140700  | 3.88515400  | 0.99158000  |
| H | 2.80841900  | 3.05134400  | 1.47291900  |
| C | 5.92925600  | 3.70502500  | 0.30134900  |
| H | 7.04667500  | 2.41812400  | -1.01208700 |
| H | 4.57923400  | 4.77374800  | 1.59342400  |
| H | 6.70717600  | 4.45775100  | 0.35745700  |
| H | -1.52528900 | 1.58196400  | -1.35959800 |
| H | 1.40092400  | 1.99473400  | -0.20702800 |
| H | 4.10618900  | -0.79177800 | 0.54783300  |

**U-M16-M10-T1**

|   |             |             |             |
|---|-------------|-------------|-------------|
| U | -0.00233700 | -1.12177700 | 0.23859700  |
| O | 0.16365300  | -1.53542800 | 1.96176400  |
| O | -0.19909800 | -0.83057800 | -1.50703200 |
| O | -0.06945500 | -3.63646700 | -0.18856000 |
| H | -0.04747900 | -4.15884900 | 0.62226800  |
| C | -0.91139200 | -4.30246400 | -1.17658900 |
| C | -2.30662700 | -4.56627700 | -0.64233300 |
| H | -0.40563300 | -5.22273700 | -1.48319100 |
| H | -0.92879400 | -3.61792700 | -2.02395200 |
| H | -2.92099400 | -5.02037800 | -1.42479600 |
| H | -2.28286200 | -5.26086800 | 0.20376200  |
| H | -2.77642900 | -3.63456600 | -0.32123500 |
| O | -2.23621700 | -1.17889500 | 0.44181300  |
| N | -3.13185500 | -0.21483600 | 0.19760900  |
| C | -2.67271400 | 0.98639600  | 0.24411500  |
| N | -1.25357600 | 1.17967000  | 0.53363200  |
| C | -3.56056700 | 2.14062100  | 0.02509300  |
| H | -0.82807700 | 1.80549600  | -0.14708800 |
| H | -1.13406500 | 1.61392500  | 1.44815100  |
| C | -3.09103000 | 3.45709200  | 0.13883200  |
| C | -4.91423100 | 1.94203200  | -0.30513700 |
| C | -3.94237900 | 4.54097900  | -0.06923500 |
| H | -2.05601100 | 3.65159400  | 0.39506500  |
| C | -5.75663400 | 3.02356600  | -0.51155700 |
| H | -5.28224800 | 0.92854900  | -0.39455500 |
| C | -5.27708900 | 4.33077800  | -0.39562700 |
| H | -3.55638900 | 5.54977300  | 0.02475500  |
| H | -6.79613200 | 2.84922600  | -0.76620500 |
| H | -5.93943500 | 5.17298900  | -0.55948100 |

|   |            |             |             |
|---|------------|-------------|-------------|
| N | 3.39963000 | -0.77783400 | -0.59046400 |
| C | 2.96973000 | 0.34711500  | -0.09201100 |
| O | 2.37338200 | -1.79709700 | -0.33157200 |
| N | 1.73318700 | 0.53426400  | 0.42566100  |
| C | 3.96302100 | 1.46229600  | -0.14188700 |
| H | 1.70050300 | 1.36954800  | 0.99830100  |
| C | 5.33494000 | 1.20759200  | -0.02451800 |
| C | 3.53200200 | 2.78336800  | -0.31063000 |
| C | 6.25121800 | 2.25319000  | -0.06933100 |
| H | 5.66551000 | 0.18529900  | 0.10504000  |
| C | 4.45034900 | 3.82877200  | -0.35406600 |
| H | 2.47451300 | 2.98770000  | -0.43315400 |
| C | 5.81295000 | 3.56688100  | -0.23142700 |
| H | 7.31058600 | 2.04337800  | 0.02842600  |
| H | 4.10223100 | 4.84643100  | -0.49214600 |
| H | 6.52886100 | 4.38059500  | -0.26303400 |
| H | 2.60825500 | -2.49843600 | -0.94637000 |

**U-M16-M10-T3**

|   |             |             |             |
|---|-------------|-------------|-------------|
| U | 0.01091800  | -1.00539100 | 0.07749600  |
| O | -0.20130600 | -1.05105700 | 1.84394200  |
| O | 0.24764500  | -1.18510400 | -1.67711900 |
| O | 0.01029000  | -3.56149700 | 0.22931400  |
| H | -0.20391100 | -3.87288500 | 1.11678200  |
| C | -0.50751400 | -4.49452600 | -0.75958800 |
| C | -1.99493300 | -4.73928700 | -0.58116400 |
| H | 0.07194700  | -5.42033000 | -0.68977600 |
| H | -0.29187000 | -4.02204400 | -1.71726300 |
| H | -2.35797400 | -5.40249800 | -1.37147900 |
| H | -2.20410100 | -5.22291500 | 0.37886500  |
| H | -2.54141800 | -3.79554800 | -0.62558100 |
| O | -2.27594300 | -1.34838100 | -0.21101000 |
| N | -3.16874500 | -0.33374500 | -0.04008000 |
| C | -2.69798700 | 0.92223500  | -0.04334200 |
| N | -1.39737900 | 1.08148700  | -0.07078300 |
| C | -3.69759200 | 2.01909000  | 0.00062400  |
| H | -1.11987300 | 2.04796700  | 0.04956900  |
| C | -3.49842700 | 3.17345600  | -0.76754100 |
| C | -4.84081400 | 1.92120400  | 0.80455000  |
| C | -4.42922900 | 4.20631800  | -0.73654300 |
| H | -2.62445800 | 3.24739200  | -1.40460200 |
| C | -5.77003400 | 2.95738300  | 0.83143400  |
| H | -4.98238100 | 1.04646200  | 1.42831300  |

|   |             |             |             |
|---|-------------|-------------|-------------|
| C | -5.56726000 | 4.10083600  | 0.06182800  |
| H | -4.26952600 | 5.09186900  | -1.34088100 |
| H | -6.64643000 | 2.87634000  | 1.46418800  |
| H | -6.29027400 | 4.90803900  | 0.08649400  |
| N | 3.53412600  | -0.79214900 | 0.04850900  |
| C | 3.02716500  | 0.40796500  | 0.11612500  |
| O | 2.43897400  | -1.74265500 | 0.28749300  |
| N | 1.71040800  | 0.67531500  | 0.24693700  |
| C | 4.03396900  | 1.50788400  | 0.02044300  |
| H | 1.54641400  | 1.64028900  | 0.50711300  |
| C | 5.32086000  | 1.35238700  | 0.54942600  |
| C | 3.70043200  | 2.71406700  | -0.60681500 |
| C | 6.24893900  | 2.38469300  | 0.45803400  |
| H | 5.57538300  | 0.41762000  | 1.03183100  |
| C | 4.63068500  | 3.74598800  | -0.69732300 |
| H | 2.71577400  | 2.83144900  | -1.04508100 |
| C | 5.90713700  | 3.58543100  | -0.16288800 |
| H | 7.24061100  | 2.25417700  | 0.87718300  |
| H | 4.36079200  | 4.67242000  | -1.19228000 |
| H | 6.63125600  | 4.38978200  | -0.23063300 |
| H | 2.78826200  | -2.56568300 | -0.06602100 |
| H | -4.10121500 | -0.52346900 | -0.38299400 |

**U-M16-M16-T1**

|   |            |             |             |
|---|------------|-------------|-------------|
| U | 0.04717000 | -1.02806400 | -0.24073200 |
| O | 0.02710200 | -1.47635800 | -1.96461800 |
| O | 0.16446500 | -0.91052100 | 1.52959100  |
| O | 0.28032300 | -3.54356900 | 0.15582300  |
| H | 0.30598800 | -4.11093200 | -0.62311100 |
| C | 0.86586300 | -4.23142200 | 1.29778600  |
| C | 2.32040900 | -4.58874100 | 1.05464000  |
| H | 0.25720500 | -5.11498800 | 1.51220500  |
| H | 0.75962200 | -3.52637000 | 2.12070700  |
| H | 2.73584400 | -5.07491300 | 1.94152100  |
| H | 2.42549600 | -5.28536900 | 0.21635800  |
| H | 2.90306100 | -3.68993300 | 0.84585700  |
| O | 2.54264800 | -1.32953100 | -0.39657100 |
| N | 3.42846000 | -0.16530300 | -0.11625100 |
| C | 2.69850200 | 0.91888200  | -0.21930700 |
| N | 1.38058300 | 0.93834000  | -0.48190400 |
| C | 3.46447100 | 2.18627300  | -0.00426000 |
| H | 1.03475600 | 1.87637700  | -0.64144600 |
| C | 2.85683800 | 3.27618500  | 0.62917800  |

|   |             |             |             |
|---|-------------|-------------|-------------|
| C | 4.79338700  | 2.30009700  | -0.42852100 |
| C | 3.56090600  | 4.46112700  | 0.82570900  |
| H | 1.83918400  | 3.18669000  | 0.99224900  |
| C | 5.49389400  | 3.48595300  | -0.23355600 |
| H | 5.26313300  | 1.45242900  | -0.91013400 |
| C | 4.87998800  | 4.57027500  | 0.39177700  |
| H | 3.08107400  | 5.29567200  | 1.32455900  |
| H | 6.52069900  | 3.56546900  | -0.57279300 |
| H | 5.42770100  | 5.49385100  | 0.54230500  |
| N | -3.40791300 | -0.91710000 | 0.40343100  |
| C | -3.00085100 | 0.25100700  | -0.00679400 |
| O | -2.32143500 | -1.87427300 | 0.14742300  |
| N | -1.74886800 | 0.50384300  | -0.45221900 |
| C | -4.02980000 | 1.33015400  | 0.06441900  |
| H | -1.69234000 | 1.38720000  | -0.94553200 |
| C | -5.38396100 | 1.04738600  | -0.15083300 |
| C | -3.64813900 | 2.64499500  | 0.35603000  |
| C | -6.33316800 | 2.06189300  | -0.08128100 |
| H | -5.67538900 | 0.02954000  | -0.37534200 |
| C | -4.59999300 | 3.65841200  | 0.42538000  |
| H | -2.60534200 | 2.86677600  | 0.55245500  |
| C | -5.94496400 | 3.37012800  | 0.20483700  |
| H | -7.37844800 | 1.83240000  | -0.25609100 |
| H | -4.29169900 | 4.67136300  | 0.65906600  |
| H | -6.68634300 | 4.15967900  | 0.25628300  |
| H | -2.56255800 | -2.61965200 | 0.70501800  |
| H | 2.92773700  | -1.71347200 | -1.19259200 |

**U-H2O-H2O**

|   |             |             |             |
|---|-------------|-------------|-------------|
| U | -0.00000500 | 0.00002200  | 0.04501400  |
| O | -0.00017200 | -0.00018300 | -1.71925900 |
| O | -2.23823400 | -1.07637800 | -0.02103000 |
| O | -0.00057300 | 2.53425400  | 0.02069200  |
| O | -2.23888200 | 1.07642200  | -0.02186700 |
| N | -2.94150600 | -0.00022500 | -0.06516100 |
| O | -4.13594800 | -0.00063100 | -0.13846500 |
| O | 0.00020500  | 0.00013400  | 1.80308100  |
| O | 2.23872800  | 1.07656000  | -0.02179200 |
| O | 0.00023500  | -2.53421300 | 0.02072800  |
| O | 2.23853300  | -1.07626400 | -0.02162600 |
| N | 2.94154400  | 0.00012200  | -0.06528000 |
| O | 4.13601800  | -0.00004100 | -0.13833200 |
| H | 0.78476100  | 2.96968000  | -0.33108100 |

|   |             |             |             |
|---|-------------|-------------|-------------|
| H | 0.78675500  | -2.96845200 | -0.32990500 |
| H | -0.78431300 | -2.96911200 | -0.33347700 |
| H | -0.78627900 | 2.96926300  | -0.33077100 |

**U-H2O-H2O-cis**

|   |             |             |             |
|---|-------------|-------------|-------------|
| U | -0.00012100 | 0.22206500  | -0.00000500 |
| O | -0.00058000 | 0.28366500  | -1.76140800 |
| O | -2.46995000 | 0.06686000  | 0.01200200  |
| O | -1.41272000 | -1.80610500 | 0.01305300  |
| O | -3.59784900 | -1.80661100 | 0.03597100  |
| N | -2.55280400 | -1.22656600 | 0.02182700  |
| O | 0.00127200  | 0.28233000  | 1.76142300  |
| O | 2.46966200  | 0.06652400  | -0.01070900 |
| O | 1.41250400  | -1.80648100 | -0.01421500 |
| O | 3.59759300  | -1.80699300 | -0.03603500 |
| O | -1.36761400 | 2.42513900  | -0.05882400 |
| N | 2.55247300  | -1.22711300 | -0.02188500 |
| H | -1.25582700 | 2.92331400  | -0.87719600 |
| O | 1.36864800  | 2.42515900  | 0.05894100  |
| H | 2.29783500  | 2.15538100  | 0.01615200  |
| H | 1.26186600  | 2.91962900  | 0.88026900  |
| H | -2.29813200 | 2.15955600  | -0.01996500 |

**TS-M8-M9**

|   |             |             |             |
|---|-------------|-------------|-------------|
| U | 0.13018600  | 0.92771200  | -0.14848300 |
| O | -0.60519000 | 0.83117500  | 1.47319200  |
| O | 0.78810100  | 1.14558400  | -1.79428400 |
| O | -0.71801400 | 3.28197500  | -0.29196300 |
| H | -0.74539200 | 3.64115200  | -1.18642800 |
| O | 0.88543600  | -1.48677200 | 0.03340100  |
| C | 0.40573400  | -2.52235000 | 0.92050700  |
| C | 1.15753600  | -3.82436800 | 0.70046300  |
| H | -0.65204700 | -2.63405000 | 0.68206300  |
| H | 0.49191900  | -2.17954200 | 1.95637600  |
| H | 0.75458600  | -4.60470000 | 1.35267000  |
| H | 1.05898000  | -4.15521200 | -0.33596100 |
| H | 2.22170300  | -3.71302400 | 0.92710900  |
| C | -1.76705500 | 3.88696700  | 0.51887100  |
| C | -3.14570200 | 3.63573200  | -0.06176100 |
| H | -1.54306800 | 4.95384200  | 0.61171100  |
| H | -1.65486700 | 3.42088900  | 1.49656900  |
| H | -3.90177200 | 4.09160700  | 0.58458000  |

|   |             |             |             |
|---|-------------|-------------|-------------|
| H | -3.24577100 | 4.08573300  | -1.05530000 |
| H | -3.34401900 | 2.56400400  | -0.13554200 |
| O | -1.75803400 | 0.26301000  | -1.03993200 |
| N | -3.01615100 | 0.09057000  | -0.48693900 |
| C | -3.45710600 | -1.11646300 | -0.63552700 |
| N | -2.69238900 | -2.14002200 | -1.18060200 |
| C | -4.81358300 | -1.44092500 | -0.13935300 |
| H | -1.89156700 | -1.77419000 | -1.68307500 |
| H | -3.21530600 | -2.83046100 | -1.70037000 |
| C | -5.15009100 | -2.75245300 | 0.22249300  |
| C | -5.78806900 | -0.43910200 | -0.02561400 |
| C | -6.42949600 | -3.05476600 | 0.68308400  |
| H | -4.40057400 | -3.53353200 | 0.17118600  |
| C | -7.06178900 | -0.74375000 | 0.43752500  |
| H | -5.52910600 | 0.57202000  | -0.31081700 |
| C | -7.39001900 | -2.05317900 | 0.79135800  |
| H | -6.67153900 | -4.07348700 | 0.96507000  |
| H | -7.80581100 | 0.04125400  | 0.51664900  |
| H | -8.38624400 | -2.28868400 | 1.14854100  |
| N | 2.84917600  | 0.44342300  | 0.38553200  |
| C | 4.12246400  | 0.56959600  | 0.58640100  |
| O | 2.10836000  | 1.54886800  | 0.77429200  |
| N | 4.65154300  | 1.66113800  | 1.23737800  |
| C | 5.02679800  | -0.52598500 | 0.17402500  |
| H | 5.56823800  | 1.95811800  | 0.93939700  |
| H | 3.96964800  | 2.40110000  | 1.35384300  |
| C | 6.19663700  | -0.79567300 | 0.89714200  |
| C | 4.73055800  | -1.30424600 | -0.95436800 |
| C | 7.04652300  | -1.82645900 | 0.50480700  |
| H | 6.42377200  | -0.21085800 | 1.78087900  |
| C | 5.57972200  | -2.33599900 | -1.33880900 |
| H | 3.84312400  | -1.07777500 | -1.53251900 |
| C | 6.74063100  | -2.60065400 | -0.61204500 |
| H | 7.94485300  | -2.02894100 | 1.07722000  |
| H | 5.34249400  | -2.92676500 | -2.21650200 |
| H | 7.40404900  | -3.40177400 | -0.91776800 |
| H | 1.81393600  | -1.23820600 | 0.23041900  |
